# Supplementary material
Source: publisher site journal article supplement (https://www.spandidos-publications.com/2421/downloadSupplementary)
Supplement: Supplementary file 1 [file downloadSupplementary]

## Sheet: 搜库鉴定列表
Table SI. Protein identification list.
Accession_id	Protein FDR Confidence	Description	Coverage	Peptides	PSM	Unique Peptides	AAs	MW[kDa]	calc.pl
Q15149	High	Plectin OS=Homo sapiens OX=9606 GN=PLEC PE=1 SV=3	64	267	761	70	4684	531.5	5.96
H0YDN1	High	Plectin OS=Homo sapiens OX=9606 GN=PLEC PE=1 SV=9	69	197	603	1	3447	387.8	6.05
P21333	High	Filamin-A OS=Homo sapiens OX=9606 GN=FLNA PE=1 SV=4	68	131	523	123	2647	280.6	6.06
Q09666	High	Neuroblast differentiation-associated protein AHNAK OS=Homo sapiens OX=9606 GN=AHNAK PE=1 SV=2	67	203	427	203	5890	628.7	6.15
P35579	High	Myosin-9 OS=Homo sapiens OX=9606 GN=MYH9 PE=1 SV=4	61	124	459	108	1960	226.4	5.6
O75369	High	Filamin-B OS=Homo sapiens OX=9606 GN=FLNB PE=1 SV=2	66	122	309	106	2602	278	5.73
Q13813	High	Spectrin alpha chain, non-erythrocytic 1 OS=Homo sapiens OX=9606 GN=SPTAN1 PE=1 SV=3	67	134	276	2	2472	284.4	5.35
A0A0D9SF54	High	Spectrin alpha chain, non-erythrocytic 1 OS=Homo sapiens OX=9606 GN=SPTAN1 PE=1 SV=1	66	133	272	1	2457	282.7	5.34
Q14204	High	Cytoplasmic dynein 1 heavy chain 1 OS=Homo sapiens OX=9606 GN=DYNC1H1 PE=1 SV=5	47	158	246	158	4646	532.1	6.4
Q01082	High	Spectrin beta chain, non-erythrocytic 1 OS=Homo sapiens OX=9606 GN=SPTBN1 PE=1 SV=2	62	115	232	106	2364	274.4	5.57
P58107	High	Epiplakin OS=Homo sapiens OX=9606 GN=EPPK1 PE=1 SV=3	63	101	231	94	5088	555.3	5.62
P42704	High	Leucine-rich PPR motif-containing protein, mitochondrial OS=Homo sapiens OX=9606 GN=LRPPRC PE=1 SV=3	71	86	264	83	1394	157.8	6.13
P78527	High	DNA-dependent protein kinase catalytic subunit OS=Homo sapiens OX=9606 GN=PRKDC PE=1 SV=3	39	131	227	131	4128	468.8	7.12
A0A087WVQ6	High	Clathrin heavy chain OS=Homo sapiens OX=9606 GN=CLTC PE=1 SV=1	62	83	230	83	1679	191.9	5.69
P31327	High	Carbamoyl-phosphate synthase [ammonia], mitochondrial OS=Homo sapiens OX=9606 GN=CPS1 PE=1 SV=2	69	77	266	74	1500	164.8	6.74
P10809	High	60 kDa heat shock protein, mitochondrial OS=Homo sapiens OX=9606 GN=HSPD1 PE=1 SV=2	81	47	642	47	573	61	5.87
P46940	High	Ras GTPase-activating-like protein IQGAP1 OS=Homo sapiens OX=9606 GN=IQGAP1 PE=1 SV=1	64	81	225	77	1657	189.1	6.48
Q9NZM1	High	Myoferlin OS=Homo sapiens OX=9606 GN=MYOF PE=1 SV=1	57	92	195	92	2061	234.6	6.18
P14618	High	Pyruvate kinase PKM OS=Homo sapiens OX=9606 GN=PKM PE=1 SV=4	81	42	321	18	531	57.9	7.84
A0A2R8Y793	High	Actin, cytoplasmic 1 (Fragment) OS=Homo sapiens OX=9606 GN=ACTB PE=1 SV=1	80	25	631	9	309	34.1	5.17
P35580	High	Myosin-10 OS=Homo sapiens OX=9606 GN=MYH10 PE=1 SV=3	44	74	163	58	1976	228.9	5.54
P06576	High	ATP synthase subunit beta, mitochondrial OS=Homo sapiens OX=9606 GN=ATP5F1B PE=1 SV=3	72	26	232	20	529	56.5	5.4
P13639	High	Elongation factor 2 OS=Homo sapiens OX=9606 GN=EEF2 PE=1 SV=4	72	51	208	50	858	95.3	6.83
P08238	High	Heat shock protein HSP 90-beta OS=Homo sapiens OX=9606 GN=HSP90AB1 PE=1 SV=4	64	47	261	25	724	83.2	5.03
P49327	High	Fatty acid synthase OS=Homo sapiens OX=9606 GN=FASN PE=1 SV=3	46	74	140	74	2511	273.3	6.44
P38646	High	Stress-70 protein, mitochondrial OS=Homo sapiens OX=9606 GN=HSPA9 PE=1 SV=2	62	41	241	40	679	73.6	6.16
P11021	High	Endoplasmic reticulum chaperone BiP OS=Homo sapiens OX=9606 GN=HSPA5 PE=1 SV=2	64	46	308	43	654	72.3	5.16
Q71U36	High	Tubulin alpha-1A chain OS=Homo sapiens OX=9606 GN=TUBA1A PE=1 SV=1	83	29	245	1	451	50.1	5.06
O43707	High	Alpha-actinin-4 OS=Homo sapiens OX=9606 GN=ACTN4 PE=1 SV=2	67	53	168	35	911	104.8	5.44
P05787	High	Keratin, type II cytoskeletal 8 OS=Homo sapiens OX=9606 GN=KRT8 PE=1 SV=7	76	40	256	30	483	53.7	5.59
P07437	High	Tubulin beta chain OS=Homo sapiens OX=9606 GN=TUBB PE=1 SV=2	82	27	326	6	444	49.6	4.89
Q04695	High	Keratin, type I cytoskeletal 17 OS=Homo sapiens OX=9606 GN=KRT17 PE=1 SV=2	87	39	268	26	432	48.1	5.02
Q9Y490	High	Talin-1 OS=Homo sapiens OX=9606 GN=TLN1 PE=1 SV=3	51	78	109	71	2541	269.6	6.07
P07900	High	Heat shock protein HSP 90-alpha OS=Homo sapiens OX=9606 GN=HSP90AA1 PE=1 SV=5	67	47	213	26	732	84.6	5.02
A0A0G2JIW1	High	Heat shock 70 kDa protein 1B OS=Homo sapiens OX=9606 GN=HSPA1B PE=1 SV=1	77	38	186	18	642	70.1	5.66
P08670	High	Vimentin OS=Homo sapiens OX=9606 GN=VIM PE=1 SV=4	79	40	255	34	466	53.6	5.12
F5H5D3	High	Tubulin alpha chain OS=Homo sapiens OX=9606 GN=TUBA1C PE=1 SV=1	72	29	229	3	519	57.7	5.07
Q92616	High	eIF-2-alpha kinase activator GCN1 OS=Homo sapiens OX=9606 GN=GCN1 PE=1 SV=6	42	82	124	82	2671	292.6	7.47
P11142	High	Heat shock cognate 71 kDa protein OS=Homo sapiens OX=9606 GN=HSPA8 PE=1 SV=1	72	38	217	15	646	70.9	5.52
P68371	High	Tubulin beta-4B chain OS=Homo sapiens OX=9606 GN=TUBB4B PE=1 SV=1	82	26	285	4	445	49.8	4.89
P12270	High	Nucleoprotein TPR OS=Homo sapiens OX=9606 GN=TPR PE=1 SV=3	37	76	124	76	2363	267.1	5.02
Q14697	High	Neutral alpha-glucosidase AB OS=Homo sapiens OX=9606 GN=GANAB PE=1 SV=3	60	44	178	9	944	106.8	6.14
O75643	High	U5 small nuclear ribonucleoprotein 200 kDa helicase OS=Homo sapiens OX=9606 GN=SNRNP200 PE=1 SV=2	43	71	124	71	2136	244.4	6.06
P07814	High	Bifunctional glutamate/proline--tRNA ligase OS=Homo sapiens OX=9606 GN=EPRS PE=1 SV=5	56	66	124	65	1512	170.5	7.33
P02545	High	Prelamin-A/C OS=Homo sapiens OX=9606 GN=LMNA PE=1 SV=1	66	46	184	44	664	74.1	7.02
P12814	High	Alpha-actinin-1 OS=Homo sapiens OX=9606 GN=ACTN1 PE=1 SV=2	69	52	145	6	892	103	5.41
P02786	High	Transferrin receptor protein 1 OS=Homo sapiens OX=9606 GN=TFRC PE=1 SV=2	57	40	147	40	760	84.8	6.61
P68366	High	Tubulin alpha-4A chain OS=Homo sapiens OX=9606 GN=TUBA4A PE=1 SV=1	69	26	210	8	448	49.9	5.06
Q08211	High	ATP-dependent RNA helicase A OS=Homo sapiens OX=9606 GN=DHX9 PE=1 SV=4	48	46	134	46	1270	140.9	6.84
P05783	High	Keratin, type I cytoskeletal 18 OS=Homo sapiens OX=9606 GN=KRT18 PE=1 SV=2	75	36	196	35	430	48	5.45
P18206	High	Vinculin OS=Homo sapiens OX=9606 GN=VCL PE=1 SV=4	60	55	141	55	1134	123.7	5.66
P68104	High	Elongation factor 1-alpha 1 OS=Homo sapiens OX=9606 GN=EEF1A1 PE=1 SV=1	76	28	337	16	462	50.1	9.01
P06733	High	Alpha-enolase OS=Homo sapiens OX=9606 GN=ENO1 PE=1 SV=2	76	29	245	23	434	47.1	7.39
Q6P2Q9	High	Pre-mRNA-processing-splicing factor 8 OS=Homo sapiens OX=9606 GN=PRPF8 PE=1 SV=2	40	67	114	67	2335	273.4	8.84
P08195	High	4F2 cell-surface antigen heavy chain OS=Homo sapiens OX=9606 GN=SLC3A2 PE=1 SV=3	58	35	157	34	630	68	5.01
P08729	High	Keratin, type II cytoskeletal 7 OS=Homo sapiens OX=9606 GN=KRT7 PE=1 SV=5	61	36	205	28	469	51.4	5.48
P08133	High	Annexin A6 OS=Homo sapiens OX=9606 GN=ANXA6 PE=1 SV=3	73	46	133	21	673	75.8	5.6
H0YFD6	High	Trifunctional enzyme subunit alpha, mitochondrial OS=Homo sapiens OX=9606 GN=HADHA PE=1 SV=2	60	38	120	38	792	86.3	9.1
E9PKU7	High	Neutral alpha-glucosidase AB OS=Homo sapiens OX=9606 GN=GANAB PE=1 SV=1	58	37	148	2	852	96.5	5.94
P36776	High	Lon protease homolog, mitochondrial OS=Homo sapiens OX=9606 GN=LONP1 PE=1 SV=2	56	40	124	39	959	106.4	6.39
Q92621	High	Nuclear pore complex protein Nup205 OS=Homo sapiens OX=9606 GN=NUP205 PE=1 SV=3	38	52	91	52	2012	227.8	6.19
P49411	High	Elongation factor Tu, mitochondrial OS=Homo sapiens OX=9606 GN=TUFM PE=1 SV=2	73	32	125	32	452	49.5	7.61
P07355	High	Annexin A2 OS=Homo sapiens OX=9606 GN=ANXA2 PE=1 SV=2	78	28	216	19	339	38.6	7.75
P53396	High	ATP-citrate synthase OS=Homo sapiens OX=9606 GN=ACLY PE=1 SV=3	54	48	116	48	1101	120.8	7.33
Q13885	High	Tubulin beta-2A chain OS=Homo sapiens OX=9606 GN=TUBB2A PE=1 SV=1	71	23	262	4	445	49.9	4.89
P55072	High	Transitional endoplasmic reticulum ATPase OS=Homo sapiens OX=9606 GN=VCP PE=1 SV=4	71	43	103	43	806	89.3	5.26
P27708	High	CAD protein OS=Homo sapiens OX=9606 GN=CAD PE=1 SV=3	45	62	102	59	2225	242.8	6.46
P04406	High	Glyceraldehyde-3-phosphate dehydrogenase OS=Homo sapiens OX=9606 GN=GAPDH PE=1 SV=3	87	26	265	26	335	36	8.46
Q14980	High	Nuclear mitotic apparatus protein 1 OS=Homo sapiens OX=9606 GN=NUMA1 PE=1 SV=2	45	68	97	3	2115	238.1	5.78
P25705	High	ATP synthase subunit alpha, mitochondrial OS=Homo sapiens OX=9606 GN=ATP5F1A PE=1 SV=1	68	35	151	35	553	59.7	9.13
A0A494C039	High	Hypoxia up-regulated protein 1 OS=Homo sapiens OX=9606 GN=HYOU1 PE=1 SV=1	56	44	117	44	1000	111.3	5.22
P08758	High	Annexin A5 OS=Homo sapiens OX=9606 GN=ANXA5 PE=1 SV=2	80	29	146	28	320	35.9	5.05
H9KV75	High	Alpha-actinin-1 OS=Homo sapiens OX=9606 GN=ACTN1 PE=1 SV=1	63	42	125	1	822	94.8	5.69
A0A087WY61	High	Nuclear mitotic apparatus protein 1 OS=Homo sapiens OX=9606 GN=NUMA1 PE=1 SV=1	45	66	94	1	2099	236	5.92
P00558	High	Phosphoglycerate kinase 1 OS=Homo sapiens OX=9606 GN=PGK1 PE=1 SV=3	79	31	146	31	417	44.6	8.1
H3BR70	High	Pyruvate kinase OS=Homo sapiens OX=9606 GN=PKM PE=1 SV=1	64	25	206	1	366	40.2	8.03
P13010	High	X-ray repair cross-complementing protein 5 OS=Homo sapiens OX=9606 GN=XRCC5 PE=1 SV=3	72	40	114	40	732	82.7	5.81
P13667	High	Protein disulfide-isomerase A4 OS=Homo sapiens OX=9606 GN=PDIA4 PE=1 SV=2	61	40	132	2	645	72.9	5.07
P14625	High	Endoplasmin OS=Homo sapiens OX=9606 GN=HSP90B1 PE=1 SV=1	58	44	129	42	803	92.4	4.84
P78371	High	T-complex protein 1 subunit beta OS=Homo sapiens OX=9606 GN=CCT2 PE=1 SV=4	73	29	102	29	535	57.5	6.46
P12956	High	X-ray repair cross-complementing protein 6 OS=Homo sapiens OX=9606 GN=XRCC6 PE=1 SV=2	58	31	119	31	609	69.8	6.64
P16615	High	Sarcoplasmic/endoplasmic reticulum calcium ATPase 2 OS=Homo sapiens OX=9606 GN=ATP2A2 PE=1 SV=1	48	43	101	43	1042	114.7	5.34
P49792	High	E3 SUMO-protein ligase RanBP2 OS=Homo sapiens OX=9606 GN=RANBP2 PE=1 SV=2	33	67	100	44	3224	358	6.2
P30101	High	Protein disulfide-isomerase A3 OS=Homo sapiens OX=9606 GN=PDIA3 PE=1 SV=4	63	31	135	25	505	56.7	6.35
P22314	High	Ubiquitin-like modifier-activating enzyme 1 OS=Homo sapiens OX=9606 GN=UBA1 PE=1 SV=3	52	38	97	38	1058	117.8	5.76
P27797	High	Calreticulin OS=Homo sapiens OX=9606 GN=CALR PE=1 SV=1	77	26	179	26	417	48.1	4.44
Q00839	High	Heterogeneous nuclear ribonucleoprotein U OS=Homo sapiens OX=9606 GN=HNRNPU PE=1 SV=6	47	34	121	34	825	90.5	6
P07237	High	Protein disulfide-isomerase OS=Homo sapiens OX=9606 GN=P4HB PE=1 SV=3	65	32	135	32	508	57.1	4.87
P04264	High	Keratin, type II cytoskeletal 1 OS=Homo sapiens OX=9606 GN=KRT1 PE=1 SV=6	59	40	130	32	644	66	8.12
A0A499FI48	High	Protein disulfide-isomerase OS=Homo sapiens OX=9606 GN=PDIA4 PE=1 SV=1	61	39	122	1	646	73	5.07
P50454	High	Serpin H1 OS=Homo sapiens OX=9606 GN=SERPINH1 PE=1 SV=2	68	24	113	24	418	46.4	8.69
P26038	High	Moesin OS=Homo sapiens OX=9606 GN=MSN PE=1 SV=3	66	40	107	28	577	67.8	6.4
Q6PEY2	High	Tubulin alpha-3E chain OS=Homo sapiens OX=9606 GN=TUBA3E PE=1 SV=2	55	17	163	1	450	49.8	5.14
Q12931	High	Heat shock protein 75 kDa, mitochondrial OS=Homo sapiens OX=9606 GN=TRAP1 PE=1 SV=3	57	33	118	32	704	80.1	8.21
P26639	High	Threonine--tRNA ligase 1, cytoplasmic OS=Homo sapiens OX=9606 GN=TARS1 PE=1 SV=3	62	38	113	38	723	83.4	6.67
P20700	High	Lamin-B1 OS=Homo sapiens OX=9606 GN=LMNB1 PE=1 SV=2	64	37	117	33	586	66.4	5.16
P49748	High	Very long-chain specific acyl-CoA dehydrogenase, mitochondrial OS=Homo sapiens OX=9606 GN=ACADVL PE=1 SV=1	70	36	110	36	655	70.3	8.75
P13645	High	Keratin, type I cytoskeletal 10 OS=Homo sapiens OX=9606 GN=KRT10 PE=1 SV=6	57	30	107	24	584	58.8	5.21
Q8TEM1	High	Nuclear pore membrane glycoprotein 210 OS=Homo sapiens OX=9606 GN=NUP210 PE=1 SV=3	31	42	98	42	1887	205	6.81
Q13423	High	NAD(P) transhydrogenase, mitochondrial OS=Homo sapiens OX=9606 GN=NNT PE=1 SV=3	43	36	101	36	1086	113.8	8.09
Q14974	High	Importin subunit beta-1 OS=Homo sapiens OX=9606 GN=KPNB1 PE=1 SV=2	50	30	85	30	876	97.1	4.78
P04844	High	Dolichyl-diphosphooligosaccharide--protein glycosyltransferase subunit 2 OS=Homo sapiens OX=9606 GN=RPN2 PE=1 SV=3	61	26	84	26	631	69.2	5.69
P11498	High	Pyruvate carboxylase, mitochondrial OS=Homo sapiens OX=9606 GN=PC PE=1 SV=2	44	37	84	37	1178	129.6	6.84
Q02218	High	2-oxoglutarate dehydrogenase, mitochondrial OS=Homo sapiens OX=9606 GN=OGDH PE=1 SV=3	52	44	83	44	1023	115.9	6.86
O95573	High	Long-chain-fatty-acid--CoA ligase 3 OS=Homo sapiens OX=9606 GN=ACSL3 PE=1 SV=3	65	33	98	30	720	80.4	8.38
P60842	High	Eukaryotic initiation factor 4A-I OS=Homo sapiens OX=9606 GN=EIF4A1 PE=1 SV=1	68	26	107	14	406	46.1	5.48
O75533	High	Splicing factor 3B subunit 1 OS=Homo sapiens OX=9606 GN=SF3B1 PE=1 SV=3	46	42	71	42	1304	145.7	7.09
P55809	High	Succinyl-CoA:3-ketoacid coenzyme A transferase 1, mitochondrial OS=Homo sapiens OX=9606 GN=OXCT1 PE=1 SV=1	61	23	84	23	520	56.1	7.46
P05023	High	Sodium/potassium-transporting ATPase subunit alpha-1 OS=Homo sapiens OX=9606 GN=ATP1A1 PE=1 SV=1	43	38	90	38	1023	112.8	5.49
P26640	High	Valine--tRNA ligase OS=Homo sapiens OX=9606 GN=VARS PE=1 SV=4	46	42	89	42	1264	140.4	7.59
P68032	High	Actin, alpha cardiac muscle 1 OS=Homo sapiens OX=9606 GN=ACTC1 PE=1 SV=1	49	21	291	2	377	42	5.39
P52272	High	Heterogeneous nuclear ribonucleoprotein M OS=Homo sapiens OX=9606 GN=HNRNPM PE=1 SV=3	70	42	105	42	730	77.5	8.7
P68133	High	Actin, alpha skeletal muscle OS=Homo sapiens OX=9606 GN=ACTA1 PE=1 SV=1	49	20	291	1	377	42	5.39
P29401	High	Transketolase OS=Homo sapiens OX=9606 GN=TKT PE=1 SV=3	70	31	100	31	623	67.8	7.66
P11717	High	Cation-independent mannose-6-phosphate receptor OS=Homo sapiens OX=9606 GN=IGF2R PE=1 SV=3	31	51	74	51	2491	274.2	5.94
P34897	High	Serine hydroxymethyltransferase, mitochondrial OS=Homo sapiens OX=9606 GN=SHMT2 PE=1 SV=3	70	26	104	13	504	56	8.53
P17987	High	T-complex protein 1 subunit alpha OS=Homo sapiens OX=9606 GN=TCP1 PE=1 SV=1	70	29	85	29	556	60.3	6.11
Q9BSJ8	High	Extended synaptotagmin-1 OS=Homo sapiens OX=9606 GN=ESYT1 PE=1 SV=1	47	34	71	34	1104	122.8	5.83
C9J406	High	MICOS complex subunit MIC60 OS=Homo sapiens OX=9606 GN=IMMT PE=1 SV=1	65	36	86	3	659	73.2	6.07
Q16891	High	MICOS complex subunit MIC60 OS=Homo sapiens OX=9606 GN=IMMT PE=1 SV=1	62	37	85	4	758	83.6	6.48
P05141	High	ADP/ATP translocase 2 OS=Homo sapiens OX=9606 GN=SLC25A5 PE=1 SV=7	51	21	145	7	298	32.8	9.69
P50991	High	T-complex protein 1 subunit delta OS=Homo sapiens OX=9606 GN=CCT4 PE=1 SV=4	64	30	99	29	539	57.9	7.83
Q9BQG0	High	Myb-binding protein 1A OS=Homo sapiens OX=9606 GN=MYBBP1A PE=1 SV=2	38	41	85	41	1328	148.8	9.28
P34932	High	Heat shock 70 kDa protein 4 OS=Homo sapiens OX=9606 GN=HSPA4 PE=1 SV=4	59	38	78	36	840	94.3	5.19
O43175	High	D-3-phosphoglycerate dehydrogenase OS=Homo sapiens OX=9606 GN=PHGDH PE=1 SV=4	60	25	98	25	533	56.6	6.71
P53621	High	Coatomer subunit alpha OS=Homo sapiens OX=9606 GN=COPA PE=1 SV=2	52	45	74	45	1224	138.3	7.66
P40926	High	Malate dehydrogenase, mitochondrial OS=Homo sapiens OX=9606 GN=MDH2 PE=1 SV=3	64	20	106	20	338	35.5	8.68
P19338	High	Nucleolin OS=Homo sapiens OX=9606 GN=NCL PE=1 SV=3	41	34	109	34	710	76.6	4.7
P04075	High	Fructose-bisphosphate aldolase A OS=Homo sapiens OX=9606 GN=ALDOA PE=1 SV=2	76	24	120	19	364	39.4	8.09
Q7Z6Z7	High	E3 ubiquitin-protein ligase HUWE1 OS=Homo sapiens OX=9606 GN=HUWE1 PE=1 SV=3	22	51	64	51	4374	481.6	5.22
Q07065	High	Cytoskeleton-associated protein 4 OS=Homo sapiens OX=9606 GN=CKAP4 PE=1 SV=2	54	29	82	29	602	66	5.92
P48643	High	T-complex protein 1 subunit epsilon OS=Homo sapiens OX=9606 GN=CCT5 PE=1 SV=1	65	34	98	33	541	59.6	5.66
P35908	High	Keratin, type II cytoskeletal 2 epidermal OS=Homo sapiens OX=9606 GN=KRT2 PE=1 SV=2	71	35	81	25	639	65.4	8
P22102	High	Trifunctional purine biosynthetic protein adenosine-3 OS=Homo sapiens OX=9606 GN=GART PE=1 SV=1	53	36	66	36	1010	107.7	6.7
P11586	High	C-1-tetrahydrofolate synthase, cytoplasmic OS=Homo sapiens OX=9606 GN=MTHFD1 PE=1 SV=3	57	41	73	41	935	101.5	7.3
Q99832	High	T-complex protein 1 subunit eta OS=Homo sapiens OX=9606 GN=CCT7 PE=1 SV=2	66	28	92	28	543	59.3	7.65
P35527	High	Keratin, type I cytoskeletal 9 OS=Homo sapiens OX=9606 GN=KRT9 PE=1 SV=3	58	24	84	23	623	62	5.24
O00159	High	Unconventional myosin-Ic OS=Homo sapiens OX=9606 GN=MYO1C PE=1 SV=4	48	38	71	37	1063	121.6	9.41
P16435	High	NADPH--cytochrome P450 reductase OS=Homo sapiens OX=9606 GN=POR PE=1 SV=2	60	31	78	31	677	76.6	5.58
P54886	High	Delta-1-pyrroline-5-carboxylate synthase OS=Homo sapiens OX=9606 GN=ALDH18A1 PE=1 SV=2	54	32	67	32	795	87.2	7.12
P21796	High	Voltage-dependent anion-selective channel protein 1 OS=Homo sapiens OX=9606 GN=VDAC1 PE=1 SV=2	75	15	123	14	283	30.8	8.54
Q9NR30	High	Nucleolar RNA helicase 2 OS=Homo sapiens OX=9606 GN=DDX21 PE=1 SV=5	51	35	90	32	783	87.3	9.28
Q15029	High	116 kDa U5 small nuclear ribonucleoprotein component OS=Homo sapiens OX=9606 GN=EFTUD2 PE=1 SV=1	50	32	69	31	972	109.4	5
P26641	High	Elongation factor 1-gamma OS=Homo sapiens OX=9606 GN=EEF1G PE=1 SV=3	71	25	90	25	437	50.1	6.67
O43852	High	Calumenin OS=Homo sapiens OX=9606 GN=CALU PE=1 SV=2	72	20	85	20	315	37.1	4.64
O60506	High	Heterogeneous nuclear ribonucleoprotein Q OS=Homo sapiens OX=9606 GN=SYNCRIP PE=1 SV=2	55	29	85	6	623	69.6	8.59
P00338	High	L-lactate dehydrogenase A chain OS=Homo sapiens OX=9606 GN=LDHA PE=1 SV=2	70	24	112	23	332	36.7	8.27
P15144	High	Aminopeptidase N OS=Homo sapiens OX=9606 GN=ANPEP PE=1 SV=4	46	35	72	35	967	109.5	5.48
A0A2R8YEA7	High	Actin, cytoplasmic 1 (Fragment) OS=Homo sapiens OX=9606 GN=ACTB PE=1 SV=1	76	10	319	1	157	17.5	4.73
P51659	High	Peroxisomal multifunctional enzyme type 2 OS=Homo sapiens OX=9606 GN=HSD17B4 PE=1 SV=3	62	36	73	36	736	79.6	8.84
A0A2U3TZH3	High	Elongation factor 1-alpha OS=Homo sapiens OX=9606 GN=EEF1A2 PE=1 SV=1	57	20	154	8	496	54.3	9.04
Q92598	High	Heat shock protein 105 kDa OS=Homo sapiens OX=9606 GN=HSPH1 PE=1 SV=1	47	30	66	27	858	96.8	5.39
P61978	High	Heterogeneous nuclear ribonucleoprotein K OS=Homo sapiens OX=9606 GN=HNRNPK PE=1 SV=1	60	23	98	23	463	50.9	5.54
P43304	High	Glycerol-3-phosphate dehydrogenase, mitochondrial OS=Homo sapiens OX=9606 GN=GPD2 PE=1 SV=3	64	32	73	32	727	80.8	7.69
P04843	High	Dolichyl-diphosphooligosaccharide--protein glycosyltransferase subunit 1 OS=Homo sapiens OX=9606 GN=RPN1 PE=1 SV=1	59	26	80	26	607	68.5	6.38
P50990	High	T-complex protein 1 subunit theta OS=Homo sapiens OX=9606 GN=CCT8 PE=1 SV=4	67	32	76	32	548	59.6	5.6
Q99715	High	Collagen alpha-1(XII) chain OS=Homo sapiens OX=9606 GN=COL12A1 PE=1 SV=2	28	55	64	55	3063	332.9	5.53
P50395	High	Rab GDP dissociation inhibitor beta OS=Homo sapiens OX=9606 GN=GDI2 PE=1 SV=2	65	29	72	21	445	50.6	6.47
P42765	High	3-ketoacyl-CoA thiolase, mitochondrial OS=Homo sapiens OX=9606 GN=ACAA2 PE=1 SV=2	69	20	75	19	397	41.9	8.09
P12236	High	ADP/ATP translocase 3 OS=Homo sapiens OX=9606 GN=SLC25A6 PE=1 SV=4	61	21	119	3	298	32.8	9.74
O75694	High	Nuclear pore complex protein Nup155 OS=Homo sapiens OX=9606 GN=NUP155 PE=1 SV=1	33	33	62	33	1391	155.1	6.16
O43390	High	Heterogeneous nuclear ribonucleoprotein R OS=Homo sapiens OX=9606 GN=HNRNPR PE=1 SV=1	52	31	84	22	633	70.9	8.13
P04083	High	Annexin A1 OS=Homo sapiens OX=9606 GN=ANXA1 PE=1 SV=2	66	22	79	22	346	38.7	7.02
E5RK69	High	Annexin OS=Homo sapiens OX=9606 GN=ANXA6 PE=1 SV=1	63	26	78	1	460	51.7	6.05
O00116	High	Alkyldihydroxyacetonephosphate synthase, peroxisomal OS=Homo sapiens OX=9606 GN=AGPS PE=1 SV=1	57	25	66	25	658	72.9	7.34
Q8IVF2	High	Protein AHNAK2 OS=Homo sapiens OX=9606 GN=AHNAK2 PE=1 SV=2	30	54	68	54	5795	616.2	5.36
E7EQR4	High	Ezrin OS=Homo sapiens OX=9606 GN=EZR PE=1 SV=3	51	31	75	20	586	69.3	6.16
Q12906	High	Interleukin enhancer-binding factor 3 OS=Homo sapiens OX=9606 GN=ILF3 PE=1 SV=3	49	31	87	26	894	95.3	8.76
Q03252	High	Lamin-B2 OS=Homo sapiens OX=9606 GN=LMNB2 PE=1 SV=4	51	33	86	29	620	69.9	5.59
Q7KZF4	High	Staphylococcal nuclease domain-containing protein 1 OS=Homo sapiens OX=9606 GN=SND1 PE=1 SV=1	45	31	65	31	910	101.9	7.17
Q8WUM0	High	Nuclear pore complex protein Nup133 OS=Homo sapiens OX=9606 GN=NUP133 PE=1 SV=2	47	34	48	34	1156	128.9	5.1
P56192	High	Methionine--tRNA ligase, cytoplasmic OS=Homo sapiens OX=9606 GN=MARS PE=1 SV=2	47	28	65	28	900	101.1	6.16
Q16881	High	Thioredoxin reductase 1, cytoplasmic OS=Homo sapiens OX=9606 GN=TXNRD1 PE=1 SV=3	53	28	55	27	649	70.9	7.39
P49368	High	T-complex protein 1 subunit gamma OS=Homo sapiens OX=9606 GN=CCT3 PE=1 SV=4	54	28	76	28	545	60.5	6.49
Q14152	High	Eukaryotic translation initiation factor 3 subunit A OS=Homo sapiens OX=9606 GN=EIF3A PE=1 SV=1	34	42	71	42	1382	166.5	6.79
Q99714	High	3-hydroxyacyl-CoA dehydrogenase type-2 OS=Homo sapiens OX=9606 GN=HSD17B10 PE=1 SV=3	89	17	67	17	261	26.9	7.78
K7ELL7	High	Glucosidase 2 subunit beta OS=Homo sapiens OX=9606 GN=PRKCSH PE=1 SV=1	47	20	92	20	535	60.2	4.41
P19367	High	Hexokinase-1 OS=Homo sapiens OX=9606 GN=HK1 PE=1 SV=3	42	34	71	31	917	102.4	6.8
P39023	High	60S ribosomal protein L3 OS=Homo sapiens OX=9606 GN=RPL3 PE=1 SV=2	54	23	90	23	403	46.1	10.18
P41252	High	Isoleucine--tRNA ligase, cytoplasmic OS=Homo sapiens OX=9606 GN=IARS PE=1 SV=2	40	41	62	41	1262	144.4	6.15
E9PK54	High	Heat shock cognate 71 kDa protein (Fragment) OS=Homo sapiens OX=9606 GN=HSPA8 PE=1 SV=8	91	15	108	1	183	19.9	7.33
P55060	High	Exportin-2 OS=Homo sapiens OX=9606 GN=CSE1L PE=1 SV=3	46	36	61	36	971	110.3	5.77
O00410	High	Importin-5 OS=Homo sapiens OX=9606 GN=IPO5 PE=1 SV=4	47	33	54	31	1097	123.6	4.94
Q9BUF5	High	Tubulin beta-6 chain OS=Homo sapiens OX=9606 GN=TUBB6 PE=1 SV=1	77	21	82	13	446	49.8	4.88
P24752	High	Acetyl-CoA acetyltransferase, mitochondrial OS=Homo sapiens OX=9606 GN=ACAT1 PE=1 SV=1	65	21	64	21	427	45.2	8.85
Q86VP6	High	Cullin-associated NEDD8-dissociated protein 1 OS=Homo sapiens OX=9606 GN=CAND1 PE=1 SV=2	40	36	67	36	1230	136.3	5.78
O94826	High	Mitochondrial import receptor subunit TOM70 OS=Homo sapiens OX=9606 GN=TOMM70 PE=1 SV=1	57	28	55	28	608	67.4	7.12
A8MXP9	High	Matrin-3 OS=Homo sapiens OX=9606 GN=MATR3 PE=1 SV=1	40	26	63	26	895	99.9	6.04
H0Y2W2	High	ATPase family AAA domain-containing protein 3A (Fragment) OS=Homo sapiens OX=9606 GN=ATAD3A PE=1 SV=1	56	27	70	11	572	64.3	9.44
P50416	High	Carnitine O-palmitoyltransferase 1, liver isoform OS=Homo sapiens OX=9606 GN=CPT1A PE=1 SV=2	42	28	65	28	773	88.3	8.65
P06748	High	Nucleophosmin OS=Homo sapiens OX=9606 GN=NPM1 PE=1 SV=2	57	16	136	16	294	32.6	4.78
A0A3B3IT92	High	DNA helicase OS=Homo sapiens OX=9606 GN=MCM4 PE=1 SV=1	46	32	56	32	904	100.7	6.95
P00505	High	Aspartate aminotransferase, mitochondrial OS=Homo sapiens OX=9606 GN=GOT2 PE=1 SV=3	65	24	74	24	430	47.5	9.01
Q9P2J5	High	Leucine--tRNA ligase, cytoplasmic OS=Homo sapiens OX=9606 GN=LARS PE=1 SV=2	41	34	57	34	1176	134.4	7.3
P31939	High	Bifunctional purine biosynthesis protein PURH OS=Homo sapiens OX=9606 GN=ATIC PE=1 SV=3	67	29	61	29	592	64.6	6.71
P62805	High	Histone H4 OS=Homo sapiens OX=9606 GN=H4C1 PE=1 SV=2	66	13	198	13	103	11.4	11.36
P63244	High	Receptor of activated protein C kinase 1 OS=Homo sapiens OX=9606 GN=RACK1 PE=1 SV=3	79	20	75	20	317	35.1	7.69
Q04637	High	Eukaryotic translation initiation factor 4 gamma 1 OS=Homo sapiens OX=9606 GN=EIF4G1 PE=1 SV=4	32	40	70	37	1599	175.4	5.33
P13797	High	Plastin-3 OS=Homo sapiens OX=9606 GN=PLS3 PE=1 SV=4	56	28	61	24	630	70.8	5.6
P60174	High	Triosephosphate isomerase OS=Homo sapiens OX=9606 GN=TPI1 PE=1 SV=3	75	17	75	17	286	30.8	5.92
Q01813	High	ATP-dependent 6-phosphofructokinase, platelet type OS=Homo sapiens OX=9606 GN=PFKP PE=1 SV=2	48	29	66	24	784	85.5	7.55
Q5T9A4	High	ATPase family AAA domain-containing protein 3B OS=Homo sapiens OX=9606 GN=ATAD3B PE=1 SV=1	53	28	81	12	648	72.5	9.2
Q14643	High	Inositol 1,4,5-trisphosphate receptor type 1 OS=Homo sapiens OX=9606 GN=ITPR1 PE=1 SV=3	23	47	58	39	2758	313.7	6.04
Q9NYU2	High	UDP-glucose:glycoprotein glucosyltransferase 1 OS=Homo sapiens OX=9606 GN=UGGT1 PE=1 SV=3	34	36	54	36	1555	177.1	5.63
Q12769	High	Nuclear pore complex protein Nup160 OS=Homo sapiens OX=9606 GN=NUP160 PE=1 SV=3	35	32	50	32	1436	162	5.5
P41250	High	Glycine--tRNA ligase OS=Homo sapiens OX=9606 GN=GARS1 PE=1 SV=3	51	26	56	26	739	83.1	7.03
P27824	High	Calnexin OS=Homo sapiens OX=9606 GN=CANX PE=1 SV=2	50	25	92	17	592	67.5	4.6
O43143	High	Pre-mRNA-splicing factor ATP-dependent RNA helicase DHX15 OS=Homo sapiens OX=9606 GN=DHX15 PE=1 SV=2	46	30	68	29	795	90.9	7.46
P31948	High	Stress-induced-phosphoprotein 1 OS=Homo sapiens OX=9606 GN=STIP1 PE=1 SV=1	56	31	64	31	543	62.6	6.8
O00567	High	Nucleolar protein 56 OS=Homo sapiens OX=9606 GN=NOP56 PE=1 SV=4	66	27	62	27	594	66	9.19
P35232	High	Prohibitin OS=Homo sapiens OX=9606 GN=PHB PE=1 SV=1	76	18	64	18	272	29.8	5.76
P36578	High	60S ribosomal protein L4 OS=Homo sapiens OX=9606 GN=RPL4 PE=1 SV=5	50	22	82	22	427	47.7	11.06
B2R5W2	High	Heterogeneous nuclear ribonucleoproteins C1/C2 OS=Homo sapiens OX=9606 GN=HNRNPC PE=1 SV=1	50	18	83	1	290	31.9	5.24
Q16531	High	DNA damage-binding protein 1 OS=Homo sapiens OX=9606 GN=DDB1 PE=1 SV=1	40	37	58	37	1140	126.9	5.26
Q15393	High	Splicing factor 3B subunit 3 OS=Homo sapiens OX=9606 GN=SF3B3 PE=1 SV=4	44	35	55	35	1217	135.5	5.26
Q9UQ35	High	Serine/arginine repetitive matrix protein 2 OS=Homo sapiens OX=9606 GN=SRRM2 PE=1 SV=2	19	34	56	34	2752	299.4	12.06
Q14573	High	Inositol 1,4,5-trisphosphate receptor type 3 OS=Homo sapiens OX=9606 GN=ITPR3 PE=1 SV=2	25	44	53	39	2671	303.9	6.48
P62258	High	14-3-3 protein epsilon OS=Homo sapiens OX=9606 GN=YWHAE PE=1 SV=1	73	19	133	16	255	29.2	4.74
P11940	High	Polyadenylate-binding protein 1 OS=Homo sapiens OX=9606 GN=PABPC1 PE=1 SV=2	38	23	62	7	636	70.6	9.5
A0A1C7CYX9	High	Dihydropyrimidinase-related protein 2 OS=Homo sapiens OX=9606 GN=DPYSL2 PE=1 SV=1	52	22	52	19	677	73.5	6.35
Q8IY81	High	pre-rRNA 2'-O-ribose RNA methyltransferase FTSJ3 OS=Homo sapiens OX=9606 GN=FTSJ3 PE=1 SV=2	46	27	50	27	847	96.5	8.4
P12235	High	ADP/ATP translocase 1 OS=Homo sapiens OX=9606 GN=SLC25A4 PE=1 SV=4	59	18	100	4	298	33	9.76
P34931	High	Heat shock 70 kDa protein 1-like OS=Homo sapiens OX=9606 GN=HSPA1L PE=1 SV=2	36	18	106	1	641	70.3	6.02
P07910	High	Heterogeneous nuclear ribonucleoproteins C1/C2 OS=Homo sapiens OX=9606 GN=HNRNPC PE=1 SV=4	52	18	78	1	306	33.7	5.08
P07195	High	L-lactate dehydrogenase B chain OS=Homo sapiens OX=9606 GN=LDHB PE=1 SV=2	63	21	73	20	334	36.6	6.05
P00367	High	Glutamate dehydrogenase 1, mitochondrial OS=Homo sapiens OX=9606 GN=GLUD1 PE=1 SV=2	52	24	62	24	558	61.4	7.8
P00966	High	Argininosuccinate synthase OS=Homo sapiens OX=9606 GN=ASS1 PE=1 SV=2	67	22	72	22	412	46.5	8.02
O94925	High	Glutaminase kidney isoform, mitochondrial OS=Homo sapiens OX=9606 GN=GLS PE=1 SV=1	42	21	61	20	669	73.4	7.77
A0A0D9SF53	High	ATP-dependent RNA helicase DDX3X OS=Homo sapiens OX=9606 GN=DDX3X PE=1 SV=1	46	31	62	30	733	81.4	8.07
P40227	High	T-complex protein 1 subunit zeta OS=Homo sapiens OX=9606 GN=CCT6A PE=1 SV=3	63	27	65	22	531	58	6.68
Q06210	High	Glutamine--fructose-6-phosphate aminotransferase [isomerizing] 1 OS=Homo sapiens OX=9606 GN=GFPT1 PE=1 SV=3	50	25	52	19	699	78.8	7.11
P49588	High	Alanine--tRNA ligase, cytoplasmic OS=Homo sapiens OX=9606 GN=AARS PE=1 SV=2	46	29	46	29	968	106.7	5.53
Q5T4S7	High	E3 ubiquitin-protein ligase UBR4 OS=Homo sapiens OX=9606 GN=UBR4 PE=1 SV=1	14	43	49	43	5183	573.5	6.04
P11388	High	DNA topoisomerase 2-alpha OS=Homo sapiens OX=9606 GN=TOP2A PE=1 SV=3	32	35	54	28	1531	174.3	8.72
P25205	High	DNA replication licensing factor MCM3 OS=Homo sapiens OX=9606 GN=MCM3 PE=1 SV=3	54	33	57	33	808	90.9	5.77
Q9UJS0	High	Calcium-binding mitochondrial carrier protein Aralar2 OS=Homo sapiens OX=9606 GN=SLC25A13 PE=1 SV=2	61	30	60	23	675	74.1	8.62
P31930	High	Cytochrome b-c1 complex subunit 1, mitochondrial OS=Homo sapiens OX=9606 GN=UQCRC1 PE=1 SV=3	56	19	63	18	480	52.6	6.37
P38919	High	Eukaryotic initiation factor 4A-III OS=Homo sapiens OX=9606 GN=EIF4A3 PE=1 SV=4	71	24	62	21	411	46.8	6.73
P09622	High	Dihydrolipoyl dehydrogenase, mitochondrial OS=Homo sapiens OX=9606 GN=DLD PE=1 SV=2	51	17	54	17	509	54.1	7.85
P09651	High	Heterogeneous nuclear ribonucleoprotein A1 OS=Homo sapiens OX=9606 GN=HNRNPA1 PE=1 SV=5	47	16	86	13	372	38.7	9.13
P55786	High	Puromycin-sensitive aminopeptidase OS=Homo sapiens OX=9606 GN=NPEPPS PE=1 SV=2	56	38	55	38	919	103.2	5.72
Q08J23	High	RNA cytosine C(5)-methyltransferase NSUN2 OS=Homo sapiens OX=9606 GN=NSUN2 PE=1 SV=2	65	34	52	34	767	86.4	6.77
Q16822	High	Phosphoenolpyruvate carboxykinase [GTP], mitochondrial OS=Homo sapiens OX=9606 GN=PCK2 PE=1 SV=4	52	24	60	24	640	70.7	7.62
A0A1W2PQ51	High	Probable ATP-dependent RNA helicase DDX17 OS=Homo sapiens OX=9606 GN=DDX17 PE=1 SV=1	46	27	69	19	731	80.4	8.37
Q6DD88	High	Atlastin-3 OS=Homo sapiens OX=9606 GN=ATL3 PE=1 SV=1	60	23	55	23	541	60.5	5.66
P18669	High	Phosphoglycerate mutase 1 OS=Homo sapiens OX=9606 GN=PGAM1 PE=1 SV=2	68	12	59	12	254	28.8	7.18
Q99623	High	Prohibitin-2 OS=Homo sapiens OX=9606 GN=PHB2 PE=1 SV=2	74	22	65	22	299	33.3	9.83
Q99460	High	26S proteasome non-ATPase regulatory subunit 1 OS=Homo sapiens OX=9606 GN=PSMD1 PE=1 SV=2	41	27	46	27	953	105.8	5.39
Q15365	High	Poly(rC)-binding protein 1 OS=Homo sapiens OX=9606 GN=PCBP1 PE=1 SV=2	72	17	59	12	356	37.5	7.09
P31040	High	Succinate dehydrogenase [ubiquinone] flavoprotein subunit, mitochondrial OS=Homo sapiens OX=9606 GN=SDHA PE=1 SV=2	61	26	54	26	664	72.6	7.39
P57740	High	Nuclear pore complex protein Nup107 OS=Homo sapiens OX=9606 GN=NUP107 PE=1 SV=1	51	29	46	29	925	106.3	5.43
Q14566	High	DNA replication licensing factor MCM6 OS=Homo sapiens OX=9606 GN=MCM6 PE=1 SV=1	43	27	50	27	821	92.8	5.41
A0A087WUT6	High	Eukaryotic translation initiation factor 5B OS=Homo sapiens OX=9606 GN=EIF5B PE=1 SV=1	30	29	45	29	1220	138.6	5.58
B7Z645	High	Heterogeneous nuclear ribonucleoprotein Q OS=Homo sapiens OX=9606 GN=SYNCRIP PE=1 SV=1	51	21	69	1	464	52	9.16
E9PK25	High	Cofilin-1 OS=Homo sapiens OX=9606 GN=CFL1 PE=1 SV=1	63	20	72	14	204	22.7	8.34
O76021	High	Ribosomal L1 domain-containing protein 1 OS=Homo sapiens OX=9606 GN=RSL1D1 PE=1 SV=3	49	24	63	24	490	54.9	10.13
Q9Y265	High	RuvB-like 1 OS=Homo sapiens OX=9606 GN=RUVBL1 PE=1 SV=1	57	19	55	19	456	50.2	6.42
P37802	High	Transgelin-2 OS=Homo sapiens OX=9606 GN=TAGLN2 PE=1 SV=3	82	15	55	15	199	22.4	8.25
Q15084	High	Protein disulfide-isomerase A6 OS=Homo sapiens OX=9606 GN=PDIA6 PE=1 SV=1	51	16	59	16	440	48.1	5.08
P23246	High	Splicing factor, proline- and glutamine-rich OS=Homo sapiens OX=9606 GN=SFPQ PE=1 SV=2	35	23	52	22	707	76.1	9.44
P08240	High	Signal recognition particle receptor subunit alpha OS=Homo sapiens OX=9606 GN=SRPRA PE=1 SV=2	51	26	53	26	638	69.8	8.95
P13804	High	Electron transfer flavoprotein subunit alpha, mitochondrial OS=Homo sapiens OX=9606 GN=ETFA PE=1 SV=1	68	17	58	17	333	35.1	8.38
P11413	High	Glucose-6-phosphate 1-dehydrogenase OS=Homo sapiens OX=9606 GN=G6PD PE=1 SV=4	65	25	60	25	515	59.2	6.84
Q12905	High	Interleukin enhancer-binding factor 2 OS=Homo sapiens OX=9606 GN=ILF2 PE=1 SV=2	61	19	58	19	390	43	5.26
P63010	High	AP-2 complex subunit beta OS=Homo sapiens OX=9606 GN=AP2B1 PE=1 SV=1	47	31	46	20	937	104.5	5.38
O43615	High	Mitochondrial import inner membrane translocase subunit TIM44 OS=Homo sapiens OX=9606 GN=TIMM44 PE=1 SV=2	55	25	63	25	452	51.3	8.32
P07954	High	Fumarate hydratase, mitochondrial OS=Homo sapiens OX=9606 GN=FH PE=1 SV=3	56	18	53	18	510	54.6	8.76
O75390	High	Citrate synthase, mitochondrial OS=Homo sapiens OX=9606 GN=CS PE=1 SV=2	59	21	71	14	466	51.7	8.32
E7EVA0	High	Microtubule-associated protein OS=Homo sapiens OX=9606 GN=MAP4 PE=1 SV=1	21	32	48	32	2297	245.3	6.23
P54577	High	Tyrosine--tRNA ligase, cytoplasmic OS=Homo sapiens OX=9606 GN=YARS PE=1 SV=4	57	28	67	28	528	59.1	7.05
Q15021	High	Condensin complex subunit 1 OS=Homo sapiens OX=9606 GN=NCAPD2 PE=1 SV=3	38	38	44	38	1401	157.1	6.61
Q8WUM4	High	Programmed cell death 6-interacting protein OS=Homo sapiens OX=9606 GN=PDCD6IP PE=1 SV=1	44	32	46	32	868	96	6.52
P63104	High	14-3-3 protein zeta/delta OS=Homo sapiens OX=9606 GN=YWHAZ PE=1 SV=1	69	17	97	12	245	27.7	4.79
Q9Y678	High	Coatomer subunit gamma-1 OS=Homo sapiens OX=9606 GN=COPG1 PE=1 SV=1	51	29	42	26	874	97.7	5.47
Q9H0A0	High	RNA cytidine acetyltransferase OS=Homo sapiens OX=9606 GN=NAT10 PE=1 SV=2	46	32	49	32	1025	115.7	8.27
P22626	High	Heterogeneous nuclear ribonucleoproteins A2/B1 OS=Homo sapiens OX=9606 GN=HNRNPA2B1 PE=1 SV=2	59	19	89	16	353	37.4	8.95
P54819	High	Adenylate kinase 2, mitochondrial OS=Homo sapiens OX=9606 GN=AK2 PE=1 SV=2	68	14	60	4	239	26.5	7.81
P52948	High	Nuclear pore complex protein Nup98-Nup96 OS=Homo sapiens OX=9606 GN=NUP98 PE=1 SV=4	25	33	49	33	1817	197.5	6.4
Q16719	High	Kynureninase OS=Homo sapiens OX=9606 GN=KYNU PE=1 SV=1	49	20	52	20	465	52.3	7.03
P53618	High	Coatomer subunit beta OS=Homo sapiens OX=9606 GN=COPB1 PE=1 SV=3	41	28	47	28	953	107.1	6.05
P35221	High	Catenin alpha-1 OS=Homo sapiens OX=9606 GN=CTNNA1 PE=1 SV=1	44	28	39	28	906	100	6.29
Q13263	High	Transcription intermediary factor 1-beta OS=Homo sapiens OX=9606 GN=TRIM28 PE=1 SV=5	54	22	43	22	835	88.5	5.77
Q9Y2X3	High	Nucleolar protein 58 OS=Homo sapiens OX=9606 GN=NOP58 PE=1 SV=1	53	22	56	22	529	59.5	8.92
Q8N1F7	High	Nuclear pore complex protein Nup93 OS=Homo sapiens OX=9606 GN=NUP93 PE=1 SV=2	46	32	49	32	819	93.4	5.72
P05091	High	Aldehyde dehydrogenase, mitochondrial OS=Homo sapiens OX=9606 GN=ALDH2 PE=1 SV=2	59	21	63	20	517	56.3	7.05
P22695	High	Cytochrome b-c1 complex subunit 2, mitochondrial OS=Homo sapiens OX=9606 GN=UQCRC2 PE=1 SV=3	57	18	60	18	453	48.4	8.63
P49736	High	DNA replication licensing factor MCM2 OS=Homo sapiens OX=9606 GN=MCM2 PE=1 SV=4	44	29	45	29	904	101.8	5.52
P51149	High	Ras-related protein Rab-7a OS=Homo sapiens OX=9606 GN=RAB7A PE=1 SV=1	80	17	58	17	207	23.5	6.7
P52789	High	Hexokinase-2 OS=Homo sapiens OX=9606 GN=HK2 PE=1 SV=2	43	30	42	27	917	102.3	6.05
Q15233	High	Non-POU domain-containing octamer-binding protein OS=Homo sapiens OX=9606 GN=NONO PE=1 SV=4	47	20	64	18	471	54.2	8.95
Q16658	High	Fascin OS=Homo sapiens OX=9606 GN=FSCN1 PE=1 SV=3	52	22	52	22	493	54.5	7.24
P33993	High	DNA replication licensing factor MCM7 OS=Homo sapiens OX=9606 GN=MCM7 PE=1 SV=4	49	23	42	23	719	81.3	6.46
Q9H583	High	HEAT repeat-containing protein 1 OS=Homo sapiens OX=9606 GN=HEATR1 PE=1 SV=3	23	34	47	34	2144	242.2	6.54
P23396	High	40S ribosomal protein S3 OS=Homo sapiens OX=9606 GN=RPS3 PE=1 SV=2	80	19	85	19	243	26.7	9.66
P12268	High	Inosine-5'-monophosphate dehydrogenase 2 OS=Homo sapiens OX=9606 GN=IMPDH2 PE=1 SV=2	56	21	43	19	514	55.8	6.9
A0A2R8Y5S7	High	Radixin OS=Homo sapiens OX=9606 GN=RDX PE=1 SV=1	42	24	54	12	590	69.3	6.27
Q5JPE7	High	Nodal modulator 2 OS=Homo sapiens OX=9606 GN=NOMO2 PE=1 SV=1	37	29	42	2	1267	139.4	5.76
Q13428	High	Treacle protein OS=Homo sapiens OX=9606 GN=TCOF1 PE=1 SV=3	27	39	52	4	1488	152	9.04
A0A3B3IUD7	High	Programmed cell death 11, isoform CRA_a OS=Homo sapiens OX=9606 GN=PDCD11 PE=1 SV=1	26	34	45	34	1872	208.7	8.87
A0A087X117	High	Nodal modulator 1 OS=Homo sapiens OX=9606 GN=NOMO1 PE=1 SV=1	37	29	43	2	1267	139.4	5.85
P16403	High	Histone H1.2 OS=Homo sapiens OX=9606 GN=H1-2 PE=1 SV=2	52	19	103	5	213	21.4	10.93
P61158	High	Actin-related protein 3 OS=Homo sapiens OX=9606 GN=ACTR3 PE=1 SV=3	60	21	59	18	418	47.3	5.88
Q32Q12	High	Nucleoside diphosphate kinase OS=Homo sapiens OX=9606 GN=NME1-NME2 PE=1 SV=1	77	17	70	8	292	32.6	8.48
P09874	High	Poly [ADP-ribose] polymerase 1 OS=Homo sapiens OX=9606 GN=PARP1 PE=1 SV=4	38	30	44	30	1014	113	8.88
A0A0U1RRM4	High	Polypyrimidine tract-binding protein 1 OS=Homo sapiens OX=9606 GN=PTBP1 PE=1 SV=1	47	18	53	15	588	62.4	9.1
Q9Y230	High	RuvB-like 2 OS=Homo sapiens OX=9606 GN=RUVBL2 PE=1 SV=3	67	24	49	24	463	51.1	5.64
Q9UQE7	High	Structural maintenance of chromosomes protein 3 OS=Homo sapiens OX=9606 GN=SMC3 PE=1 SV=2	31	33	42	33	1217	141.5	7.18
Q06830	High	Peroxiredoxin-1 OS=Homo sapiens OX=9606 GN=PRDX1 PE=1 SV=1	64	14	85	10	199	22.1	8.13
Q13501	High	Sequestosome-1 OS=Homo sapiens OX=9606 GN=SQSTM1 PE=1 SV=1	70	17	71	17	440	47.7	5.22
O95373	High	Importin-7 OS=Homo sapiens OX=9606 GN=IPO7 PE=1 SV=1	34	24	45	23	1038	119.4	4.82
Q9UQ80	High	Proliferation-associated protein 2G4 OS=Homo sapiens OX=9606 GN=PA2G4 PE=1 SV=3	65	19	59	19	394	43.8	6.55
P05198	High	Eukaryotic translation initiation factor 2 subunit 1 OS=Homo sapiens OX=9606 GN=EIF2S1 PE=1 SV=3	60	18	48	18	315	36.1	5.08
P45880	High	Voltage-dependent anion-selective channel protein 2 OS=Homo sapiens OX=9606 GN=VDAC2 PE=1 SV=2	62	13	73	13	294	31.5	7.56
P10412	High	Histone H1.4 OS=Homo sapiens OX=9606 GN=H1-4 PE=1 SV=2	51	20	101	5	219	21.9	11.03
O00429	High	Dynamin-1-like protein OS=Homo sapiens OX=9606 GN=DNM1L PE=1 SV=2	56	27	39	27	736	81.8	6.81
Q01518	High	Adenylyl cyclase-associated protein 1 OS=Homo sapiens OX=9606 GN=CAP1 PE=1 SV=5	48	20	54	14	475	51.9	8.06
Q13200	High	26S proteasome non-ATPase regulatory subunit 2 OS=Homo sapiens OX=9606 GN=PSMD2 PE=1 SV=3	42	27	43	27	908	100.1	5.2
P54136	High	Arginine--tRNA ligase, cytoplasmic OS=Homo sapiens OX=9606 GN=RARS PE=1 SV=2	57	31	47	31	660	75.3	6.68
O75083	High	WD repeat-containing protein 1 OS=Homo sapiens OX=9606 GN=WDR1 PE=1 SV=4	51	24	51	24	606	66.2	6.65
Q99497	High	Protein/nucleic acid deglycase DJ-1 OS=Homo sapiens OX=9606 GN=PARK7 PE=1 SV=2	81	17	54	17	189	19.9	6.79
A0A087X1N8	High	Serpin B6 OS=Homo sapiens OX=9606 GN=SERPINB6 PE=1 SV=1	59	18	44	18	395	44.8	5.68
O14980	High	Exportin-1 OS=Homo sapiens OX=9606 GN=XPO1 PE=1 SV=1	30	21	44	21	1071	123.3	6.06
P16402	High	Histone H1.3 OS=Homo sapiens OX=9606 GN=H1-3 PE=1 SV=2	50	19	89	6	221	22.3	11.02
P55084	High	Trifunctional enzyme subunit beta, mitochondrial OS=Homo sapiens OX=9606 GN=HADHB PE=1 SV=3	59	22	56	22	474	51.3	9.41
F8VVM2	High	Phosphate carrier protein, mitochondrial OS=Homo sapiens OX=9606 GN=SLC25A3 PE=1 SV=1	50	14	64	1	324	36.1	9.26
Q92945	High	Far upstream element-binding protein 2 OS=Homo sapiens OX=9606 GN=KHSRP PE=1 SV=4	42	25	52	23	711	73.1	7.3
P07339	High	Cathepsin D OS=Homo sapiens OX=9606 GN=CTSD PE=1 SV=1	46	15	61	15	412	44.5	6.54
O75874	High	Isocitrate dehydrogenase [NADP] cytoplasmic OS=Homo sapiens OX=9606 GN=IDH1 PE=1 SV=2	65	22	54	22	414	46.6	7.01
P55884	High	Eukaryotic translation initiation factor 3 subunit B OS=Homo sapiens OX=9606 GN=EIF3B PE=1 SV=3	34	21	46	14	814	92.4	5
P05556	High	Integrin beta-1 OS=Homo sapiens OX=9606 GN=ITGB1 PE=1 SV=2	35	21	47	21	798	88.4	5.39
A0A2U3TZU2	High	Glucose-6-phosphate isomerase OS=Homo sapiens OX=9606 GN=GPI PE=1 SV=1	40	19	50	19	597	67.2	8.97
P15880	High	40S ribosomal protein S2 OS=Homo sapiens OX=9606 GN=RPS2 PE=1 SV=2	54	17	59	17	293	31.3	10.24
H7BXI1	High	Extended synaptotagmin-2 OS=Homo sapiens OX=9606 GN=ESYT2 PE=1 SV=2	33	19	41	19	866	96.3	8.43
F8VZX2	High	Poly(rC)-binding protein 2 OS=Homo sapiens OX=9606 GN=PCBP2 PE=1 SV=1	75	16	56	1	321	33.8	8.24
P27105	High	Erythrocyte band 7 integral membrane protein OS=Homo sapiens OX=9606 GN=STOM PE=1 SV=3	64	14	60	14	288	31.7	7.88
P27348	High	14-3-3 protein theta OS=Homo sapiens OX=9606 GN=YWHAQ PE=1 SV=1	57	15	78	9	245	27.7	4.78
E7ETY2	High	Treacle protein OS=Homo sapiens OX=9606 GN=TCOF1 PE=1 SV=1	26	37	49	2	1488	152.2	8.85
P49321	High	Nuclear autoantigenic sperm protein OS=Homo sapiens OX=9606 GN=NASP PE=1 SV=2	52	26	42	25	788	85.2	4.3
Q15293	High	Reticulocalbin-1 OS=Homo sapiens OX=9606 GN=RCN1 PE=1 SV=1	51	14	48	14	331	38.9	5
O95831	High	Apoptosis-inducing factor 1, mitochondrial OS=Homo sapiens OX=9606 GN=AIFM1 PE=1 SV=1	46	19	53	19	613	66.9	8.95
O75439	High	Mitochondrial-processing peptidase subunit beta OS=Homo sapiens OX=9606 GN=PMPCB PE=1 SV=2	51	18	39	17	489	54.3	6.83
Q9BTV4	High	Transmembrane protein 43 OS=Homo sapiens OX=9606 GN=TMEM43 PE=1 SV=1	55	17	48	17	400	44.8	8.13
G3V2Y4	High	Serine hydroxymethyltransferase, mitochondrial (Fragment) OS=Homo sapiens OX=9606 GN=SHMT2 PE=1 SV=1	78	14	55	1	234	25.7	9.58
Q13011	High	Delta(3,5)-Delta(2,4)-dienoyl-CoA isomerase, mitochondrial OS=Homo sapiens OX=9606 GN=ECH1 PE=1 SV=2	74	18	50	18	328	35.8	8
P33992	High	DNA replication licensing factor MCM5 OS=Homo sapiens OX=9606 GN=MCM5 PE=1 SV=5	46	27	42	27	734	82.2	8.37
A0A140T912	High	HLA class I histocompatibility antigen, C alpha chain OS=Homo sapiens OX=9606 GN=HLA-C PE=1 SV=1	43	12	46	2	372	41.4	6.39
P17655	High	Calpain-2 catalytic subunit OS=Homo sapiens OX=9606 GN=CAPN2 PE=1 SV=6	45	20	39	20	700	79.9	4.98
O00299	High	Chloride intracellular channel protein 1 OS=Homo sapiens OX=9606 GN=CLIC1 PE=1 SV=4	77	14	45	13	241	26.9	5.17
P14923	High	Junction plakoglobin OS=Homo sapiens OX=9606 GN=JUP PE=1 SV=3	46	23	35	19	745	81.7	6.14
A0A0G2JH68	High	Protein diaphanous homolog 1 OS=Homo sapiens OX=9606 GN=DIAPH1 PE=1 SV=1	30	28	39	28	1272	141.3	5.39
A0A494C1M4	High	10-formyltetrahydrofolate dehydrogenase OS=Homo sapiens OX=9606 GN=ALDH1L2 PE=1 SV=1	38	24	41	23	932	102.8	6.57
P80723	High	Brain acid soluble protein 1 OS=Homo sapiens OX=9606 GN=BASP1 PE=1 SV=2	85	16	57	16	227	22.7	4.63
P46777	High	60S ribosomal protein L5 OS=Homo sapiens OX=9606 GN=RPL5 PE=1 SV=3	55	15	53	15	297	34.3	9.72
A0A0C4DG17	High	40S ribosomal protein SA OS=Homo sapiens OX=9606 GN=RPSA PE=1 SV=1	51	12	49	12	300	33.3	4.87
A2A274	High	Aconitate hydratase, mitochondrial OS=Homo sapiens OX=9606 GN=ACO2 PE=1 SV=1	43	28	41	28	805	87.8	7.37
F8W914	High	Reticulon OS=Homo sapiens OX=9606 GN=RTN4 PE=1 SV=1	44	9	59	9	345	37.1	4.77
P30040	High	Endoplasmic reticulum resident protein 29 OS=Homo sapiens OX=9606 GN=ERP29 PE=1 SV=4	56	12	63	12	261	29	7.31
Q9UNX4	High	WD repeat-containing protein 3 OS=Homo sapiens OX=9606 GN=WDR3 PE=1 SV=1	40	26	42	26	943	106	6.64
Q07021	High	Complement component 1 Q subcomponent-binding protein, mitochondrial OS=Homo sapiens OX=9606 GN=C1QBP PE=1 SV=1	61	9	67	9	282	31.3	4.84
Q15366	High	Poly(rC)-binding protein 2 OS=Homo sapiens OX=9606 GN=PCBP2 PE=1 SV=1	66	16	55	1	365	38.6	6.79
P02533	High	Keratin, type I cytoskeletal 14 OS=Homo sapiens OX=9606 GN=KRT14 PE=1 SV=4	38	19	80	4	472	51.5	5.16
Q13838	High	Spliceosome RNA helicase DDX39B OS=Homo sapiens OX=9606 GN=DDX39B PE=1 SV=1	56	21	41	9	428	49	5.67
P38117	High	Electron transfer flavoprotein subunit beta OS=Homo sapiens OX=9606 GN=ETFB PE=1 SV=3	62	17	70	17	255	27.8	8.1
Q15181	High	Inorganic pyrophosphatase OS=Homo sapiens OX=9606 GN=PPA1 PE=1 SV=2	71	17	49	15	289	32.6	5.86
Q86UP2	High	Kinectin OS=Homo sapiens OX=9606 GN=KTN1 PE=1 SV=1	33	33	42	33	1357	156.2	5.64
Q00325	High	Phosphate carrier protein, mitochondrial OS=Homo sapiens OX=9606 GN=SLC25A3 PE=1 SV=2	40	15	61	2	362	40.1	9.38
Q14195	High	Dihydropyrimidinase-related protein 3 OS=Homo sapiens OX=9606 GN=DPYSL3 PE=1 SV=1	50	18	42	15	570	61.9	6.49
P33176	High	Kinesin-1 heavy chain OS=Homo sapiens OX=9606 GN=KIF5B PE=1 SV=1	44	30	39	30	963	109.6	6.51
Q13435	High	Splicing factor 3B subunit 2 OS=Homo sapiens OX=9606 GN=SF3B2 PE=1 SV=2	39	26	39	26	895	100.2	5.67
O95347	High	Structural maintenance of chromosomes protein 2 OS=Homo sapiens OX=9606 GN=SMC2 PE=1 SV=2	37	33	41	33	1197	135.6	8.43
A0A494C1K3	High	General transcription factor II-I OS=Homo sapiens OX=9606 GN=GTF2I PE=1 SV=1	34	29	43	28	1159	131	8.69
P14868	High	Aspartate--tRNA ligase, cytoplasmic OS=Homo sapiens OX=9606 GN=DARS PE=1 SV=2	52	22	47	22	501	57.1	6.55
P08559	High	Pyruvate dehydrogenase E1 component subunit alpha, somatic form, mitochondrial OS=Homo sapiens OX=9606 GN=PDHA1 PE=1 SV=3	50	18	53	18	390	43.3	8.06
P31946	High	14-3-3 protein beta/alpha OS=Homo sapiens OX=9606 GN=YWHAB PE=1 SV=3	74	16	78	9	246	28.1	4.83
Q9Y617	High	Phosphoserine aminotransferase OS=Homo sapiens OX=9606 GN=PSAT1 PE=1 SV=2	61	18	45	18	370	40.4	7.66
O75691	High	Small subunit processome component 20 homolog OS=Homo sapiens OX=9606 GN=UTP20 PE=1 SV=3	17	30	35	30	2785	318.2	7.39
P18124	High	60S ribosomal protein L7 OS=Homo sapiens OX=9606 GN=RPL7 PE=1 SV=1	59	18	56	18	248	29.2	10.65
P42167	High	Lamina-associated polypeptide 2, isoforms beta/gamma OS=Homo sapiens OX=9606 GN=TMPO PE=1 SV=2	56	18	45	10	454	50.6	9.38
O75955	High	Flotillin-1 OS=Homo sapiens OX=9606 GN=FLOT1 PE=1 SV=3	54	19	38	19	427	47.3	7.49
P35998	High	26S proteasome regulatory subunit 7 OS=Homo sapiens OX=9606 GN=PSMC2 PE=1 SV=3	54	20	40	20	433	48.6	5.95
P00387	High	NADH-cytochrome b5 reductase 3 OS=Homo sapiens OX=9606 GN=CYB5R3 PE=1 SV=3	75	17	48	17	301	34.2	7.59
P15121	High	Aldo-keto reductase family 1 member B1 OS=Homo sapiens OX=9606 GN=AKR1B1 PE=1 SV=3	80	17	56	16	316	35.8	6.98
P62424	High	60S ribosomal protein L7a OS=Homo sapiens OX=9606 GN=RPL7A PE=1 SV=2	56	18	53	18	266	30	10.61
P17858	High	ATP-dependent 6-phosphofructokinase, liver type OS=Homo sapiens OX=9606 GN=PFKL PE=1 SV=6	40	22	35	17	780	85	7.5
Q9BZE4	High	Nucleolar GTP-binding protein 1 OS=Homo sapiens OX=9606 GN=GTPBP4 PE=1 SV=3	42	22	45	22	634	73.9	9.5
P05388	High	60S acidic ribosomal protein P0 OS=Homo sapiens OX=9606 GN=RPLP0 PE=1 SV=1	56	14	57	14	317	34.3	5.97
P09525	High	Annexin A4 OS=Homo sapiens OX=9606 GN=ANXA4 PE=1 SV=4	58	15	43	14	319	35.9	6.13
Q9UHB6	High	LIM domain and actin-binding protein 1 OS=Homo sapiens OX=9606 GN=LIMA1 PE=1 SV=1	44	26	41	26	759	85.2	6.84
P07996	High	Thrombospondin-1 OS=Homo sapiens OX=9606 GN=THBS1 PE=1 SV=2	28	24	42	23	1170	129.3	4.94
P42166	High	Lamina-associated polypeptide 2, isoform alpha OS=Homo sapiens OX=9606 GN=TMPO PE=1 SV=2	53	21	39	13	694	75.4	7.66
O75367	High	Core histone macro-H2A.1 OS=Homo sapiens OX=9606 GN=H2AFY PE=1 SV=4	55	17	49	15	372	39.6	9.79
Q13310	High	Polyadenylate-binding protein 4 OS=Homo sapiens OX=9606 GN=PABPC4 PE=1 SV=1	36	21	46	2	644	70.7	9.26
P50570	High	Dynamin-2 OS=Homo sapiens OX=9606 GN=DNM2 PE=1 SV=2	48	29	38	19	870	98	7.44
P35606	High	Coatomer subunit beta' OS=Homo sapiens OX=9606 GN=COPB2 PE=1 SV=2	44	26	36	26	906	102.4	5.27
Q71DI3	High	Histone H3.2 OS=Homo sapiens OX=9606 GN=HIST2H3A PE=1 SV=3	68	12	93	2	136	15.4	11.27
P51148	High	Ras-related protein Rab-5C OS=Homo sapiens OX=9606 GN=RAB5C PE=1 SV=2	69	10	40	7	216	23.5	8.41
B7ZM99	High	MTHFD1L protein OS=Homo sapiens OX=9606 GN=MTHFD1L PE=1 SV=1	40	25	39	25	979	105.8	8.06
P29317	High	Ephrin type-A receptor 2 OS=Homo sapiens OX=9606 GN=EPHA2 PE=1 SV=2	45	27	41	26	976	108.2	6.23
Q02790	High	Peptidyl-prolyl cis-trans isomerase FKBP4 OS=Homo sapiens OX=9606 GN=FKBP4 PE=1 SV=3	68	24	42	24	459	51.8	5.43
P14866	High	Heterogeneous nuclear ribonucleoprotein L OS=Homo sapiens OX=9606 GN=HNRNPL PE=1 SV=2	52	17	45	1	589	64.1	8.22
Q9Y5M8	High	Signal recognition particle receptor subunit beta OS=Homo sapiens OX=9606 GN=SRPRB PE=1 SV=3	65	16	42	16	271	29.7	9.04
Q8NBS9	High	Thioredoxin domain-containing protein 5 OS=Homo sapiens OX=9606 GN=TXNDC5 PE=1 SV=2	47	17	46	17	432	47.6	5.97
P43246	High	DNA mismatch repair protein Msh2 OS=Homo sapiens OX=9606 GN=MSH2 PE=1 SV=1	40	24	33	24	934	104.7	5.77
Q6UVK1	High	Chondroitin sulfate proteoglycan 4 OS=Homo sapiens OX=9606 GN=CSPG4 PE=1 SV=2	16	23	37	23	2322	250.4	5.47
P46087	High	Probable 28S rRNA (cytosine(4447)-C(5))-methyltransferase OS=Homo sapiens OX=9606 GN=NOP2 PE=1 SV=2	42	22	45	18	812	89.2	9.23
P35613	High	Basigin OS=Homo sapiens OX=9606 GN=BSG PE=1 SV=2	34	10	43	10	385	42.2	5.66
A0A140T913	High	HLA class I histocompatibility antigen, A alpha chain OS=Homo sapiens OX=9606 GN=HLA-A PE=1 SV=1	37	13	43	8	371	41.4	6.99
Q96RP9	High	Elongation factor G, mitochondrial OS=Homo sapiens OX=9606 GN=GFM1 PE=1 SV=2	44	25	38	25	751	83.4	7.01
P17980	High	26S proteasome regulatory subunit 6A OS=Homo sapiens OX=9606 GN=PSMC3 PE=1 SV=3	68	22	40	22	439	49.2	5.24
A0A024R4E5	High	High density lipoprotein binding protein (Vigilin), isoform CRA_a OS=Homo sapiens OX=9606 GN=HDLBP PE=1 SV=1	29	25	31	25	1268	141.4	6.87
G8JLB6	High	Heterogeneous nuclear ribonucleoprotein H OS=Homo sapiens OX=9606 GN=HNRNPH1 PE=1 SV=1	51	15	55	8	472	51.2	6.8
P43121	High	Cell surface glycoprotein MUC18 OS=Homo sapiens OX=9606 GN=MCAM PE=1 SV=2	38	20	45	20	646	71.6	5.76
P62906	High	60S ribosomal protein L10a OS=Homo sapiens OX=9606 GN=RPL10A PE=1 SV=2	46	12	50	12	217	24.8	9.94
Q8N766	High	ER membrane protein complex subunit 1 OS=Homo sapiens OX=9606 GN=EMC1 PE=1 SV=1	41	25	36	25	993	111.7	7.66
Q13162	High	Peroxiredoxin-4 OS=Homo sapiens OX=9606 GN=PRDX4 PE=1 SV=1	65	14	50	11	271	30.5	6.29
P41091	High	Eukaryotic translation initiation factor 2 subunit 3 OS=Homo sapiens OX=9606 GN=EIF2S3 PE=1 SV=3	52	19	41	19	472	51.1	8.4
Q9UJZ1	High	Stomatin-like protein 2, mitochondrial OS=Homo sapiens OX=9606 GN=STOML2 PE=1 SV=1	57	15	45	15	356	38.5	7.39
Q8WX93	High	Palladin OS=Homo sapiens OX=9606 GN=PALLD PE=1 SV=3	25	24	38	23	1383	150.5	7.09
P04181	High	Ornithine aminotransferase, mitochondrial OS=Homo sapiens OX=9606 GN=OAT PE=1 SV=1	49	16	42	16	439	48.5	7.03
P62195	High	26S proteasome regulatory subunit 8 OS=Homo sapiens OX=9606 GN=PSMC5 PE=1 SV=1	57	20	45	19	406	45.6	7.55
P32969	High	60S ribosomal protein L9 OS=Homo sapiens OX=9606 GN=RPL9 PE=1 SV=1	71	12	38	12	192	21.9	9.95
Q5JTH9	High	RRP12-like protein OS=Homo sapiens OX=9606 GN=RRP12 PE=1 SV=2	26	24	37	23	1297	143.6	8.75
Q9UKV3	High	Apoptotic chromatin condensation inducer in the nucleus OS=Homo sapiens OX=9606 GN=ACIN1 PE=1 SV=2	23	23	46	21	1341	151.8	6.43
Q9NU22	High	Midasin OS=Homo sapiens OX=9606 GN=MDN1 PE=1 SV=2	9	30	35	30	5596	632.4	5.68
P46459	High	Vesicle-fusing ATPase OS=Homo sapiens OX=9606 GN=NSF PE=1 SV=3	36	22	33	22	744	82.5	6.95
Q9Y4W6	High	AFG3-like protein 2 OS=Homo sapiens OX=9606 GN=AFG3L2 PE=1 SV=2	39	29	41	29	797	88.5	8.66
C9JMB8	High	Dynamin-like 120 kDa protein, mitochondrial OS=Homo sapiens OX=9606 GN=OPA1 PE=1 SV=2	35	26	36	20	972	112.6	7.88
A0A3B3ITJ4	High	Heterogeneous nuclear ribonucleoprotein L (Fragment) OS=Homo sapiens OX=9606 GN=HNRNPL PE=1 SV=1	54	17	43	1	537	59.2	7.11
P10515	High	Dihydrolipoyllysine-residue acetyltransferase component of pyruvate dehydrogenase complex, mitochondrial OS=Homo sapiens OX=9606 GN=DLAT PE=1 SV=3	41	18	37	18	647	69	7.84
Q02878	High	60S ribosomal protein L6 OS=Homo sapiens OX=9606 GN=RPL6 PE=1 SV=3	53	18	54	18	288	32.7	10.58
Q562R1	High	Beta-actin-like protein 2 OS=Homo sapiens OX=9606 GN=ACTBL2 PE=1 SV=2	27	10	145	3	376	42	5.59
P21281	High	V-type proton ATPase subunit B, brain isoform OS=Homo sapiens OX=9606 GN=ATP6V1B2 PE=1 SV=3	54	21	42	21	511	56.5	5.81
P05387	High	60S acidic ribosomal protein P2 OS=Homo sapiens OX=9606 GN=RPLP2 PE=1 SV=1	85	8	47	7	115	11.7	4.54
Q9C0C2	High	182 kDa tankyrase-1-binding protein OS=Homo sapiens OX=9606 GN=TNKS1BP1 PE=1 SV=4	28	29	34	29	1729	181.7	4.86
P05455	High	Lupus La protein OS=Homo sapiens OX=9606 GN=SSB PE=1 SV=2	44	19	47	19	408	46.8	7.12
P12429	High	Annexin A3 OS=Homo sapiens OX=9606 GN=ANXA3 PE=1 SV=3	65	17	44	17	323	36.4	5.92
P06899	High	Histone H2B type 1-J OS=Homo sapiens OX=9606 GN=H2BC11 PE=1 SV=3	56	13	130	3	126	13.9	10.32
P15924	High	Desmoplakin OS=Homo sapiens OX=9606 GN=DSP PE=1 SV=3	15	28	36	28	2871	331.6	6.81
Q6P2E9	High	Enhancer of mRNA-decapping protein 4 OS=Homo sapiens OX=9606 GN=EDC4 PE=1 SV=1	29	21	27	21	1401	151.6	5.86
Q92973	High	Transportin-1 OS=Homo sapiens OX=9606 GN=TNPO1 PE=1 SV=2	31	19	39	15	898	102.3	4.98
Q15046	High	Lysine--tRNA ligase OS=Homo sapiens OX=9606 GN=KARS1 PE=1 SV=3	39	22	37	22	597	68	6.35
Q99459	High	Cell division cycle 5-like protein OS=Homo sapiens OX=9606 GN=CDC5L PE=1 SV=2	39	19	31	19	802	92.2	8.18
P11387	High	DNA topoisomerase 1 OS=Homo sapiens OX=9606 GN=TOP1 PE=1 SV=2	35	26	43	26	765	90.7	9.31
E9PRY8	High	Elongation factor 1-delta OS=Homo sapiens OX=9606 GN=EEF1D PE=1 SV=1	31	17	40	8	697	76.5	7.05
U3KQK0	High	Histone H2B OS=Homo sapiens OX=9606 GN=H2BC15 PE=1 SV=1	42	13	137	3	166	18.8	10.54
P13489	High	Ribonuclease inhibitor OS=Homo sapiens OX=9606 GN=RNH1 PE=1 SV=2	59	16	37	16	461	49.9	4.82
P52701	High	DNA mismatch repair protein Msh6 OS=Homo sapiens OX=9606 GN=MSH6 PE=1 SV=2	25	25	36	25	1360	152.7	6.9
P30084	High	Enoyl-CoA hydratase, mitochondrial OS=Homo sapiens OX=9606 GN=ECHS1 PE=1 SV=4	66	14	47	14	290	31.4	8.07
Q96QK1	High	Vacuolar protein sorting-associated protein 35 OS=Homo sapiens OX=9606 GN=VPS35 PE=1 SV=2	37	22	38	21	796	91.6	5.49
P04792	High	Heat shock protein beta-1 OS=Homo sapiens OX=9606 GN=HSPB1 PE=1 SV=2	85	14	58	14	205	22.8	6.4
Q6YN16	High	Hydroxysteroid dehydrogenase-like protein 2 OS=Homo sapiens OX=9606 GN=HSDL2 PE=1 SV=1	60	20	36	20	418	45.4	7.99
P54578	High	Ubiquitin carboxyl-terminal hydrolase 14 OS=Homo sapiens OX=9606 GN=USP14 PE=1 SV=3	47	21	38	21	494	56	5.3
P62701	High	40S ribosomal protein S4, X isoform OS=Homo sapiens OX=9606 GN=RPS4X PE=1 SV=2	54	15	54	15	263	29.6	10.15
P17812	High	CTP synthase 1 OS=Homo sapiens OX=9606 GN=CTPS1 PE=1 SV=2	45	22	45	21	591	66.6	6.46
P61981	High	14-3-3 protein gamma OS=Homo sapiens OX=9606 GN=YWHAG PE=1 SV=2	77	15	60	10	247	28.3	4.89
P30044	High	Peroxiredoxin-5, mitochondrial OS=Homo sapiens OX=9606 GN=PRDX5 PE=1 SV=4	66	11	48	11	214	22.1	8.7
F8VY04	High	Adenylate kinase 2, mitochondrial OS=Homo sapiens OX=9606 GN=AK2 PE=1 SV=1	62	11	42	1	190	21.2	6.95
Q8WYP5	High	Protein ELYS OS=Homo sapiens OX=9606 GN=AHCTF1 PE=1 SV=3	22	32	35	32	2266	252.3	6.6
P38606	High	V-type proton ATPase catalytic subunit A OS=Homo sapiens OX=9606 GN=ATP6V1A PE=1 SV=2	57	20	33	20	617	68.3	5.52
O95757	High	Heat shock 70 kDa protein 4L OS=Homo sapiens OX=9606 GN=HSPA4L PE=1 SV=3	35	19	34	14	839	94.5	5.88
P61224	High	Ras-related protein Rap-1b OS=Homo sapiens OX=9606 GN=RAP1B PE=1 SV=1	60	11	27	3	184	20.8	5.78
O15067	High	Phosphoribosylformylglycinamidine synthase OS=Homo sapiens OX=9606 GN=PFAS PE=1 SV=4	23	20	26	20	1338	144.6	5.76
P61247	High	40S ribosomal protein S3a OS=Homo sapiens OX=9606 GN=RPS3A PE=1 SV=2	65	18	54	18	264	29.9	9.73
P62979	High	Ubiquitin-40S ribosomal protein S27a OS=Homo sapiens OX=9606 GN=RPS27A PE=1 SV=2	67	14	137	3	156	18	9.64
O43776	High	Asparagine--tRNA ligase, cytoplasmic OS=Homo sapiens OX=9606 GN=NARS1 PE=1 SV=1	39	17	35	17	548	62.9	6.25
P50213	High	Isocitrate dehydrogenase [NAD] subunit alpha, mitochondrial OS=Homo sapiens OX=9606 GN=IDH3A PE=1 SV=1	45	15	41	15	366	39.6	6.92
Q8NE71	High	ATP-binding cassette sub-family F member 1 OS=Homo sapiens OX=9606 GN=ABCF1 PE=1 SV=2	36	19	36	13	845	95.9	6.8
Q9Y5B9	High	FACT complex subunit SPT16 OS=Homo sapiens OX=9606 GN=SUPT16H PE=1 SV=1	30	25	34	25	1047	119.8	5.66
P52907	High	F-actin-capping protein subunit alpha-1 OS=Homo sapiens OX=9606 GN=CAPZA1 PE=1 SV=3	62	10	38	8	286	32.9	5.69
A0A0J9YXN7	High	Perilipin-4 OS=Homo sapiens OX=9606 GN=PLIN4 PE=1 SV=1	39	28	32	28	1372	135.9	8.82
J3KN16	High	Proteasome adapter and scaffold protein ECM29 OS=Homo sapiens OX=9606 GN=ECPAS PE=1 SV=1	24	31	32	31	2017	223.6	8.75
P28838	High	Cytosol aminopeptidase OS=Homo sapiens OX=9606 GN=LAP3 PE=1 SV=3	62	24	32	24	519	56.1	7.93
H0YI37	High	ATP synthase subunit beta, mitochondrial (Fragment) OS=Homo sapiens OX=9606 GN=ATP5F1B PE=1 SV=1	86	7	73	1	133	13.9	5.82
Q92499	High	ATP-dependent RNA helicase DDX1 OS=Homo sapiens OX=9606 GN=DDX1 PE=1 SV=2	39	21	33	21	740	82.4	7.23
Q6NUK1	High	Calcium-binding mitochondrial carrier protein SCaMC-1 OS=Homo sapiens OX=9606 GN=SLC25A24 PE=1 SV=2	51	17	31	17	477	53.3	6.33
P62917	High	60S ribosomal protein L8 OS=Homo sapiens OX=9606 GN=RPL8 PE=1 SV=2	59	15	52	15	257	28	11.03
P67936	High	Tropomyosin alpha-4 chain OS=Homo sapiens OX=9606 GN=TPM4 PE=1 SV=3	61	19	54	6	248	28.5	4.69
P13929	High	Beta-enolase OS=Homo sapiens OX=9606 GN=ENO3 PE=1 SV=5	31	10	77	4	434	47	7.71
P63241	High	Eukaryotic translation initiation factor 5A-1 OS=Homo sapiens OX=9606 GN=EIF5A PE=1 SV=2	64	9	41	9	154	16.8	5.24
O96008	High	Mitochondrial import receptor subunit TOM40 homolog OS=Homo sapiens OX=9606 GN=TOMM40 PE=1 SV=1	51	11	44	11	361	37.9	7.25
P30041	High	Peroxiredoxin-6 OS=Homo sapiens OX=9606 GN=PRDX6 PE=1 SV=3	59	13	48	13	224	25	6.38
Q99536	High	Synaptic vesicle membrane protein VAT-1 homolog OS=Homo sapiens OX=9606 GN=VAT1 PE=1 SV=2	48	13	37	13	393	41.9	6.29
P47897	High	Glutamine--tRNA ligase OS=Homo sapiens OX=9606 GN=QARS PE=1 SV=1	34	20	26	1	775	87.7	7.15
Q12797	High	Aspartyl/asparaginyl beta-hydroxylase OS=Homo sapiens OX=9606 GN=ASPH PE=1 SV=3	35	20	42	20	758	85.8	5.01
Q13724	High	Mannosyl-oligosaccharide glucosidase OS=Homo sapiens OX=9606 GN=MOGS PE=1 SV=5	35	17	29	17	837	91.9	8.9
O75165	High	DnaJ homolog subfamily C member 13 OS=Homo sapiens OX=9606 GN=DNAJC13 PE=1 SV=5	16	26	30	26	2243	254.3	6.74
Q9UBG0	High	C-type mannose receptor 2 OS=Homo sapiens OX=9606 GN=MRC2 PE=1 SV=2	25	21	31	21	1479	166.6	5.83
A0A087WWU8	High	Tropomyosin alpha-3 chain OS=Homo sapiens OX=9606 GN=TPM3 PE=1 SV=1	57	17	62	12	227	26.4	4.78
Q9NTJ3	High	Structural maintenance of chromosomes protein 4 OS=Homo sapiens OX=9606 GN=SMC4 PE=1 SV=2	25	24	34	24	1288	147.1	6.79
O60264	High	SWI/SNF-related matrix-associated actin-dependent regulator of chromatin subfamily A member 5 OS=Homo sapiens OX=9606 GN=SMARCA5 PE=1 SV=1	30	25	37	25	1052	121.8	8.09
Q14240	High	Eukaryotic initiation factor 4A-II OS=Homo sapiens OX=9606 GN=EIF4A2 PE=1 SV=2	46	15	43	3	407	46.4	5.48
Q9NSE4	High	Isoleucine--tRNA ligase, mitochondrial OS=Homo sapiens OX=9606 GN=IARS2 PE=1 SV=2	36	25	37	25	1012	113.7	7.2
Q9UGP8	High	Translocation protein SEC63 homolog OS=Homo sapiens OX=9606 GN=SEC63 PE=1 SV=2	34	19	32	19	760	87.9	5.31
P23284	High	Peptidyl-prolyl cis-trans isomerase B OS=Homo sapiens OX=9606 GN=PPIB PE=1 SV=2	50	12	47	12	216	23.7	9.41
Q96AY3	High	Peptidyl-prolyl cis-trans isomerase FKBP10 OS=Homo sapiens OX=9606 GN=FKBP10 PE=1 SV=1	46	22	41	21	582	64.2	5.62
P49915	High	GMP synthase [glutamine-hydrolyzing] OS=Homo sapiens OX=9606 GN=GMPS PE=1 SV=1	49	24	29	24	693	76.7	6.87
P30837	High	Aldehyde dehydrogenase X, mitochondrial OS=Homo sapiens OX=9606 GN=ALDH1B1 PE=1 SV=3	37	17	34	16	517	57.2	6.8
P09960	High	Leukotriene A-4 hydrolase OS=Homo sapiens OX=9606 GN=LTA4H PE=1 SV=2	43	18	36	18	611	69.2	6.18
Q9Y2W1	High	Thyroid hormone receptor-associated protein 3 OS=Homo sapiens OX=9606 GN=THRAP3 PE=1 SV=2	29	25	43	25	955	108.6	10.15
P43490	High	Nicotinamide phosphoribosyltransferase OS=Homo sapiens OX=9606 GN=NAMPT PE=1 SV=1	49	18	31	18	491	55.5	7.15
P51553	High	Isocitrate dehydrogenase [NAD] subunit gamma, mitochondrial OS=Homo sapiens OX=9606 GN=IDH3G PE=1 SV=1	48	14	38	14	393	42.8	8.5
J3KTA4	High	Probable ATP-dependent RNA helicase DDX5 OS=Homo sapiens OX=9606 GN=DDX5 PE=1 SV=1	38	21	47	13	614	69	8.85
Q9NVJ2	High	ADP-ribosylation factor-like protein 8B OS=Homo sapiens OX=9606 GN=ARL8B PE=1 SV=1	74	12	35	5	186	21.5	8.43
O15061	High	Synemin OS=Homo sapiens OX=9606 GN=SYNM PE=1 SV=2	29	27	29	27	1565	172.7	5.16
O95202	High	Mitochondrial proton/calcium exchanger protein OS=Homo sapiens OX=9606 GN=LETM1 PE=1 SV=1	35	19	31	19	739	83.3	6.7
P20020	High	Plasma membrane calcium-transporting ATPase 1 OS=Homo sapiens OX=9606 GN=ATP2B1 PE=1 SV=4	24	21	30	14	1220	134.6	5.91
P49589	High	Cysteine--tRNA ligase, cytoplasmic OS=Homo sapiens OX=9606 GN=CARS PE=1 SV=3	36	20	38	19	748	85.4	6.76
B0QZ18	High	Copine-1 OS=Homo sapiens OX=9606 GN=CPNE1 PE=1 SV=1	42	13	34	13	542	59.7	6.04
A0A1B0GW77	High	Alpha-aminoadipic semialdehyde dehydrogenase OS=Homo sapiens OX=9606 GN=ALDH7A1 PE=1 SV=1	47	21	35	21	554	60	8.18
Q96A33	High	Coiled-coil domain-containing protein 47 OS=Homo sapiens OX=9606 GN=CCDC47 PE=1 SV=1	42	16	45	16	483	55.8	4.87
P18583	High	Protein SON OS=Homo sapiens OX=9606 GN=SON PE=1 SV=4	17	23	32	11	2426	263.7	5.64
P49189	High	4-trimethylaminobutyraldehyde dehydrogenase OS=Homo sapiens OX=9606 GN=ALDH9A1 PE=1 SV=3	45	16	30	16	494	53.8	5.87
P24534	High	Elongation factor 1-beta OS=Homo sapiens OX=9606 GN=EEF1B2 PE=1 SV=3	70	11	43	8	225	24.7	4.67
P12081	High	Histidine--tRNA ligase, cytoplasmic OS=Homo sapiens OX=9606 GN=HARS PE=1 SV=2	52	20	35	13	509	57.4	5.88
O60664	High	Perilipin-3 OS=Homo sapiens OX=9606 GN=PLIN3 PE=1 SV=3	57	15	29	15	434	47	5.44
P31150	High	Rab GDP dissociation inhibitor alpha OS=Homo sapiens OX=9606 GN=GDI1 PE=1 SV=2	48	16	32	8	447	50.6	5.14
A0A087WZN1	High	Isocitrate dehydrogenase [NAD] subunit, mitochondrial OS=Homo sapiens OX=9606 GN=IDH3B PE=1 SV=1	52	17	36	17	387	42.4	8.46
P16152	High	Carbonyl reductase [NADPH] 1 OS=Homo sapiens OX=9606 GN=CBR1 PE=1 SV=3	69	15	36	11	277	30.4	8.32
P52597	High	Heterogeneous nuclear ribonucleoprotein F OS=Homo sapiens OX=9606 GN=HNRNPF PE=1 SV=3	62	15	47	13	415	45.6	5.58
P07737	High	Profilin-1 OS=Homo sapiens OX=9606 GN=PFN1 PE=1 SV=2	74	12	68	12	140	15	8.27
P49591	High	Serine--tRNA ligase, cytoplasmic OS=Homo sapiens OX=9606 GN=SARS PE=1 SV=3	46	20	30	20	514	58.7	6.43
K4DI93	High	Cullin 4B, isoform CRA_e OS=Homo sapiens OX=9606 GN=CUL4B PE=1 SV=1	35	25	32	17	900	102.7	8.03
P11177	High	Pyruvate dehydrogenase E1 component subunit beta, mitochondrial OS=Homo sapiens OX=9606 GN=PDHB PE=1 SV=3	48	13	40	13	359	39.2	6.65
Q15075	High	Early endosome antigen 1 OS=Homo sapiens OX=9606 GN=EEA1 PE=1 SV=2	25	28	31	28	1411	162.4	5.68
Q5TCU3	High	Tropomyosin beta chain OS=Homo sapiens OX=9606 GN=TPM2 PE=1 SV=1	52	18	49	2	284	32.8	4.68
A0A1B0GVU9	High	Glutaminyl-tRNA synthetase 1 (Fragment) OS=Homo sapiens OX=9606 GN=QARS1 PE=1 SV=1	35	20	25	1	736	83.7	7.44
A0A0A0MRM9	High	Nucleolar and coiled-body phosphoprotein 1 (Fragment) OS=Homo sapiens OX=9606 GN=NOLC1 PE=1 SV=1	29	19	37	17	708	74.6	9.47
P68431	High	Histone H3.1 OS=Homo sapiens OX=9606 GN=H3C1 PE=1 SV=2	68	12	72	2	136	15.4	11.12
E7EMK3	High	Flotillin OS=Homo sapiens OX=9606 GN=FLOT2 PE=1 SV=1	48	21	35	21	483	53.1	5.24
O60488	High	Long-chain-fatty-acid--CoA ligase 4 OS=Homo sapiens OX=9606 GN=ACSL4 PE=1 SV=2	34	16	32	13	711	79.1	8.38
Q14008	High	Cytoskeleton-associated protein 5 OS=Homo sapiens OX=9606 GN=CKAP5 PE=1 SV=3	22	31	35	31	2032	225.4	7.8
O00148	High	ATP-dependent RNA helicase DDX39A OS=Homo sapiens OX=9606 GN=DDX39A PE=1 SV=2	54	19	35	7	427	49.1	5.68
O60568	High	Multifunctional procollagen lysine hydroxylase and glycosyltransferase LH3 OS=Homo sapiens OX=9606 GN=PLOD3 PE=1 SV=1	35	23	36	23	738	84.7	6.05
P55209	High	Nucleosome assembly protein 1-like 1 OS=Homo sapiens OX=9606 GN=NAP1L1 PE=1 SV=1	41	11	34	10	391	45.3	4.46
P43686	High	26S proteasome regulatory subunit 6B OS=Homo sapiens OX=9606 GN=PSMC4 PE=1 SV=2	50	15	35	15	418	47.3	5.21
P46060	High	Ran GTPase-activating protein 1 OS=Homo sapiens OX=9606 GN=RANGAP1 PE=1 SV=1	51	21	34	21	587	63.5	4.68
Q14683	High	Structural maintenance of chromosomes protein 1A OS=Homo sapiens OX=9606 GN=SMC1A PE=1 SV=2	27	29	36	29	1233	143.1	7.64
Q6ZN40	High	Tropomyosin 1 (Alpha), isoform CRA_f OS=Homo sapiens OX=9606 GN=TPM1 PE=1 SV=1	44	18	51	1	326	37.4	4.72
P55265	High	Double-stranded RNA-specific adenosine deaminase OS=Homo sapiens OX=9606 GN=ADAR PE=1 SV=4	27	25	32	25	1226	136	8.65
A0A0C4DG89	High	Probable ATP-dependent RNA helicase DDX46 OS=Homo sapiens OX=9606 GN=DDX46 PE=1 SV=1	31	25	32	1	1032	117.4	9.29
P31947	High	14-3-3 protein sigma OS=Homo sapiens OX=9606 GN=SFN PE=1 SV=1	71	13	49	9	248	27.8	4.74
O75131	High	Copine-3 OS=Homo sapiens OX=9606 GN=CPNE3 PE=1 SV=1	44	19	33	18	537	60.1	5.85
P61106	High	Ras-related protein Rab-14 OS=Homo sapiens OX=9606 GN=RAB14 PE=1 SV=4	81	13	35	12	215	23.9	6.21
P25786	High	Proteasome subunit alpha type-1 OS=Homo sapiens OX=9606 GN=PSMA1 PE=1 SV=1	82	17	32	17	263	29.5	6.61
P28331	High	NADH-ubiquinone oxidoreductase 75 kDa subunit, mitochondrial OS=Homo sapiens OX=9606 GN=NDUFS1 PE=1 SV=3	45	19	27	19	727	79.4	6.23
A0A1W2PNX8	High	Protein unc-45 homolog A OS=Homo sapiens OX=9606 GN=UNC45A PE=1 SV=1	26	20	28	20	1084	118.3	6.71
P32322	High	Pyrroline-5-carboxylate reductase 1, mitochondrial OS=Homo sapiens OX=9606 GN=PYCR1 PE=1 SV=2	48	10	32	4	319	33.3	7.61
Q93009	High	Ubiquitin carboxyl-terminal hydrolase 7 OS=Homo sapiens OX=9606 GN=USP7 PE=1 SV=2	27	22	28	22	1102	128.2	5.55
P42285	High	Exosome RNA helicase MTR4 OS=Homo sapiens OX=9606 GN=MTREX PE=1 SV=3	32	24	32	24	1042	117.7	6.52
Q9NSD9	High	Phenylalanine--tRNA ligase beta subunit OS=Homo sapiens OX=9606 GN=FARSB PE=1 SV=3	42	20	32	20	589	66.1	6.84
Q15459	High	Splicing factor 3A subunit 1 OS=Homo sapiens OX=9606 GN=SF3A1 PE=1 SV=1	30	19	32	19	793	88.8	5.22
O94874	High	E3 UFM1-protein ligase 1 OS=Homo sapiens OX=9606 GN=UFL1 PE=1 SV=2	34	20	27	20	794	89.5	6.79
A0A2R8YHD2	High	Tropomyosin alpha-4 chain (Fragment) OS=Homo sapiens OX=9606 GN=TPM4 PE=1 SV=2	57	19	48	5	248	28.7	4.65
Q8TDD1	High	ATP-dependent RNA helicase DDX54 OS=Homo sapiens OX=9606 GN=DDX54 PE=1 SV=2	39	22	30	22	881	98.5	10.02
Q9P258	High	Protein RCC2 OS=Homo sapiens OX=9606 GN=RCC2 PE=1 SV=2	46	18	36	18	522	56	8.78
P22087	High	rRNA 2'-O-methyltransferase fibrillarin OS=Homo sapiens OX=9606 GN=FBL PE=1 SV=2	64	15	38	15	321	33.8	10.18
Q15424	High	Scaffold attachment factor B1 OS=Homo sapiens OX=9606 GN=SAFB PE=1 SV=4	29	22	38	14	915	102.6	5.47
Q96AE4	High	Far upstream element-binding protein 1 OS=Homo sapiens OX=9606 GN=FUBP1 PE=1 SV=3	37	20	36	11	644	67.5	7.61
D6REX3	High	Protein transport protein Sec31A OS=Homo sapiens OX=9606 GN=SEC31A PE=1 SV=1	24	17	24	17	1251	136.1	6.98
Q01105	High	Protein SET OS=Homo sapiens OX=9606 GN=SET PE=1 SV=3	41	8	28	8	290	33.5	4.32
Q9H0U4	High	Ras-related protein Rab-1B OS=Homo sapiens OX=9606 GN=RAB1B PE=1 SV=1	75	12	52	4	201	22.2	5.73
Q10567	High	AP-1 complex subunit beta-1 OS=Homo sapiens OX=9606 GN=AP1B1 PE=1 SV=2	28	19	29	8	949	104.6	5.06
Q9NW13	High	RNA-binding protein 28 OS=Homo sapiens OX=9606 GN=RBM28 PE=1 SV=3	33	22	29	22	759	85.7	9.22
Q7L014	High	Probable ATP-dependent RNA helicase DDX46 OS=Homo sapiens OX=9606 GN=DDX46 PE=1 SV=2	31	25	32	1	1031	117.3	9.29
P04259	High	Keratin, type II cytoskeletal 6B OS=Homo sapiens OX=9606 GN=KRT6B PE=1 SV=5	29	19	46	4	564	60	8
P18754	High	Regulator of chromosome condensation OS=Homo sapiens OX=9606 GN=RCC1 PE=1 SV=1	51	13	39	12	421	44.9	7.52
Q14257	High	Reticulocalbin-2 OS=Homo sapiens OX=9606 GN=RCN2 PE=1 SV=1	55	14	39	13	317	36.9	4.4
P36542	High	ATP synthase subunit gamma, mitochondrial OS=Homo sapiens OX=9606 GN=ATP5F1C PE=1 SV=1	53	16	35	15	298	33	9.22
P49790	High	Nuclear pore complex protein Nup153 OS=Homo sapiens OX=9606 GN=NUP153 PE=1 SV=2	26	28	31	28	1475	153.8	8.73
P30153	High	Serine/threonine-protein phosphatase 2A 65 kDa regulatory subunit A alpha isoform OS=Homo sapiens OX=9606 GN=PPP2R1A PE=1 SV=4	42	21	34	21	589	65.3	5.11
P23526	High	Adenosylhomocysteinase OS=Homo sapiens OX=9606 GN=AHCY PE=1 SV=4	45	17	42	16	432	47.7	6.34
V9GYM8	High	Rho guanine nucleotide exchange factor 2 OS=Homo sapiens OX=9606 GN=ARHGEF2 PE=1 SV=1	29	19	30	19	1031	116	7.37
P09104	High	Gamma-enolase OS=Homo sapiens OX=9606 GN=ENO2 PE=1 SV=3	34	10	71	5	434	47.2	5.03
P27635	High	60S ribosomal protein L10 OS=Homo sapiens OX=9606 GN=RPL10 PE=1 SV=4	52	11	51	3	214	24.6	10.08
P45974	High	Ubiquitin carboxyl-terminal hydrolase 5 OS=Homo sapiens OX=9606 GN=USP5 PE=1 SV=2	37	19	30	18	858	95.7	5.03
P40261	High	Nicotinamide N-methyltransferase OS=Homo sapiens OX=9606 GN=NNMT PE=1 SV=1	62	11	30	11	264	29.6	5.74
Q96CS3	High	FAS-associated factor 2 OS=Homo sapiens OX=9606 GN=FAF2 PE=1 SV=2	54	14	32	14	445	52.6	5.62
B1AK88	High	F-actin-capping protein subunit beta OS=Homo sapiens OX=9606 GN=CAPZB PE=1 SV=1	54	15	32	15	301	33.8	6.43
G3XAI2	High	Laminin subunit beta-1 OS=Homo sapiens OX=9606 GN=LAMB1 PE=1 SV=1	20	24	30	24	1810	200.3	4.96
D3DQV9	High	Eukaryotic translation initiation factor 4 gamma 2 (Fragment) OS=Homo sapiens OX=9606 GN=EIF4G2 PE=1 SV=1	28	21	30	21	907	102.3	7.14
P23381	High	Tryptophan--tRNA ligase, cytoplasmic OS=Homo sapiens OX=9606 GN=WARS PE=1 SV=2	43	16	35	16	471	53.1	6.23
O00231	High	26S proteasome non-ATPase regulatory subunit 11 OS=Homo sapiens OX=9606 GN=PSMD11 PE=1 SV=3	55	19	31	19	422	47.4	6.48
P49753	High	Acyl-coenzyme A thioesterase 2, mitochondrial OS=Homo sapiens OX=9606 GN=ACOT2 PE=1 SV=6	51	16	28	15	483	53.2	8.47
P38159	High	RNA-binding motif protein, X chromosome OS=Homo sapiens OX=9606 GN=RBMX PE=1 SV=3	36	15	54	15	391	42.3	10.05
O00232	High	26S proteasome non-ATPase regulatory subunit 12 OS=Homo sapiens OX=9606 GN=PSMD12 PE=1 SV=3	49	17	30	17	456	52.9	7.65
P35658	High	Nuclear pore complex protein Nup214 OS=Homo sapiens OX=9606 GN=NUP214 PE=1 SV=2	17	22	30	21	2090	213.5	7.47
P00491	High	Purine nucleoside phosphorylase OS=Homo sapiens OX=9606 GN=PNP PE=1 SV=2	69	14	28	14	289	32.1	6.95
P36873	High	Serine/threonine-protein phosphatase PP1-gamma catalytic subunit OS=Homo sapiens OX=9606 GN=PPP1CC PE=1 SV=1	60	13	35	3	323	37	6.54
H3BNC9	High	Uncharacterized protein OS=Homo sapiens OX=9606 PE=3 SV=2	13	8	30	8	584	64.5	8.78
O43242	High	26S proteasome non-ATPase regulatory subunit 3 OS=Homo sapiens OX=9606 GN=PSMD3 PE=1 SV=2	40	17	29	17	534	60.9	8.44
Q9BVP2	High	Guanine nucleotide-binding protein-like 3 OS=Homo sapiens OX=9606 GN=GNL3 PE=1 SV=2	37	17	33	17	549	62	9.16
Q1KMD3	High	Heterogeneous nuclear ribonucleoprotein U-like protein 2 OS=Homo sapiens OX=9606 GN=HNRNPUL2 PE=1 SV=1	31	16	32	16	747	85.1	4.91
P62191	High	26S proteasome regulatory subunit 4 OS=Homo sapiens OX=9606 GN=PSMC1 PE=1 SV=1	50	16	33	15	440	49.2	6.21
P54652	High	Heat shock-related 70 kDa protein 2 OS=Homo sapiens OX=9606 GN=HSPA2 PE=1 SV=1	21	13	66	1	639	70	5.74
C9JFV4	High	Proline-, glutamic acid- and leucine-rich protein 1 OS=Homo sapiens OX=9606 GN=PELP1 PE=1 SV=2	33	18	32	18	1180	124.9	4.41
Q9NP58	High	ATP-binding cassette sub-family B member 6, mitochondrial OS=Homo sapiens OX=9606 GN=ABCB6 PE=1 SV=1	27	14	25	14	842	93.8	8.48
Q9Y277	High	Voltage-dependent anion-selective channel protein 3 OS=Homo sapiens OX=9606 GN=VDAC3 PE=1 SV=1	57	12	43	11	283	30.6	8.66
P51991	High	Heterogeneous nuclear ribonucleoprotein A3 OS=Homo sapiens OX=9606 GN=HNRNPA3 PE=1 SV=2	32	13	44	11	378	39.6	9.01
Q9H9B4	High	Sideroflexin-1 OS=Homo sapiens OX=9606 GN=SFXN1 PE=1 SV=4	55	12	36	10	322	35.6	9.07
Q27J81	High	Inverted formin-2 OS=Homo sapiens OX=9606 GN=INF2 PE=1 SV=2	30	22	27	22	1249	135.5	5.38
Q92896	High	Golgi apparatus protein 1 OS=Homo sapiens OX=9606 GN=GLG1 PE=1 SV=2	29	22	30	22	1179	134.5	6.9
Q9UMS4	High	Pre-mRNA-processing factor 19 OS=Homo sapiens OX=9606 GN=PRPF19 PE=1 SV=1	49	15	31	15	504	55.1	6.61
Q9Y2Z4	High	Tyrosine--tRNA ligase, mitochondrial OS=Homo sapiens OX=9606 GN=YARS2 PE=1 SV=2	52	16	26	16	477	53.2	8.98
Q14203	High	Dynactin subunit 1 OS=Homo sapiens OX=9606 GN=DCTN1 PE=1 SV=3	29	23	26	23	1278	141.6	5.81
P62937	High	Peptidyl-prolyl cis-trans isomerase A OS=Homo sapiens OX=9606 GN=PPIA PE=1 SV=2	76	13	59	13	165	18	7.81
Q6NZI2	High	Caveolae-associated protein 1 OS=Homo sapiens OX=9606 GN=CAVIN1 PE=1 SV=1	36	13	37	13	390	43.5	5.6
Q10713	High	Mitochondrial-processing peptidase subunit alpha OS=Homo sapiens OX=9606 GN=PMPCA PE=1 SV=2	41	17	27	17	525	58.2	6.92
G8JLA2	High	Myosin light polypeptide 6 OS=Homo sapiens OX=9606 GN=MYL6 PE=1 SV=1	70	9	39	7	152	17.1	4.55
P08574	High	Cytochrome c1, heme protein, mitochondrial OS=Homo sapiens OX=9606 GN=CYC1 PE=1 SV=3	49	9	40	9	325	35.4	9
J3KN66	High	Torsin-1A-interacting protein 1 OS=Homo sapiens OX=9606 GN=TOR1AIP1 PE=1 SV=1	41	17	27	1	599	67.8	7.9
O75947	High	ATP synthase subunit d, mitochondrial OS=Homo sapiens OX=9606 GN=ATP5PD PE=1 SV=3	77	12	47	12	161	18.5	5.3
P06737	High	Glycogen phosphorylase, liver form OS=Homo sapiens OX=9606 GN=PYGL PE=1 SV=4	32	21	30	17	847	97.1	7.17
A0A2R8Y891	High	ATP-dependent 6-phosphofructokinase OS=Homo sapiens OX=9606 GN=PFKM PE=1 SV=1	33	21	25	17	883	96.8	8.12
Q5JTV8	High	Torsin-1A-interacting protein 1 OS=Homo sapiens OX=9606 GN=TOR1AIP1 PE=1 SV=2	42	17	28	1	583	66.2	8.18
Q9BPX3	High	Condensin complex subunit 3 OS=Homo sapiens OX=9606 GN=NCAPG PE=1 SV=1	32	24	29	24	1015	114.3	5.59
P21980	High	Protein-glutamine gamma-glutamyltransferase 2 OS=Homo sapiens OX=9606 GN=TGM2 PE=1 SV=2	45	18	31	18	687	77.3	5.22
P67809	High	Y-box-binding protein 1 OS=Homo sapiens OX=9606 GN=YBX1 PE=1 SV=3	38	9	36	6	324	35.9	9.88
Q9Y3I0	High	tRNA-splicing ligase RtcB homolog OS=Homo sapiens OX=9606 GN=RTCB PE=1 SV=1	48	17	26	17	505	55.2	7.23
P52209	High	6-phosphogluconate dehydrogenase, decarboxylating OS=Homo sapiens OX=9606 GN=PGD PE=1 SV=3	44	16	29	16	483	53.1	7.23
P62820	High	Ras-related protein Rab-1A OS=Homo sapiens OX=9606 GN=RAB1A PE=1 SV=3	72	12	52	4	205	22.7	6.21
P62495	High	Eukaryotic peptide chain release factor subunit 1 OS=Homo sapiens OX=9606 GN=ETF1 PE=1 SV=3	54	17	30	17	437	49	5.71
P15531	High	Nucleoside diphosphate kinase A OS=Homo sapiens OX=9606 GN=NME1 PE=1 SV=1	70	10	49	1	152	17.1	6.19
P00533	High	Epidermal growth factor receptor OS=Homo sapiens OX=9606 GN=EGFR PE=1 SV=2	24	18	26	18	1210	134.2	6.68
P32119	High	Peroxiredoxin-2 OS=Homo sapiens OX=9606 GN=PRDX2 PE=1 SV=5	53	10	36	9	198	21.9	5.97
Q9Y6C9	High	Mitochondrial carrier homolog 2 OS=Homo sapiens OX=9606 GN=MTCH2 PE=1 SV=1	49	11	34	11	303	33.3	7.97
Q14137	High	Ribosome biogenesis protein BOP1 OS=Homo sapiens OX=9606 GN=BOP1 PE=1 SV=2	39	16	25	16	746	83.6	6.19
Q12788	High	Transducin beta-like protein 3 OS=Homo sapiens OX=9606 GN=TBL3 PE=1 SV=2	31	15	23	15	808	89	6.9
P48637	High	Glutathione synthetase OS=Homo sapiens OX=9606 GN=GSS PE=1 SV=1	50	18	27	18	474	52.4	5.92
H0Y5F5	High	Polyadenylate-binding protein (Fragment) OS=Homo sapiens OX=9606 GN=PABPC4 PE=1 SV=1	35	18	35	1	550	60.2	9.41
P17174	High	Aspartate aminotransferase, cytoplasmic OS=Homo sapiens OX=9606 GN=GOT1 PE=1 SV=3	51	15	31	15	413	46.2	7.01
Q5JRX3	High	Presequence protease, mitochondrial OS=Homo sapiens OX=9606 GN=PITRM1 PE=1 SV=3	29	21	28	21	1037	117.3	6.92
O94906	High	Pre-mRNA-processing factor 6 OS=Homo sapiens OX=9606 GN=PRPF6 PE=1 SV=1	35	23	29	23	941	106.9	8.25
Q14914	High	Prostaglandin reductase 1 OS=Homo sapiens OX=9606 GN=PTGR1 PE=1 SV=2	62	17	29	17	329	35.8	8.29
P07099	High	Epoxide hydrolase 1 OS=Homo sapiens OX=9606 GN=EPHX1 PE=1 SV=1	49	16	30	16	455	52.9	7.25
O14617	High	AP-3 complex subunit delta-1 OS=Homo sapiens OX=9606 GN=AP3D1 PE=1 SV=1	25	20	25	20	1153	130.1	8.48
Q16401	High	26S proteasome non-ATPase regulatory subunit 5 OS=Homo sapiens OX=9606 GN=PSMD5 PE=1 SV=3	47	15	25	15	504	56.2	5.48
Q9BUJ2	High	Heterogeneous nuclear ribonucleoprotein U-like protein 1 OS=Homo sapiens OX=9606 GN=HNRNPUL1 PE=1 SV=2	26	16	26	16	856	95.7	6.92
H7BYY1	High	Tropomyosin 1 (Alpha), isoform CRA_m OS=Homo sapiens OX=9606 GN=TPM1 PE=1 SV=1	54	15	49	6	248	28.7	4.82
A0A2R8Y521	High	Chromodomain-helicase-DNA-binding protein 4 OS=Homo sapiens OX=9606 GN=CHD4 PE=1 SV=1	21	24	27	18	1920	218.4	6.05
Q9NVP1	High	ATP-dependent RNA helicase DDX18 OS=Homo sapiens OX=9606 GN=DDX18 PE=1 SV=2	39	20	30	20	670	75.4	9.5
P09110	High	3-ketoacyl-CoA thiolase, peroxisomal OS=Homo sapiens OX=9606 GN=ACAA1 PE=1 SV=2	61	16	26	16	424	44.3	8.44
Q9Y4W2	High	Ribosomal biogenesis protein LAS1L OS=Homo sapiens OX=9606 GN=LAS1L PE=1 SV=2	37	18	29	18	734	83	4.73
B0QY89	High	Eukaryotic translation initiation factor 3 subunit L OS=Homo sapiens OX=9606 GN=EIF3L PE=1 SV=1	38	19	32	19	607	70.9	6.65
C9JIZ6	High	Prosaposin OS=Homo sapiens OX=9606 GN=PSAP PE=1 SV=2	36	17	46	17	527	58.4	5.17
P39656	High	Dolichyl-diphosphooligosaccharide--protein glycosyltransferase 48 kDa subunit OS=Homo sapiens OX=9606 GN=DDOST PE=1 SV=4	44	14	32	14	456	50.8	6.55
P04899	High	Guanine nucleotide-binding protein G(i) subunit alpha-2 OS=Homo sapiens OX=9606 GN=GNAI2 PE=1 SV=3	56	15	28	8	355	40.4	5.54
A0A087X2I1	High	26S proteasome regulatory subunit 10B OS=Homo sapiens OX=9606 GN=PSMC6 PE=1 SV=1	48	14	29	14	403	45.8	7.78
O14974	High	Protein phosphatase 1 regulatory subunit 12A OS=Homo sapiens OX=9606 GN=PPP1R12A PE=1 SV=1	24	17	23	17	1030	115.2	5.4
P62140	High	Serine/threonine-protein phosphatase PP1-beta catalytic subunit OS=Homo sapiens OX=9606 GN=PPP1CB PE=1 SV=3	56	12	32	5	327	37.2	6.19
P02751	High	Fibronectin OS=Homo sapiens OX=9606 GN=FN1 PE=1 SV=5	11	18	26	18	2477	272.2	5.5
Q96I99	High	Succinate--CoA ligase [GDP-forming] subunit beta, mitochondrial OS=Homo sapiens OX=9606 GN=SUCLG2 PE=1 SV=2	50	17	28	17	432	46.5	6.39
A0A0S2Z4G6	High	Tropomyosin 1 (Alpha), isoform CRA_o (Fragment) OS=Homo sapiens OX=9606 GN=TPM1 PE=1 SV=1	40	16	48	1	284	32.7	4.74
E9PGZ1	High	Caldesmon OS=Homo sapiens OX=9606 GN=CALD1 PE=1 SV=1	37	17	29	17	536	61.7	6.11
Q8TEQ6	High	Gem-associated protein 5 OS=Homo sapiens OX=9606 GN=GEMIN5 PE=1 SV=3	21	21	28	21	1508	168.5	6.62
Q14692	High	Ribosome biogenesis protein BMS1 homolog OS=Homo sapiens OX=9606 GN=BMS1 PE=1 SV=1	21	17	25	17	1282	145.7	6.44
O00151	High	PDZ and LIM domain protein 1 OS=Homo sapiens OX=9606 GN=PDLIM1 PE=1 SV=4	71	14	29	14	329	36	7.02
Q16666	High	Gamma-interferon-inducible protein 16 OS=Homo sapiens OX=9606 GN=IFI16 PE=1 SV=3	37	23	33	23	785	88.2	9.28
P28066	High	Proteasome subunit alpha type-5 OS=Homo sapiens OX=9606 GN=PSMA5 PE=1 SV=3	57	11	31	11	241	26.4	4.79
Q9UPN3	High	Microtubule-actin cross-linking factor 1, isoforms 1/2/3/5 OS=Homo sapiens OX=9606 GN=MACF1 PE=1 SV=4	5	25	30	24	7388	837.8	5.39
P51858	High	Hepatoma-derived growth factor OS=Homo sapiens OX=9606 GN=HDGF PE=1 SV=1	60	14	39	13	240	26.8	4.73
J3KQE5	High	GTP-binding nuclear protein Ran (Fragment) OS=Homo sapiens OX=9606 GN=RAN PE=1 SV=1	45	10	31	10	234	26.8	9.58
Q8IXI1	High	Mitochondrial Rho GTPase 2 OS=Homo sapiens OX=9606 GN=RHOT2 PE=1 SV=2	44	15	25	13	618	68.1	5.86
Q15019	High	Septin-2 OS=Homo sapiens OX=9606 GN=SEPTIN2 PE=1 SV=1	61	15	30	14	361	41.5	6.6
Q9H4G0	High	Band 4.1-like protein 1 OS=Homo sapiens OX=9606 GN=EPB41L1 PE=1 SV=2	32	21	31	13	881	98.4	5.62
P20042	High	Eukaryotic translation initiation factor 2 subunit 2 OS=Homo sapiens OX=9606 GN=EIF2S2 PE=1 SV=2	50	16	32	16	333	38.4	5.8
P62987	High	Ubiquitin-60S ribosomal protein L40 OS=Homo sapiens OX=9606 GN=UBA52 PE=1 SV=2	65	12	129	1	128	14.7	9.83
P21964	High	Catechol O-methyltransferase OS=Homo sapiens OX=9606 GN=COMT PE=1 SV=2	58	12	29	12	271	30	5.47
Q92538	High	Golgi-specific brefeldin A-resistance guanine nucleotide exchange factor 1 OS=Homo sapiens OX=9606 GN=GBF1 PE=1 SV=2	19	24	26	24	1859	206.3	5.73
O60832	High	H/ACA ribonucleoprotein complex subunit DKC1 OS=Homo sapiens OX=9606 GN=DKC1 PE=1 SV=3	48	19	33	19	514	57.6	9.42
Q13045	High	Protein flightless-1 homolog OS=Homo sapiens OX=9606 GN=FLII PE=1 SV=2	24	19	24	12	1269	144.7	6.05
P52292	High	Importin subunit alpha-1 OS=Homo sapiens OX=9606 GN=KPNA2 PE=1 SV=1	51	17	27	17	529	57.8	5.4
Q96PK6	High	RNA-binding protein 14 OS=Homo sapiens OX=9606 GN=RBM14 PE=1 SV=2	36	18	33	18	669	69.4	9.67
Q96AG4	High	Leucine-rich repeat-containing protein 59 OS=Homo sapiens OX=9606 GN=LRRC59 PE=1 SV=1	51	14	34	14	307	34.9	9.57
P46939	High	Utrophin OS=Homo sapiens OX=9606 GN=UTRN PE=1 SV=2	9	20	23	19	3433	394.2	5.33
O60684	High	Importin subunit alpha-7 OS=Homo sapiens OX=9606 GN=KPNA6 PE=1 SV=1	39	13	24	7	536	60	4.98
A0A3B3ISF9	High	Endothelin-converting enzyme 1 OS=Homo sapiens OX=9606 GN=ECE1 PE=1 SV=1	29	20	28	20	842	94.4	5.82
P15170	High	Eukaryotic peptide chain release factor GTP-binding subunit ERF3A OS=Homo sapiens OX=9606 GN=GSPT1 PE=1 SV=1	51	21	34	21	499	55.7	5.62
Q92878	High	DNA repair protein RAD50 OS=Homo sapiens OX=9606 GN=RAD50 PE=1 SV=1	24	23	28	23	1312	153.8	6.89
P61604	High	10 kDa heat shock protein, mitochondrial OS=Homo sapiens OX=9606 GN=HSPE1 PE=1 SV=2	81	10	64	6	102	10.9	8.92
P48449	High	Lanosterol synthase OS=Homo sapiens OX=9606 GN=LSS PE=1 SV=1	34	21	30	21	732	83.3	6.61
O60701	High	UDP-glucose 6-dehydrogenase OS=Homo sapiens OX=9606 GN=UGDH PE=1 SV=1	51	16	25	16	494	55	7.12
Q03701	High	CCAAT/enhancer-binding protein zeta OS=Homo sapiens OX=9606 GN=CEBPZ PE=1 SV=3	26	21	26	21	1054	120.9	5.94
Q04917	High	14-3-3 protein eta OS=Homo sapiens OX=9606 GN=YWHAH PE=1 SV=4	62	14	49	10	246	28.2	4.84
Q12965	High	Unconventional myosin-Ie OS=Homo sapiens OX=9606 GN=MYO1E PE=1 SV=2	29	23	28	22	1108	127	8.92
Q9BXJ9	High	N-alpha-acetyltransferase 15, NatA auxiliary subunit OS=Homo sapiens OX=9606 GN=NAA15 PE=1 SV=1	28	21	29	21	866	101.2	7.42
Q9HDC9	High	Adipocyte plasma membrane-associated protein OS=Homo sapiens OX=9606 GN=APMAP PE=1 SV=2	45	15	29	15	416	46.5	6.16
P18085	High	ADP-ribosylation factor 4 OS=Homo sapiens OX=9606 GN=ARF4 PE=1 SV=3	80	11	36	7	180	20.5	7.14
A7XZE4	High	Beta tropomyosin isoform OS=Homo sapiens OX=9606 GN=TPM2 PE=1 SV=1	42	16	43	1	284	33	4.69
Q8N163	High	Cell cycle and apoptosis regulator protein 2 OS=Homo sapiens OX=9606 GN=CCAR2 PE=1 SV=2	30	18	24	18	923	102.8	5.22
A0A0G2JH50	High	HLA class I histocompatibility antigen, C alpha chain OS=Homo sapiens OX=9606 GN=HLA-C PE=1 SV=1	38	9	34	2	372	41.5	7.47
E9PAU2	High	Ribonucleoprotein PTB-binding 1 OS=Homo sapiens OX=9606 GN=RAVER1 PE=1 SV=1	44	17	28	17	756	79.5	8.92
Q14498	High	RNA-binding protein 39 OS=Homo sapiens OX=9606 GN=RBM39 PE=1 SV=2	38	16	29	16	530	59.3	10.1
O75746	High	Calcium-binding mitochondrial carrier protein Aralar1 OS=Homo sapiens OX=9606 GN=SLC25A12 PE=1 SV=2	32	16	29	9	678	74.7	8.38
P51648	High	Aldehyde dehydrogenase family 3 member A2 OS=Homo sapiens OX=9606 GN=ALDH3A2 PE=1 SV=1	33	13	31	11	485	54.8	7.88
P26368	High	Splicing factor U2AF 65 kDa subunit OS=Homo sapiens OX=9606 GN=U2AF2 PE=1 SV=4	39	10	30	10	475	53.5	9.09
Q96AC1	High	Fermitin family homolog 2 OS=Homo sapiens OX=9606 GN=FERMT2 PE=1 SV=1	35	17	27	17	680	77.8	6.7
J3QRS3	High	Myosin regulatory light chain 12A OS=Homo sapiens OX=9606 GN=MYL12A PE=1 SV=1	60	10	48	3	177	20.4	4.75
Q8TCS8	High	Polyribonucleotide nucleotidyltransferase 1, mitochondrial OS=Homo sapiens OX=9606 GN=PNPT1 PE=1 SV=2	37	22	30	22	783	85.9	7.77
Q9UMX0	High	Ubiquilin-1 OS=Homo sapiens OX=9606 GN=UBQLN1 PE=1 SV=2	35	11	18	5	589	62.5	5.11
P09972	High	Fructose-bisphosphate aldolase C OS=Homo sapiens OX=9606 GN=ALDOC PE=1 SV=2	60	16	46	11	364	39.4	6.87
P61026	High	Ras-related protein Rab-10 OS=Homo sapiens OX=9606 GN=RAB10 PE=1 SV=1	69	15	39	12	200	22.5	8.38
Q15691	High	Microtubule-associated protein RP/EB family member 1 OS=Homo sapiens OX=9606 GN=MAPRE1 PE=1 SV=3	67	10	27	10	268	30	5.14
P04040	High	Catalase OS=Homo sapiens OX=9606 GN=CAT PE=1 SV=3	38	15	25	15	527	59.7	7.39
P33316	High	Deoxyuridine 5'-triphosphate nucleotidohydrolase, mitochondrial OS=Homo sapiens OX=9606 GN=DUT PE=1 SV=4	54	10	29	10	252	26.5	9.36
P62136	High	Serine/threonine-protein phosphatase PP1-alpha catalytic subunit OS=Homo sapiens OX=9606 GN=PPP1CA PE=1 SV=1	49	12	33	2	330	37.5	6.33
J3KTL2	High	Serine/arginine-rich-splicing factor 1 OS=Homo sapiens OX=9606 GN=SRSF1 PE=1 SV=1	46	14	53	14	253	28.3	10.08
E7EX17	High	Eukaryotic translation initiation factor 4B OS=Homo sapiens OX=9606 GN=EIF4B PE=1 SV=1	31	17	37	17	616	69.7	5.67
P08648	High	Integrin alpha-5 OS=Homo sapiens OX=9606 GN=ITGA5 PE=1 SV=2	27	18	29	18	1049	114.5	5.77
O60716	High	Catenin delta-1 OS=Homo sapiens OX=9606 GN=CTNND1 PE=1 SV=1	30	17	25	17	968	108.1	6.23
P51649	High	Succinate-semialdehyde dehydrogenase, mitochondrial OS=Homo sapiens OX=9606 GN=ALDH5A1 PE=1 SV=2	42	13	21	13	535	57.2	8.28
P55795	High	Heterogeneous nuclear ribonucleoprotein H2 OS=Homo sapiens OX=9606 GN=HNRNPH2 PE=1 SV=1	39	12	34	6	449	49.2	6.3
Q32P28	High	Prolyl 3-hydroxylase 1 OS=Homo sapiens OX=9606 GN=P3H1 PE=1 SV=2	32	17	26	17	736	83.3	5.14
O00629	High	Importin subunit alpha-3 OS=Homo sapiens OX=9606 GN=KPNA4 PE=1 SV=1	45	13	25	10	521	57.9	4.96
Q9BXP5	High	Serrate RNA effector molecule homolog OS=Homo sapiens OX=9606 GN=SRRT PE=1 SV=1	28	19	28	19	876	100.6	5.96
P20339	High	Ras-related protein Rab-5A OS=Homo sapiens OX=9606 GN=RAB5A PE=1 SV=2	67	9	26	6	215	23.6	8.15
P27695	High	DNA-(apurinic or apyrimidinic site) lyase OS=Homo sapiens OX=9606 GN=APEX1 PE=1 SV=2	55	13	27	13	318	35.5	8.12
O43592	High	Exportin-T OS=Homo sapiens OX=9606 GN=XPOT PE=1 SV=2	25	16	21	16	962	109.9	5.39
Q10471	High	Polypeptide N-acetylgalactosaminyltransferase 2 OS=Homo sapiens OX=9606 GN=GALNT2 PE=1 SV=1	38	17	29	17	571	64.7	8.35
Q8WTT2	High	Nucleolar complex protein 3 homolog OS=Homo sapiens OX=9606 GN=NOC3L PE=1 SV=1	32	17	27	17	800	92.5	9.17
O43795	High	Unconventional myosin-Ib OS=Homo sapiens OX=9606 GN=MYO1B PE=1 SV=3	22	18	29	17	1136	131.9	9.38
Q9UBS4	High	DnaJ homolog subfamily B member 11 OS=Homo sapiens OX=9606 GN=DNAJB11 PE=1 SV=1	37	12	32	12	358	40.5	6.18
P16401	High	Histone H1.5 OS=Homo sapiens OX=9606 GN=H1-5 PE=1 SV=3	42	14	57	8	226	22.6	10.92
P61204	High	ADP-ribosylation factor 3 OS=Homo sapiens OX=9606 GN=ARF3 PE=1 SV=2	73	11	37	1	181	20.6	7.43
P53007	High	Tricarboxylate transport protein, mitochondrial OS=Homo sapiens OX=9606 GN=SLC25A1 PE=1 SV=2	47	11	20	11	311	34	9.89
P22234	High	Multifunctional protein ADE2 OS=Homo sapiens OX=9606 GN=PAICS PE=1 SV=3	51	16	27	16	425	47	7.23
Q16643	High	Drebrin OS=Homo sapiens OX=9606 GN=DBN1 PE=1 SV=4	42	15	26	15	649	71.4	4.45
P27694	High	Replication protein A 70 kDa DNA-binding subunit OS=Homo sapiens OX=9606 GN=RPA1 PE=1 SV=2	39	18	24	18	616	68.1	7.21
P28288	High	ATP-binding cassette sub-family D member 3 OS=Homo sapiens OX=9606 GN=ABCD3 PE=1 SV=1	32	17	26	17	659	75.4	9.36
P09211	High	Glutathione S-transferase P OS=Homo sapiens OX=9606 GN=GSTP1 PE=1 SV=2	59	9	45	9	210	23.3	5.64
O75027	High	ATP-binding cassette sub-family B member 7, mitochondrial OS=Homo sapiens OX=9606 GN=ABCB7 PE=1 SV=2	30	14	22	14	752	82.6	9.33
P12277	High	Creatine kinase B-type OS=Homo sapiens OX=9606 GN=CKB PE=1 SV=1	49	11	21	11	381	42.6	5.59
P46013	High	Proliferation marker protein Ki-67 OS=Homo sapiens OX=9606 GN=MKI67 PE=1 SV=2	15	28	32	28	3256	358.5	9.45
Q9NYL9	High	Tropomodulin-3 OS=Homo sapiens OX=9606 GN=TMOD3 PE=1 SV=1	57	16	32	16	352	39.6	5.19
Q6ZVX7	High	F-box only protein 50 OS=Homo sapiens OX=9606 GN=NCCRP1 PE=1 SV=1	51	10	25	10	275	30.8	6.62
A0A0A6YYL6	High	Protein RPL17-C18orf32 OS=Homo sapiens OX=9606 GN=RPL17-C18orf32 PE=3 SV=1	41	9	47	8	228	26.4	10.1
P48163	High	NADP-dependent malic enzyme OS=Homo sapiens OX=9606 GN=ME1 PE=1 SV=1	39	14	22	14	572	64.1	6.13
A0A1P0AYU5	High	Sidoreflexin OS=Homo sapiens OX=9606 GN=SFXN3 PE=1 SV=1	65	16	25	14	325	36	9.09
P60981	High	Destrin OS=Homo sapiens OX=9606 GN=DSTN PE=1 SV=3	61	12	24	11	165	18.5	7.85
Q9Y305	High	Acyl-coenzyme A thioesterase 9, mitochondrial OS=Homo sapiens OX=9606 GN=ACOT9 PE=1 SV=2	44	15	27	15	439	49.9	8.6
Q9H307	High	Pinin OS=Homo sapiens OX=9606 GN=PNN PE=1 SV=5	25	17	29	17	717	81.6	7.14
Q8IY17	High	Neuropathy target esterase OS=Homo sapiens OX=9606 GN=PNPLA6 PE=1 SV=3	20	15	19	15	1375	150.9	7.74
P48735	High	Isocitrate dehydrogenase [NADP], mitochondrial OS=Homo sapiens OX=9606 GN=IDH2 PE=1 SV=2	44	17	28	17	452	50.9	8.69
Q8TDN6	High	Ribosome biogenesis protein BRX1 homolog OS=Homo sapiens OX=9606 GN=BRIX1 PE=1 SV=2	45	15	30	15	353	41.4	9.92
P17066	High	Heat shock 70 kDa protein 6 OS=Homo sapiens OX=9606 GN=HSPA6 PE=1 SV=2	19	10	46	1	643	71	6.14
Q8NBJ5	High	Procollagen galactosyltransferase 1 OS=Homo sapiens OX=9606 GN=COLGALT1 PE=1 SV=1	34	18	29	18	622	71.6	7.31
P06396	High	Gelsolin OS=Homo sapiens OX=9606 GN=GSN PE=1 SV=1	27	15	27	15	782	85.6	6.28
Q14684	High	Ribosomal RNA processing protein 1 homolog B OS=Homo sapiens OX=9606 GN=RRP1B PE=1 SV=3	33	17	23	17	758	84.4	9.76
Q8NC51	High	Plasminogen activator inhibitor 1 RNA-binding protein OS=Homo sapiens OX=9606 GN=SERBP1 PE=1 SV=2	37	14	34	14	408	44.9	8.65
Q5SRE5	High	Nucleoporin NUP188 homolog OS=Homo sapiens OX=9606 GN=NUP188 PE=1 SV=1	17	21	25	21	1749	195.9	6.73
P13995	High	Bifunctional methylenetetrahydrofolate dehydrogenase/cyclohydrolase, mitochondrial OS=Homo sapiens OX=9606 GN=MTHFD2 PE=1 SV=2	57	12	26	12	350	37.9	8.73
Q96KP4	High	Cytosolic non-specific dipeptidase OS=Homo sapiens OX=9606 GN=CNDP2 PE=1 SV=2	48	15	24	15	475	52.8	5.97
Q9UIG0	High	Tyrosine-protein kinase BAZ1B OS=Homo sapiens OX=9606 GN=BAZ1B PE=1 SV=2	18	20	25	20	1483	170.8	8.48
P40925	High	Malate dehydrogenase, cytoplasmic OS=Homo sapiens OX=9606 GN=MDH1 PE=1 SV=4	44	16	35	16	334	36.4	7.36
Q96TC7	High	Regulator of microtubule dynamics protein 3 OS=Homo sapiens OX=9606 GN=RMDN3 PE=1 SV=2	50	15	23	15	470	52.1	5.1
A0A140T9T7	High	Antigen peptide transporter 1 OS=Homo sapiens OX=9606 GN=TAP1 PE=1 SV=1	27	12	21	12	808	87.1	8.02
Q6YHK3	High	CD109 antigen OS=Homo sapiens OX=9606 GN=CD109 PE=1 SV=2	20	19	23	19	1445	161.6	5.85
Q12907	High	Vesicular integral-membrane protein VIP36 OS=Homo sapiens OX=9606 GN=LMAN2 PE=1 SV=1	56	14	28	14	356	40.2	6.95
Q15392	High	Delta(24)-sterol reductase OS=Homo sapiens OX=9606 GN=DHCR24 PE=1 SV=2	31	13	27	13	516	60.1	8.16
O14818	High	Proteasome subunit alpha type-7 OS=Homo sapiens OX=9606 GN=PSMA7 PE=1 SV=1	64	13	31	13	248	27.9	8.46
Q12904	High	Aminoacyl tRNA synthase complex-interacting multifunctional protein 1 OS=Homo sapiens OX=9606 GN=AIMP1 PE=1 SV=2	71	17	27	16	312	34.3	8.43
P49756	High	RNA-binding protein 25 OS=Homo sapiens OX=9606 GN=RBM25 PE=1 SV=3	25	18	25	18	843	100.1	6.32
Q13085	High	Acetyl-CoA carboxylase 1 OS=Homo sapiens OX=9606 GN=ACACA PE=1 SV=2	16	23	24	23	2346	265.4	6.37
Q08043	High	Alpha-actinin-3 OS=Homo sapiens OX=9606 GN=ACTN3 PE=1 SV=2	14	13	27	1	901	103.2	5.52
Q16698	High	2,4-dienoyl-CoA reductase, mitochondrial OS=Homo sapiens OX=9606 GN=DECR1 PE=1 SV=1	50	13	27	13	335	36	9.28
P49257	High	Protein ERGIC-53 OS=Homo sapiens OX=9606 GN=LMAN1 PE=1 SV=2	35	15	32	14	510	57.5	6.77
O14744	High	Protein arginine N-methyltransferase 5 OS=Homo sapiens OX=9606 GN=PRMT5 PE=1 SV=4	34	16	29	16	637	72.6	6.29
Q9UH99	High	SUN domain-containing protein 2 OS=Homo sapiens OX=9606 GN=SUN2 PE=1 SV=3	35	16	21	16	717	80.3	6.73
Q9H4A4	High	Aminopeptidase B OS=Homo sapiens OX=9606 GN=RNPEP PE=1 SV=2	35	16	28	16	650	72.5	5.74
Q9UBT2	High	SUMO-activating enzyme subunit 2 OS=Homo sapiens OX=9606 GN=UBA2 PE=1 SV=2	40	14	22	14	640	71.2	5.29
P18031	High	Tyrosine-protein phosphatase non-receptor type 1 OS=Homo sapiens OX=9606 GN=PTPN1 PE=1 SV=1	49	16	25	16	435	49.9	6.27
P62829	High	60S ribosomal protein L23 OS=Homo sapiens OX=9606 GN=RPL23 PE=1 SV=1	64	9	52	9	140	14.9	10.51
Q06481	High	Amyloid-like protein 2 OS=Homo sapiens OX=9606 GN=APLP2 PE=1 SV=2	27	15	22	15	763	86.9	4.79
Q15907	High	Ras-related protein Rab-11B OS=Homo sapiens OX=9606 GN=RAB11B PE=1 SV=4	52	11	32	1	218	24.5	5.94
Q92900	High	Regulator of nonsense transcripts 1 OS=Homo sapiens OX=9606 GN=UPF1 PE=1 SV=2	27	20	22	20	1129	124.3	6.61
Q9BVJ6	High	U3 small nucleolar RNA-associated protein 14 homolog A OS=Homo sapiens OX=9606 GN=UTP14A PE=1 SV=1	36	21	28	21	771	87.9	7.87
P48047	High	ATP synthase subunit O, mitochondrial OS=Homo sapiens OX=9606 GN=ATP5PO PE=1 SV=1	57	10	29	10	213	23.3	9.96
Q9BRR6	High	ADP-dependent glucokinase OS=Homo sapiens OX=9606 GN=ADPGK PE=1 SV=1	40	11	21	11	497	54.1	6.2
E7EUC7	High	UTP--glucose-1-phosphate uridylyltransferase OS=Homo sapiens OX=9606 GN=UGP2 PE=1 SV=1	43	15	24	15	517	57.8	8.13
P62879	High	Guanine nucleotide-binding protein G(I)/G(S)/G(T) subunit beta-2 OS=Homo sapiens OX=9606 GN=GNB2 PE=1 SV=3	47	12	30	5	340	37.3	6
O75306	High	NADH dehydrogenase [ubiquinone] iron-sulfur protein 2, mitochondrial OS=Homo sapiens OX=9606 GN=NDUFS2 PE=1 SV=2	49	14	23	14	463	52.5	7.55
O15020	High	Spectrin beta chain, non-erythrocytic 2 OS=Homo sapiens OX=9606 GN=SPTBN2 PE=1 SV=3	12	20	30	11	2390	271.2	6.11
K7ER00	High	Phenylalanine--tRNA ligase alpha subunit OS=Homo sapiens OX=9606 GN=FARSA PE=1 SV=1	39	14	22	14	548	62.4	7.84
P12004	High	Proliferating cell nuclear antigen OS=Homo sapiens OX=9606 GN=PCNA PE=1 SV=1	64	11	20	11	261	28.8	4.69
P11216	High	Glycogen phosphorylase, brain form OS=Homo sapiens OX=9606 GN=PYGB PE=1 SV=5	31	20	24	16	843	96.6	6.86
Q15758	High	Neutral amino acid transporter B(0) OS=Homo sapiens OX=9606 GN=SLC1A5 PE=1 SV=2	30	12	31	12	541	56.6	5.48
E9PK91	High	Bcl-2-associated transcription factor 1 OS=Homo sapiens OX=9606 GN=BCLAF1 PE=1 SV=1	27	20	28	20	871	100.3	9.95
Q01650	High	Large neutral amino acids transporter small subunit 1 OS=Homo sapiens OX=9606 GN=SLC7A5 PE=1 SV=2	18	8	30	8	507	55	7.72
Q02880	High	DNA topoisomerase 2-beta OS=Homo sapiens OX=9606 GN=TOP2B PE=1 SV=3	15	20	29	13	1626	183.2	8
P20073	High	Annexin A7 OS=Homo sapiens OX=9606 GN=ANXA7 PE=1 SV=3	33	14	29	14	488	52.7	5.68
Q9GZL7	High	Ribosome biogenesis protein WDR12 OS=Homo sapiens OX=9606 GN=WDR12 PE=1 SV=2	49	14	25	14	423	47.7	5.9
P30050	High	60S ribosomal protein L12 OS=Homo sapiens OX=9606 GN=RPL12 PE=1 SV=1	69	10	38	10	165	17.8	9.42
Q96DI7	High	U5 small nuclear ribonucleoprotein 40 kDa protein OS=Homo sapiens OX=9606 GN=SNRNP40 PE=1 SV=1	59	15	22	15	357	39.3	8.1
P84085	High	ADP-ribosylation factor 5 OS=Homo sapiens OX=9606 GN=ARF5 PE=1 SV=2	80	11	30	6	180	20.5	6.79
Q96HE7	High	ERO1-like protein alpha OS=Homo sapiens OX=9606 GN=ERO1A PE=1 SV=2	49	14	22	14	468	54.4	5.68
Q5SRN5	High	HLA class I histocompatibility antigen, A alpha chain OS=Homo sapiens OX=9606 GN=HLA-A PE=1 SV=2	29	8	31	2	371	41.3	6
Q15286	High	Ras-related protein Rab-35 OS=Homo sapiens OX=9606 GN=RAB35 PE=1 SV=1	69	11	36	9	201	23	8.29
P00734	High	Prothrombin OS=Homo sapiens OX=9606 GN=F2 PE=1 SV=2	11	8	29	8	622	70	5.9
P83111	High	Serine beta-lactamase-like protein LACTB, mitochondrial OS=Homo sapiens OX=9606 GN=LACTB PE=1 SV=2	30	12	20	12	547	60.7	8.53
P39748	High	Flap endonuclease 1 OS=Homo sapiens OX=9606 GN=FEN1 PE=1 SV=1	41	10	23	10	380	42.6	8.62
O94905	High	Erlin-2 OS=Homo sapiens OX=9606 GN=ERLIN2 PE=1 SV=1	46	13	27	10	339	37.8	5.62
P61160	High	Actin-related protein 2 OS=Homo sapiens OX=9606 GN=ACTR2 PE=1 SV=1	43	11	26	1	394	44.7	6.74
Q14126	High	Desmoglein-2 OS=Homo sapiens OX=9606 GN=DSG2 PE=1 SV=2	27	16	22	16	1118	122.2	5.24
P30086	High	Phosphatidylethanolamine-binding protein 1 OS=Homo sapiens OX=9606 GN=PEBP1 PE=1 SV=3	79	10	28	10	187	21	7.53
Q9BYG3	High	MKI67 FHA domain-interacting nucleolar phosphoprotein OS=Homo sapiens OX=9606 GN=NIFK PE=1 SV=1	53	14	26	14	293	34.2	9.88
Q02543	High	60S ribosomal protein L18a OS=Homo sapiens OX=9606 GN=RPL18A PE=1 SV=2	47	10	32	10	176	20.7	10.71
B5ME19	High	Eukaryotic translation initiation factor 3 subunit C-like protein OS=Homo sapiens OX=9606 GN=EIF3CL PE=1 SV=1	26	19	26	19	914	105.4	5.64
Q96GQ7	High	Probable ATP-dependent RNA helicase DDX27 OS=Homo sapiens OX=9606 GN=DDX27 PE=1 SV=2	31	21	29	21	796	89.8	9.28
P36957	High	Dihydrolipoyllysine-residue succinyltransferase component of 2-oxoglutarate dehydrogenase complex, mitochondrial OS=Homo sapiens OX=9606 GN=DLST PE=1 SV=4	36	13	26	13	453	48.7	8.95
G3V1L9	High	Tight junction protein 1 (Zona occludens 1), isoform CRA_a OS=Homo sapiens OX=9606 GN=TJP1 PE=1 SV=1	16	20	25	20	1768	197.3	6.67
Q5T4U5	High	Acyl-Coenzyme A dehydrogenase, C-4 to C-12 straight chain, isoform CRA_a OS=Homo sapiens OX=9606 GN=ACADM PE=1 SV=1	40	15	27	15	454	50.2	7.8
P22307	High	Non-specific lipid-transfer protein OS=Homo sapiens OX=9606 GN=SCP2 PE=1 SV=2	26	14	35	14	547	59	6.89
P50402	High	Emerin OS=Homo sapiens OX=9606 GN=EMD PE=1 SV=1	65	12	29	12	254	29	5.5
Q16740	High	ATP-dependent Clp protease proteolytic subunit, mitochondrial OS=Homo sapiens OX=9606 GN=CLPP PE=1 SV=1	38	9	30	9	277	30.2	8.09
P62888	High	60S ribosomal protein L30 OS=Homo sapiens OX=9606 GN=RPL30 PE=1 SV=2	72	9	28	8	115	12.8	9.63
H7C2Q8	High	EBNA1 binding protein 2, isoform CRA_d OS=Homo sapiens OX=9606 GN=EBNA1BP2 PE=1 SV=1	33	11	29	11	361	40.7	9.98
P55263	High	Adenosine kinase OS=Homo sapiens OX=9606 GN=ADK PE=1 SV=2	60	13	20	13	362	40.5	6.7
P62491	High	Ras-related protein Rab-11A OS=Homo sapiens OX=9606 GN=RAB11A PE=1 SV=3	54	11	32	1	216	24.4	6.57
Q9Y5L0	High	Transportin-3 OS=Homo sapiens OX=9606 GN=TNPO3 PE=1 SV=3	28	18	20	18	923	104.1	5.57
Q12888	High	TP53-binding protein 1 OS=Homo sapiens OX=9606 GN=TP53BP1 PE=1 SV=2	20	20	22	20	1972	213.4	4.7
Q14157	High	Ubiquitin-associated protein 2-like OS=Homo sapiens OX=9606 GN=UBAP2L PE=1 SV=2	27	16	24	16	1087	114.5	7.11
Q9NVH1	High	DnaJ homolog subfamily C member 11 OS=Homo sapiens OX=9606 GN=DNAJC11 PE=1 SV=2	34	16	26	16	559	63.2	8.4
A0A024QZP7	High	Cell division cycle 2, G1 to S and G2 to M, isoform CRA_a OS=Homo sapiens OX=9606 GN=CDK1 PE=1 SV=1	56	14	24	11	297	34.1	8.4
P19623	High	Spermidine synthase OS=Homo sapiens OX=9606 GN=SRM PE=1 SV=1	66	12	19	12	302	33.8	5.49
Q02809	High	Procollagen-lysine,2-oxoglutarate 5-dioxygenase 1 OS=Homo sapiens OX=9606 GN=PLOD1 PE=1 SV=2	32	17	28	17	727	83.5	6.95
P08754	High	Guanine nucleotide-binding protein G(i) subunit alpha OS=Homo sapiens OX=9606 GN=GNAI3 PE=1 SV=3	51	13	29	6	354	40.5	5.69
P09382	High	Galectin-1 OS=Homo sapiens OX=9606 GN=LGALS1 PE=1 SV=2	76	8	33	8	135	14.7	5.5
P20618	High	Proteasome subunit beta type-1 OS=Homo sapiens OX=9606 GN=PSMB1 PE=1 SV=2	56	11	24	11	241	26.5	8.13
P84243	High	Histone H3.3 OS=Homo sapiens OX=9606 GN=H3-3A PE=1 SV=2	60	11	48	2	136	15.3	11.27
Q9Y266	High	Nuclear migration protein nudC OS=Homo sapiens OX=9606 GN=NUDC PE=1 SV=1	42	15	31	15	331	38.2	5.38
P62750	High	60S ribosomal protein L23a OS=Homo sapiens OX=9606 GN=RPL23A PE=1 SV=1	51	11	33	11	156	17.7	10.45
Q9Y512	High	Sorting and assembly machinery component 50 homolog OS=Homo sapiens OX=9606 GN=SAMM50 PE=1 SV=3	40	16	29	16	469	51.9	6.9
Q9P2E9	High	Ribosome-binding protein 1 OS=Homo sapiens OX=9606 GN=RRBP1 PE=1 SV=5	34	22	28	22	1410	152.4	8.6
Q15269	High	Periodic tryptophan protein 2 homolog OS=Homo sapiens OX=9606 GN=PWP2 PE=2 SV=2	23	15	22	12	919	102.4	6.15
Q15942	High	Zyxin OS=Homo sapiens OX=9606 GN=ZYX PE=1 SV=1	34	12	27	12	572	61.2	6.67
P62241	High	40S ribosomal protein S8 OS=Homo sapiens OX=9606 GN=RPS8 PE=1 SV=2	46	9	38	9	208	24.2	10.32
P47755	High	F-actin-capping protein subunit alpha-2 OS=Homo sapiens OX=9606 GN=CAPZA2 PE=1 SV=3	56	10	23	8	286	32.9	5.85
Q02978	High	Mitochondrial 2-oxoglutarate/malate carrier protein OS=Homo sapiens OX=9606 GN=SLC25A11 PE=1 SV=3	45	11	23	11	314	34	9.91
P62280	High	40S ribosomal protein S11 OS=Homo sapiens OX=9606 GN=RPS11 PE=1 SV=3	56	11	38	11	158	18.4	10.3
Q9H2U2	High	Inorganic pyrophosphatase 2, mitochondrial OS=Homo sapiens OX=9606 GN=PPA2 PE=1 SV=2	51	13	27	11	334	37.9	7.39
P11172	High	Uridine 5'-monophosphate synthase OS=Homo sapiens OX=9606 GN=UMPS PE=1 SV=1	43	14	24	14	480	52.2	7.24
G3V180	High	Dipeptidyl peptidase 3 OS=Homo sapiens OX=9606 GN=DPP3 PE=1 SV=1	35	16	21	16	757	84.3	5.03
P62263	High	40S ribosomal protein S14 OS=Homo sapiens OX=9606 GN=RPS14 PE=1 SV=3	64	7	27	7	151	16.3	10.05
Q15436	High	Protein transport protein Sec23A OS=Homo sapiens OX=9606 GN=SEC23A PE=1 SV=2	31	15	20	13	765	86.1	7.08
Q13347	High	Eukaryotic translation initiation factor 3 subunit I OS=Homo sapiens OX=9606 GN=EIF3I PE=1 SV=1	54	12	21	12	325	36.5	5.64
P62753	High	40S ribosomal protein S6 OS=Homo sapiens OX=9606 GN=RPS6 PE=1 SV=1	33	8	42	8	249	28.7	10.84
Q53GQ0	High	Very-long-chain 3-oxoacyl-CoA reductase OS=Homo sapiens OX=9606 GN=HSD17B12 PE=1 SV=2	49	11	23	11	312	34.3	9.32
P62266	High	40S ribosomal protein S23 OS=Homo sapiens OX=9606 GN=RPS23 PE=1 SV=3	50	8	26	8	143	15.8	10.49
Q14151	High	Scaffold attachment factor B2 OS=Homo sapiens OX=9606 GN=SAFB2 PE=1 SV=1	24	19	26	11	953	107.4	6.16
Q9H0D6	High	5'-3' exoribonuclease 2 OS=Homo sapiens OX=9606 GN=XRN2 PE=1 SV=1	24	16	20	16	950	108.5	7.47
P31942	High	Heterogeneous nuclear ribonucleoprotein H3 OS=Homo sapiens OX=9606 GN=HNRNPH3 PE=1 SV=2	49	10	29	9	346	36.9	6.87
P30622	High	CAP-Gly domain-containing linker protein 1 OS=Homo sapiens OX=9606 GN=CLIP1 PE=1 SV=2	19	18	22	18	1438	162.1	5.36
Q93008	High	Probable ubiquitin carboxyl-terminal hydrolase FAF-X OS=Homo sapiens OX=9606 GN=USP9X PE=1 SV=3	11	21	24	21	2570	292.1	5.8
P30520	High	Adenylosuccinate synthetase isozyme 2 OS=Homo sapiens OX=9606 GN=ADSS2 PE=1 SV=3	40	13	22	13	456	50.1	6.55
P63096	High	Guanine nucleotide-binding protein G(i) subunit alpha-1 OS=Homo sapiens OX=9606 GN=GNAI1 PE=1 SV=2	53	14	24	7	354	40.3	5.97
Q08945	High	FACT complex subunit SSRP1 OS=Homo sapiens OX=9606 GN=SSRP1 PE=1 SV=1	29	16	25	16	709	81	6.87
Q96P70	High	Importin-9 OS=Homo sapiens OX=9606 GN=IPO9 PE=1 SV=3	23	13	18	13	1041	115.9	4.81
Q93050	High	V-type proton ATPase 116 kDa subunit a isoform 1 OS=Homo sapiens OX=9606 GN=ATP6V0A1 PE=1 SV=3	25	13	19	12	837	96.4	6.43
P25398	High	40S ribosomal protein S12 OS=Homo sapiens OX=9606 GN=RPS12 PE=1 SV=3	54	7	29	7	132	14.5	7.21
P07384	High	Calpain-1 catalytic subunit OS=Homo sapiens OX=9606 GN=CAPN1 PE=1 SV=1	37	19	26	19	714	81.8	5.67
Q969Z0	High	FAST kinase domain-containing protein 4 OS=Homo sapiens OX=9606 GN=TBRG4 PE=1 SV=1	35	13	17	13	631	70.7	7.42
Q9Y696	High	Chloride intracellular channel protein 4 OS=Homo sapiens OX=9606 GN=CLIC4 PE=1 SV=4	68	15	28	14	253	28.8	5.59
P67775	High	Serine/threonine-protein phosphatase 2A catalytic subunit alpha isoform OS=Homo sapiens OX=9606 GN=PPP2CA PE=1 SV=1	59	12	25	2	309	35.6	5.54
A0A0C4DGB5	High	Calpastatin OS=Homo sapiens OX=9606 GN=CAST PE=1 SV=1	29	14	22	14	754	81	5.1
A0A087WT44	High	Heme oxygenase 2 OS=Homo sapiens OX=9606 GN=HMOX2 PE=1 SV=1	53	15	21	15	370	41.6	5.44
P11233	High	Ras-related protein Ral-A OS=Homo sapiens OX=9606 GN=RALA PE=1 SV=1	50	8	19	4	206	23.6	7.11
P61313	High	60S ribosomal protein L15 OS=Homo sapiens OX=9606 GN=RPL15 PE=1 SV=2	46	11	24	11	204	24.1	11.62
Q9NTI5	High	Sister chromatid cohesion protein PDS5 homolog B OS=Homo sapiens OX=9606 GN=PDS5B PE=1 SV=1	20	21	24	19	1447	164.6	8.47
Q9Y3T9	High	Nucleolar complex protein 2 homolog OS=Homo sapiens OX=9606 GN=NOC2L PE=1 SV=4	28	16	27	16	749	84.9	5.62
A0A140T953	High	HLA class I histocompatibility antigen, B alpha chain (Fragment) OS=Homo sapiens OX=9606 GN=HLA-B PE=1 SV=1	45	8	31	3	246	27.7	6.44
Q96KR1	High	Zinc finger RNA-binding protein OS=Homo sapiens OX=9606 GN=ZFR PE=1 SV=2	23	15	21	15	1074	116.9	9.04
Q96JJ7	High	Protein disulfide-isomerase TMX3 OS=Homo sapiens OX=9606 GN=TMX3 PE=1 SV=2	43	15	20	15	454	51.8	4.91
O00541	High	Pescadillo homolog OS=Homo sapiens OX=9606 GN=PES1 PE=1 SV=1	35	18	25	18	588	68	7.33
Q08379	High	Golgin subfamily A member 2 OS=Homo sapiens OX=9606 GN=GOLGA2 PE=1 SV=3	27	16	21	16	1002	113	5.02
A0A0J9YVP6	High	Poly(U)-binding-splicing factor PUF60 (Fragment) OS=Homo sapiens OX=9606 GN=PUF60 PE=1 SV=1	37	11	20	1	534	57.4	5.35
Q07666	High	KH domain-containing, RNA-binding, signal transduction-associated protein 1 OS=Homo sapiens OX=9606 GN=KHDRBS1 PE=1 SV=1	29	10	31	10	443	48.2	8.66
P21399	High	Cytoplasmic aconitate hydratase OS=Homo sapiens OX=9606 GN=ACO1 PE=1 SV=3	24	13	20	13	889	98.3	6.68
Q8NI27	High	THO complex subunit 2 OS=Homo sapiens OX=9606 GN=THOC2 PE=1 SV=2	17	18	23	18	1593	182.7	8.44
X6RLX0	High	ELKS/Rab6-interacting/CAST family member 1 OS=Homo sapiens OX=9606 GN=ERC1 PE=1 SV=1	20	18	24	18	1120	128.4	5.97
Q9UBQ7	High	Glyoxylate reductase/hydroxypyruvate reductase OS=Homo sapiens OX=9606 GN=GRHPR PE=1 SV=1	53	13	19	13	328	35.6	7.39
Q7KZ85	High	Transcription elongation factor SPT6 OS=Homo sapiens OX=9606 GN=SUPT6H PE=1 SV=2	16	18	21	18	1726	198.9	4.91
Q16630	High	Cleavage and polyadenylation specificity factor subunit 6 OS=Homo sapiens OX=9606 GN=CPSF6 PE=1 SV=2	24	9	20	9	551	59.2	7.15
Q9NZB2	High	Constitutive coactivator of PPAR-gamma-like protein 1 OS=Homo sapiens OX=9606 GN=FAM120A PE=1 SV=2	20	18	23	18	1118	121.8	8.88
Q9H845	High	Complex I assembly factor ACAD9, mitochondrial OS=Homo sapiens OX=9606 GN=ACAD9 PE=1 SV=1	38	16	24	16	621	68.7	7.96
E7EPK1	High	Septin-7 OS=Homo sapiens OX=9606 GN=SEPTIN7 PE=1 SV=2	37	14	25	12	437	50.7	8.63
Q14103	High	Heterogeneous nuclear ribonucleoprotein D0 OS=Homo sapiens OX=9606 GN=HNRNPD PE=1 SV=1	25	10	30	7	355	38.4	7.81
Q8N1G4	High	Leucine-rich repeat-containing protein 47 OS=Homo sapiens OX=9606 GN=LRRC47 PE=1 SV=1	39	13	19	13	583	63.4	8.28
Q9BTT0	High	Acidic leucine-rich nuclear phosphoprotein 32 family member E OS=Homo sapiens OX=9606 GN=ANP32E PE=1 SV=1	43	9	24	9	268	30.7	3.85
Q9H9P8	High	L-2-hydroxyglutarate dehydrogenase, mitochondrial OS=Homo sapiens OX=9606 GN=L2HGDH PE=1 SV=3	54	16	22	16	463	50.3	8.15
Q9UHD8	High	Septin-9 OS=Homo sapiens OX=9606 GN=SEPTIN9 PE=1 SV=2	34	16	23	16	586	65.4	8.97
Q8WWM7	High	Ataxin-2-like protein OS=Homo sapiens OX=9606 GN=ATXN2L PE=1 SV=2	22	17	24	17	1075	113.3	8.59
P05187	High	Alkaline phosphatase, placental type OS=Homo sapiens OX=9606 GN=ALPP PE=1 SV=2	40	14	19	11	535	57.9	6.29
Q7Z2W4	High	Zinc finger CCCH-type antiviral protein 1 OS=Homo sapiens OX=9606 GN=ZC3HAV1 PE=1 SV=3	28	17	22	17	902	101.4	8.4
F5H6T1	High	Actin-related protein 2 OS=Homo sapiens OX=9606 GN=ACTR2 PE=1 SV=2	50	11	24	1	339	38.8	6.27
P61020	High	Ras-related protein Rab-5B OS=Homo sapiens OX=9606 GN=RAB5B PE=1 SV=1	59	9	20	6	215	23.7	8.13
P46782	High	40S ribosomal protein S5 OS=Homo sapiens OX=9606 GN=RPS5 PE=1 SV=4	45	9	25	9	204	22.9	9.72
P01023	High	Alpha-2-macroglobulin OS=Homo sapiens OX=9606 GN=A2M PE=1 SV=3	7	11	43	9	1474	163.2	6.46
P61019	High	Ras-related protein Rab-2A OS=Homo sapiens OX=9606 GN=RAB2A PE=1 SV=1	60	12	24	5	212	23.5	6.54
Q9BQ52	High	Zinc phosphodiesterase ELAC protein 2 OS=Homo sapiens OX=9606 GN=ELAC2 PE=1 SV=2	34	15	16	15	826	92.2	7.9
P52888	High	Thimet oligopeptidase OS=Homo sapiens OX=9606 GN=THOP1 PE=1 SV=2	30	15	24	15	689	78.8	6.05
P15559	High	NAD(P)H dehydrogenase [quinone] 1 OS=Homo sapiens OX=9606 GN=NQO1 PE=1 SV=1	35	9	24	9	274	30.8	8.88
Q9GZR7	High	ATP-dependent RNA helicase DDX24 OS=Homo sapiens OX=9606 GN=DDX24 PE=1 SV=1	29	16	18	16	859	96.3	9.06
P62834	High	Ras-related protein Rap-1A OS=Homo sapiens OX=9606 GN=RAP1A PE=1 SV=1	49	8	17	3	184	21	6.67
P56537	High	Eukaryotic translation initiation factor 6 OS=Homo sapiens OX=9606 GN=EIF6 PE=1 SV=1	73	10	21	10	245	26.6	4.68
Q13283	High	Ras GTPase-activating protein-binding protein 1 OS=Homo sapiens OX=9606 GN=G3BP1 PE=1 SV=1	42	13	26	12	466	52.1	5.52
O15144	High	Actin-related protein 2/3 complex subunit 2 OS=Homo sapiens OX=9606 GN=ARPC2 PE=1 SV=1	51	13	30	13	300	34.3	7.36
P62244	High	40S ribosomal protein S15a OS=Homo sapiens OX=9606 GN=RPS15A PE=1 SV=2	57	7	28	2	130	14.8	10.13
Q02241	High	Kinesin-like protein KIF23 OS=Homo sapiens OX=9606 GN=KIF23 PE=1 SV=3	24	14	18	14	960	110	8.51
P33527	High	Multidrug resistance-associated protein 1 OS=Homo sapiens OX=9606 GN=ABCC1 PE=1 SV=3	15	15	17	14	1531	171.5	7.11
O95782	High	AP-2 complex subunit alpha-1 OS=Homo sapiens OX=9606 GN=AP2A1 PE=1 SV=3	26	15	21	13	977	107.5	7.03
Q9NUJ1	High	Mycophenolic acid acyl-glucuronide esterase, mitochondrial OS=Homo sapiens OX=9606 GN=ABHD10 PE=1 SV=1	51	11	21	11	306	33.9	8.57
Q9Y281	High	Cofilin-2 OS=Homo sapiens OX=9606 GN=CFL2 PE=1 SV=1	59	11	30	5	166	18.7	7.88
Q9BTU6	High	Phosphatidylinositol 4-kinase type 2-alpha OS=Homo sapiens OX=9606 GN=PI4K2A PE=1 SV=1	50	18	24	18	479	54	8.29
Q969S9	High	Ribosome-releasing factor 2, mitochondrial OS=Homo sapiens OX=9606 GN=GFM2 PE=1 SV=1	26	13	19	13	779	86.5	6.51
P62873	High	Guanine nucleotide-binding protein G(I)/G(S)/G(T) subunit beta-1 OS=Homo sapiens OX=9606 GN=GNB1 PE=1 SV=3	54	13	28	6	340	37.4	6
O95747	High	Serine/threonine-protein kinase OSR1 OS=Homo sapiens OX=9606 GN=OXSR1 PE=1 SV=1	35	13	22	11	527	58	6.43
P62249	High	40S ribosomal protein S16 OS=Homo sapiens OX=9606 GN=RPS16 PE=1 SV=2	54	12	32	12	146	16.4	10.21
O60318	High	Germinal-center associated nuclear protein OS=Homo sapiens OX=9606 GN=MCM3AP PE=1 SV=2	18	18	19	18	1980	218.3	6.39
O15173	High	Membrane-associated progesterone receptor component 2 OS=Homo sapiens OX=9606 GN=PGRMC2 PE=1 SV=1	38	9	23	8	223	23.8	4.88
P42126	High	Enoyl-CoA delta isomerase 1, mitochondrial OS=Homo sapiens OX=9606 GN=ECI1 PE=1 SV=1	45	11	27	11	302	32.8	8.54
E9PF18	High	Hydroxyacyl-coenzyme A dehydrogenase, mitochondrial OS=Homo sapiens OX=9606 GN=HADH PE=1 SV=2	36	10	25	10	390	42.1	9.26
P78406	High	mRNA export factor OS=Homo sapiens OX=9606 GN=RAE1 PE=1 SV=1	33	9	25	9	368	40.9	7.83
P30048	High	Thioredoxin-dependent peroxide reductase, mitochondrial OS=Homo sapiens OX=9606 GN=PRDX3 PE=1 SV=3	45	7	23	7	256	27.7	7.78
P21291	High	Cysteine and glycine-rich protein 1 OS=Homo sapiens OX=9606 GN=CSRP1 PE=1 SV=3	65	11	24	11	193	20.6	8.57
Q13151	High	Heterogeneous nuclear ribonucleoprotein A0 OS=Homo sapiens OX=9606 GN=HNRNPA0 PE=1 SV=1	33	8	33	6	305	30.8	9.29
A0A087X020	High	Ribosome maturation protein SBDS OS=Homo sapiens OX=9606 GN=SBDS PE=1 SV=1	59	13	19	13	250	28.8	8.75
D6RBZ0	High	Heterogeneous nuclear ribonucleoprotein A/B OS=Homo sapiens OX=9606 GN=HNRNPAB PE=1 SV=1	33	11	32	9	327	35.7	6.95
Q13451	High	Peptidyl-prolyl cis-trans isomerase FKBP5 OS=Homo sapiens OX=9606 GN=FKBP5 PE=1 SV=2	41	15	21	15	457	51.2	5.9
P31949	High	Protein S100-A11 OS=Homo sapiens OX=9606 GN=S100A11 PE=1 SV=2	73	6	35	6	105	11.7	7.12
Q9H361	High	Polyadenylate-binding protein 3 OS=Homo sapiens OX=9606 GN=PABPC3 PE=1 SV=2	22	11	26	1	631	70	9.67
Q9Y295	High	Developmentally-regulated GTP-binding protein 1 OS=Homo sapiens OX=9606 GN=DRG1 PE=1 SV=1	50	14	20	13	367	40.5	8.9
O75396	High	Vesicle-trafficking protein SEC22b OS=Homo sapiens OX=9606 GN=SEC22B PE=1 SV=4	48	8	28	8	215	24.6	6.92
P30740	High	Leukocyte elastase inhibitor OS=Homo sapiens OX=9606 GN=SERPINB1 PE=1 SV=1	49	14	24	14	379	42.7	6.28
O14715	High	RANBP2-like and GRIP domain-containing protein 8 OS=Homo sapiens OX=9606 GN=RGPD8 PE=1 SV=2	15	21	27	2	1765	198.9	6.49
Q9BWD1	High	Acetyl-CoA acetyltransferase, cytosolic OS=Homo sapiens OX=9606 GN=ACAT2 PE=1 SV=2	52	11	16	11	397	41.3	6.92
J3KQ32	High	Obg-like ATPase 1 OS=Homo sapiens OX=9606 GN=OLA1 PE=1 SV=1	52	15	22	15	416	46.9	8.06
Q9HCC0	High	Methylcrotonoyl-CoA carboxylase beta chain, mitochondrial OS=Homo sapiens OX=9606 GN=MCCC2 PE=1 SV=1	36	12	14	12	563	61.3	7.68
A0A494C028	High	Protein DEK OS=Homo sapiens OX=9606 GN=DEK PE=1 SV=1	31	13	27	13	380	43.2	8.57
O00203	High	AP-3 complex subunit beta-1 OS=Homo sapiens OX=9606 GN=AP3B1 PE=1 SV=3	23	17	19	17	1094	121.2	6.04
Q15363	High	Transmembrane emp24 domain-containing protein 2 OS=Homo sapiens OX=9606 GN=TMED2 PE=1 SV=1	31	6	19	6	201	22.7	5.17
P51572	High	B-cell receptor-associated protein 31 OS=Homo sapiens OX=9606 GN=BCAP31 PE=1 SV=3	48	13	25	13	246	28	8.44
H3BN98	High	Uncharacterized protein (Fragment) OS=Homo sapiens OX=9606 PE=4 SV=2	38	8	26	3	237	27.2	9.55
P36952	High	Serpin B5 OS=Homo sapiens OX=9606 GN=SERPINB5 PE=1 SV=2	59	15	20	15	375	42.1	6.05
P43897	High	Elongation factor Ts, mitochondrial OS=Homo sapiens OX=9606 GN=TSFM PE=1 SV=2	45	9	18	9	325	35.4	8.38
Q9BTC0	High	Death-inducer obliterator 1 OS=Homo sapiens OX=9606 GN=DIDO1 PE=1 SV=5	16	20	22	20	2240	243.7	7.88
Q92797	High	Symplekin OS=Homo sapiens OX=9606 GN=SYMPK PE=1 SV=2	20	15	18	15	1274	141.1	6.13
F8W7C6	High	60S ribosomal protein L10 OS=Homo sapiens OX=9606 GN=RPL10 PE=1 SV=2	58	9	41	1	163	18.6	9.95
P13647	High	Keratin, type II cytoskeletal 5 OS=Homo sapiens OX=9606 GN=KRT5 PE=1 SV=3	30	21	32	9	590	62.3	7.74
P61586	High	Transforming protein RhoA OS=Homo sapiens OX=9606 GN=RHOA PE=1 SV=1	72	11	25	4	193	21.8	6.1
Q32MZ4	High	Leucine-rich repeat flightless-interacting protein 1 OS=Homo sapiens OX=9606 GN=LRRFIP1 PE=1 SV=2	28	17	19	16	808	89.2	4.65
P10599	High	Thioredoxin OS=Homo sapiens OX=9606 GN=TXN PE=1 SV=3	69	8	48	8	105	11.7	4.92
P13861	High	cAMP-dependent protein kinase type II-alpha regulatory subunit OS=Homo sapiens OX=9606 GN=PRKAR2A PE=1 SV=2	38	11	17	11	404	45.5	5.07
Q2NL82	High	Pre-rRNA-processing protein TSR1 homolog OS=Homo sapiens OX=9606 GN=TSR1 PE=1 SV=1	28	14	21	14	804	91.8	7.42
P50995	High	Annexin A11 OS=Homo sapiens OX=9606 GN=ANXA11 PE=1 SV=1	30	13	26	13	505	54.4	7.65
O75521	High	Enoyl-CoA delta isomerase 2, mitochondrial OS=Homo sapiens OX=9606 GN=ECI2 PE=1 SV=4	36	11	22	11	394	43.6	9
F5GYQ1	High	V-type proton ATPase subunit OS=Homo sapiens OX=9606 GN=ATP6V0D1 PE=1 SV=1	38	11	17	11	392	44.6	5.14
A1L0T0	High	Acetolactate synthase-like protein OS=Homo sapiens OX=9606 GN=ILVBL PE=1 SV=2	35	15	17	15	632	67.8	8.15
Q9UKX7	High	Nuclear pore complex protein Nup50 OS=Homo sapiens OX=9606 GN=NUP50 PE=1 SV=2	40	13	17	13	468	50.1	7.06
Q15397	High	Pumilio homolog 3 OS=Homo sapiens OX=9606 GN=PUM3 PE=1 SV=3	27	10	17	10	648	73.5	9.64
Q8TEX9	High	Importin-4 OS=Homo sapiens OX=9606 GN=IPO4 PE=1 SV=2	22	15	20	15	1081	118.6	4.96
Q13619	High	Cullin-4A OS=Homo sapiens OX=9606 GN=CUL4A PE=1 SV=3	23	16	19	8	759	87.6	8.13
Q52LJ0	High	Protein FAM98B OS=Homo sapiens OX=9606 GN=FAM98B PE=1 SV=2	48	13	22	11	433	45.5	8.69
P00390	High	Glutathione reductase, mitochondrial OS=Homo sapiens OX=9606 GN=GSR PE=1 SV=2	45	14	18	14	522	56.2	8.5
O15226	High	NF-kappa-B-repressing factor OS=Homo sapiens OX=9606 GN=NKRF PE=1 SV=2	30	15	19	15	690	77.6	8.79
P46781	High	40S ribosomal protein S9 OS=Homo sapiens OX=9606 GN=RPS9 PE=1 SV=3	37	11	31	11	194	22.6	10.65
X5CMH5	High	Antigen peptide transporter 2 OS=Homo sapiens OX=9606 GN=TAP2 PE=1 SV=1	31	15	18	14	703	77.6	7.85
A0A024R571	High	EH domain-containing protein 1 OS=Homo sapiens OX=9606 GN=EHD1 PE=1 SV=1	36	15	19	13	548	61.9	6.71
Q9Y224	High	RNA transcription, translation and transport factor protein OS=Homo sapiens OX=9606 GN=RTRAF PE=1 SV=1	50	9	15	9	244	28.1	6.65
Q09161	High	Nuclear cap-binding protein subunit 1 OS=Homo sapiens OX=9606 GN=NCBP1 PE=1 SV=1	32	16	19	16	790	91.8	6.43
E7EMB3	High	Calmodulin-2 OS=Homo sapiens OX=9606 GN=CALM2 PE=1 SV=1	36	8	33	8	196	21.7	4.56
Q8NBU5	High	ATPase family AAA domain-containing protein 1 OS=Homo sapiens OX=9606 GN=ATAD1 PE=1 SV=1	48	11	20	11	361	40.7	6.9
Q9Y3F4	High	Serine-threonine kinase receptor-associated protein OS=Homo sapiens OX=9606 GN=STRAP PE=1 SV=1	59	15	22	15	350	38.4	5.12
A0A0G2JPF8	High	Heterogeneous nuclear ribonucleoprotein C-like 4 OS=Homo sapiens OX=9606 GN=HNRNPCL4 PE=4 SV=1	20	8	32	1	293	32	5.68
Q9NTJ5	High	Phosphatidylinositide phosphatase SAC1 OS=Homo sapiens OX=9606 GN=SACM1L PE=1 SV=2	36	19	22	19	587	66.9	7.12
P11047	High	Laminin subunit gamma-1 OS=Homo sapiens OX=9606 GN=LAMC1 PE=1 SV=3	15	16	19	16	1609	177.5	5.12
Q8IYB8	High	ATP-dependent RNA helicase SUPV3L1, mitochondrial OS=Homo sapiens OX=9606 GN=SUPV3L1 PE=1 SV=1	27	15	21	15	786	87.9	7.99
Q8NBX0	High	Saccharopine dehydrogenase-like oxidoreductase OS=Homo sapiens OX=9606 GN=SCCPDH PE=1 SV=1	36	8	17	8	429	47.1	9.14
Q7L0Y3	High	tRNA methyltransferase 10 homolog C OS=Homo sapiens OX=9606 GN=TRMT10C PE=1 SV=2	43	15	21	15	403	47.3	9.36
P24539	High	ATP synthase F(0) complex subunit B1, mitochondrial OS=Homo sapiens OX=9606 GN=ATP5PB PE=1 SV=2	44	10	28	10	256	28.9	9.36
Q12849	High	G-rich sequence factor 1 OS=Homo sapiens OX=9606 GN=GRSF1 PE=1 SV=3	43	13	17	13	480	53.1	6.19
Q14533	High	Keratin, type II cuticular Hb1 OS=Homo sapiens OX=9606 GN=KRT81 PE=1 SV=3	27	14	31	6	505	54.9	5.47
P15291	High	Beta-1,4-galactosyltransferase 1 OS=Homo sapiens OX=9606 GN=B4GALT1 PE=1 SV=5	32	9	23	9	398	43.9	8.65
P62714	High	Serine/threonine-protein phosphatase 2A catalytic subunit beta isoform OS=Homo sapiens OX=9606 GN=PPP2CB PE=1 SV=1	56	11	20	1	309	35.6	5.43
A0A0C4DGQ5	High	Calpain small subunit 1 OS=Homo sapiens OX=9606 GN=CAPNS1 PE=1 SV=1	42	7	18	7	322	33.8	6.23
E9PHI4	High	SUN domain-containing protein 1 OS=Homo sapiens OX=9606 GN=SUN1 PE=1 SV=1	26	13	17	3	822	91.1	7.18
O43491	High	Band 4.1-like protein 2 OS=Homo sapiens OX=9606 GN=EPB41L2 PE=1 SV=1	21	14	19	14	1005	112.5	5.44
A0A2R8Y5P7	High	Probable histidine--tRNA ligase, mitochondrial OS=Homo sapiens OX=9606 GN=HARS2 PE=1 SV=1	43	15	24	8	512	57.5	8.02
O00764	High	Pyridoxal kinase OS=Homo sapiens OX=9606 GN=PDXK PE=1 SV=1	54	11	21	11	312	35.1	6.13
O14979	High	Heterogeneous nuclear ribonucleoprotein D-like OS=Homo sapiens OX=9606 GN=HNRNPDL PE=1 SV=3	37	14	27	12	420	46.4	9.57
A0A096LPI6	High	Utp12 domain-containing protein (Fragment) OS=Homo sapiens OX=9606 PE=4 SV=2	49	9	19	6	279	30.5	7.87
P31689	High	DnaJ homolog subfamily A member 1 OS=Homo sapiens OX=9606 GN=DNAJA1 PE=1 SV=2	47	13	19	13	397	44.8	7.08
Q9NRR5	High	Ubiquilin-4 OS=Homo sapiens OX=9606 GN=UBQLN4 PE=1 SV=2	41	11	14	8	601	63.8	5.22
M0QXB4	High	Coatomer protein complex, subunit epsilon, isoform CRA_g OS=Homo sapiens OX=9606 GN=COPE PE=1 SV=1	42	10	16	10	331	36.9	5.16
P62913	High	60S ribosomal protein L11 OS=Homo sapiens OX=9606 GN=RPL11 PE=1 SV=2	46	8	30	8	178	20.2	9.6
O00267	High	Transcription elongation factor SPT5 OS=Homo sapiens OX=9606 GN=SUPT5H PE=1 SV=1	26	17	21	17	1087	120.9	5.06
P09429	High	High mobility group protein B1 OS=Homo sapiens OX=9606 GN=HMGB1 PE=1 SV=3	34	12	25	10	215	24.9	5.74
P52294	High	Importin subunit alpha-5 OS=Homo sapiens OX=9606 GN=KPNA1 PE=1 SV=3	38	15	22	9	538	60.2	5.01
O14828	High	Secretory carrier-associated membrane protein 3 OS=Homo sapiens OX=9606 GN=SCAMP3 PE=1 SV=3	47	8	23	8	347	38.3	7.64
O43395	High	U4/U6 small nuclear ribonucleoprotein Prp3 OS=Homo sapiens OX=9606 GN=PRPF3 PE=1 SV=2	39	17	20	17	683	77.5	9.5
Q9NXF1	High	Testis-expressed protein 10 OS=Homo sapiens OX=9606 GN=TEX10 PE=1 SV=2	24	16	20	16	929	105.6	9.36
Q9UKM9	High	RNA-binding protein Raly OS=Homo sapiens OX=9606 GN=RALY PE=1 SV=1	41	12	26	12	306	32.4	9.17
P53701	High	Cytochrome c-type heme lyase OS=Homo sapiens OX=9606 GN=HCCS PE=1 SV=1	55	11	21	11	268	30.6	6.68
A6NHR9	High	Structural maintenance of chromosomes flexible hinge domain-containing protein 1 OS=Homo sapiens OX=9606 GN=SMCHD1 PE=1 SV=2	14	18	22	18	2005	226.2	7.3
Q9H6R4	High	Nucleolar protein 6 OS=Homo sapiens OX=9606 GN=NOL6 PE=1 SV=2	22	13	18	13	1146	127.5	7.64
O43818	High	U3 small nucleolar RNA-interacting protein 2 OS=Homo sapiens OX=9606 GN=RRP9 PE=1 SV=1	34	9	15	9	475	51.8	7.85
Q14696	High	LRP chaperone MESD OS=Homo sapiens OX=9606 GN=MESD PE=1 SV=2	50	9	20	9	234	26.1	7.78
O15371	High	Eukaryotic translation initiation factor 3 subunit D OS=Homo sapiens OX=9606 GN=EIF3D PE=1 SV=1	36	11	21	11	548	63.9	6.05
Q8TAQ2	High	SWI/SNF complex subunit SMARCC2 OS=Homo sapiens OX=9606 GN=SMARCC2 PE=1 SV=1	23	18	22	13	1214	132.8	5.69
P62081	High	40S ribosomal protein S7 OS=Homo sapiens OX=9606 GN=RPS7 PE=1 SV=1	60	11	24	11	194	22.1	10.1
P25789	High	Proteasome subunit alpha type-4 OS=Homo sapiens OX=9606 GN=PSMA4 PE=1 SV=1	43	9	21	9	261	29.5	7.72
Q86UE4	High	Protein LYRIC OS=Homo sapiens OX=9606 GN=MTDH PE=1 SV=2	34	13	20	13	582	63.8	9.32
Q9BS26	High	Endoplasmic reticulum resident protein 44 OS=Homo sapiens OX=9606 GN=ERP44 PE=1 SV=1	34	13	19	12	406	46.9	5.26
O95816	High	BAG family molecular chaperone regulator 2 OS=Homo sapiens OX=9606 GN=BAG2 PE=1 SV=1	64	12	25	12	211	23.8	6.7
Q13895	High	Bystin OS=Homo sapiens OX=9606 GN=BYSL PE=1 SV=3	43	14	19	14	437	49.6	8.12
P37837	High	Transaldolase OS=Homo sapiens OX=9606 GN=TALDO1 PE=1 SV=2	41	14	25	14	337	37.5	6.81
P22570	High	NADPH:adrenodoxin oxidoreductase, mitochondrial OS=Homo sapiens OX=9606 GN=FDXR PE=1 SV=3	36	13	19	13	491	53.8	8.44
Q96RQ3	High	Methylcrotonoyl-CoA carboxylase subunit alpha, mitochondrial OS=Homo sapiens OX=9606 GN=MCCC1 PE=1 SV=3	31	13	16	13	725	80.4	7.78
Q9UHQ9	High	NADH-cytochrome b5 reductase 1 OS=Homo sapiens OX=9606 GN=CYB5R1 PE=1 SV=1	57	12	21	12	305	34.1	9.38
Q9UJ83	High	2-hydroxyacyl-CoA lyase 1 OS=Homo sapiens OX=9606 GN=HACL1 PE=1 SV=2	37	13	18	13	578	63.7	7.36
Q15061	High	WD repeat-containing protein 43 OS=Homo sapiens OX=9606 GN=WDR43 PE=1 SV=3	27	13	19	13	677	74.8	5.57
B4DR61	High	Protein transport protein Sec61 subunit alpha isoform 1 OS=Homo sapiens OX=9606 GN=SEC61A1 PE=1 SV=1	24	9	23	9	482	52.9	8.24
Q9P2R7	High	Succinate--CoA ligase [ADP-forming] subunit beta, mitochondrial OS=Homo sapiens OX=9606 GN=SUCLA2 PE=1 SV=3	36	15	22	15	463	50.3	7.42
Q9BW27	High	Nuclear pore complex protein Nup85 OS=Homo sapiens OX=9606 GN=NUP85 PE=1 SV=1	27	12	18	12	656	75	5.55
B7ZKQ9	High	SCARB1 protein OS=Homo sapiens OX=9606 GN=SCARB1 PE=1 SV=1	24	12	24	12	481	53.8	7.85
Q9ULC4	High	Malignant T-cell-amplified sequence 1 OS=Homo sapiens OX=9606 GN=MCTS1 PE=1 SV=1	64	8	16	8	181	20.5	8.82
P07093	High	Glia-derived nexin OS=Homo sapiens OX=9606 GN=SERPINE2 PE=1 SV=1	37	13	23	13	398	44	9.29
P05362	High	Intercellular adhesion molecule 1 OS=Homo sapiens OX=9606 GN=ICAM1 PE=1 SV=2	31	12	27	12	532	57.8	7.99
Q92688	High	Acidic leucine-rich nuclear phosphoprotein 32 family member B OS=Homo sapiens OX=9606 GN=ANP32B PE=1 SV=1	32	11	32	5	251	28.8	4.06
Q99567	High	Nuclear pore complex protein Nup88 OS=Homo sapiens OX=9606 GN=NUP88 PE=1 SV=2	29	13	19	13	741	83.5	5.69
P08621	High	U1 small nuclear ribonucleoprotein 70 kDa OS=Homo sapiens OX=9606 GN=SNRNP70 PE=1 SV=2	37	13	24	13	437	51.5	9.94
P53992	High	Protein transport protein Sec24C OS=Homo sapiens OX=9606 GN=SEC24C PE=1 SV=3	21	14	18	14	1094	118.2	7.06
Q9P0L0	High	Vesicle-associated membrane protein-associated protein A OS=Homo sapiens OX=9606 GN=VAPA PE=1 SV=3	57	12	28	11	249	27.9	8.62
Q5SSJ5	High	Heterochromatin protein 1-binding protein 3 OS=Homo sapiens OX=9606 GN=HP1BP3 PE=1 SV=1	29	13	21	13	553	61.2	9.67
P53999	High	Activated RNA polymerase II transcriptional coactivator p15 OS=Homo sapiens OX=9606 GN=SUB1 PE=1 SV=3	51	9	34	9	127	14.4	9.6
P54920	High	Alpha-soluble NSF attachment protein OS=Homo sapiens OX=9606 GN=NAPA PE=1 SV=3	54	13	19	13	295	33.2	5.36
P39019	High	40S ribosomal protein S19 OS=Homo sapiens OX=9606 GN=RPS19 PE=1 SV=2	49	8	32	8	145	16.1	10.32
Q96BM9	High	ADP-ribosylation factor-like protein 8A OS=Homo sapiens OX=9606 GN=ARL8A PE=1 SV=1	53	8	20	1	186	21.4	7.77
O75400	High	Pre-mRNA-processing factor 40 homolog A OS=Homo sapiens OX=9606 GN=PRPF40A PE=1 SV=2	19	15	21	15	957	108.7	7.56
Q15738	High	Sterol-4-alpha-carboxylate 3-dehydrogenase, decarboxylating OS=Homo sapiens OX=9606 GN=NSDHL PE=1 SV=2	39	11	19	11	373	41.9	8.06
Q8IWA0	High	WD repeat-containing protein 75 OS=Homo sapiens OX=9606 GN=WDR75 PE=1 SV=1	26	17	20	17	830	94.4	5.96
B3KS98	High	Eukaryotic translation initiation factor 3 subunit H OS=Homo sapiens OX=9606 GN=EIF3H PE=1 SV=1	42	12	20	12	366	41.6	7.33
P62277	High	40S ribosomal protein S13 OS=Homo sapiens OX=9606 GN=RPS13 PE=1 SV=2	42	7	40	7	151	17.2	10.54
Q9BZZ5	High	Apoptosis inhibitor 5 OS=Homo sapiens OX=9606 GN=API5 PE=1 SV=3	28	11	22	11	524	59	7.34
J3QKT4	High	Pyrroline-5-carboxylate reductase (Fragment) OS=Homo sapiens OX=9606 GN=PYCR1 PE=1 SV=1	45	7	20	1	242	25.6	6.61
P16989	High	Y-box-binding protein 3 OS=Homo sapiens OX=9606 GN=YBX3 PE=1 SV=4	29	8	23	5	372	40.1	9.77
Q2TAY7	High	WD40 repeat-containing protein SMU1 OS=Homo sapiens OX=9606 GN=SMU1 PE=1 SV=2	41	13	17	13	513	57.5	7.18
Q96EE3	High	Nucleoporin SEH1 OS=Homo sapiens OX=9606 GN=SEH1L PE=1 SV=3	52	12	18	12	360	39.6	8.09
Q13155	High	Aminoacyl tRNA synthase complex-interacting multifunctional protein 2 OS=Homo sapiens OX=9606 GN=AIMP2 PE=1 SV=2	50	9	16	9	320	35.3	8.22
Q9UG63	High	ATP-binding cassette sub-family F member 2 OS=Homo sapiens OX=9606 GN=ABCF2 PE=1 SV=2	28	14	21	14	623	71.2	7.37
Q96EY1	High	DnaJ homolog subfamily A member 3, mitochondrial OS=Homo sapiens OX=9606 GN=DNAJA3 PE=1 SV=2	32	11	25	11	480	52.5	9.26
Q8NI36	High	WD repeat-containing protein 36 OS=Homo sapiens OX=9606 GN=WDR36 PE=1 SV=1	20	13	18	13	951	105.3	7.53
Q96T76	High	MMS19 nucleotide excision repair protein homolog OS=Homo sapiens OX=9606 GN=MMS19 PE=1 SV=2	22	15	16	15	1030	113.2	6.35
Q15008	High	26S proteasome non-ATPase regulatory subunit 6 OS=Homo sapiens OX=9606 GN=PSMD6 PE=1 SV=1	39	15	20	15	389	45.5	5.62
A0A499FI31	High	Squamous cell carcinoma antigen recognized by T-cells 3 OS=Homo sapiens OX=9606 GN=SART3 PE=1 SV=1	24	17	20	17	981	111.9	5.5
Q969V3	High	Nicalin OS=Homo sapiens OX=9606 GN=NCLN PE=1 SV=2	28	12	17	6	563	62.9	6.89
Q9UGI8	High	Testin OS=Homo sapiens OX=9606 GN=TES PE=1 SV=1	36	13	18	13	421	48	7.68
O75431	High	Metaxin-2 OS=Homo sapiens OX=9606 GN=MTX2 PE=1 SV=1	50	8	16	8	263	29.7	6.29
Q9Y6N5	High	Sulfide:quinone oxidoreductase, mitochondrial OS=Homo sapiens OX=9606 GN=SQOR PE=1 SV=1	40	14	19	14	450	49.9	9.11
Q7L2E3	High	ATP-dependent RNA helicase DHX30 OS=Homo sapiens OX=9606 GN=DHX30 PE=1 SV=1	22	16	17	16	1194	133.9	8.78
O00186	High	Syntaxin-binding protein 3 OS=Homo sapiens OX=9606 GN=STXBP3 PE=1 SV=2	31	15	18	15	592	67.7	7.8
P46063	High	ATP-dependent DNA helicase Q1 OS=Homo sapiens OX=9606 GN=RECQL PE=1 SV=3	34	16	22	16	649	73.4	7.88
P52788	High	Spermine synthase OS=Homo sapiens OX=9606 GN=SMS PE=1 SV=2	51	11	18	11	366	41.2	5.02
A0A087WYR3	High	Tumor protein D54 OS=Homo sapiens OX=9606 GN=TPD52L2 PE=1 SV=1	42	10	21	10	222	23.8	6.55
P46977	High	Dolichyl-diphosphooligosaccharide--protein glycosyltransferase subunit STT3A OS=Homo sapiens OX=9606 GN=STT3A PE=1 SV=2	24	17	25	15	705	80.5	8.07
F6QDS0	High	HCG2043426, isoform CRA_b OS=Homo sapiens OX=9606 GN=hCG_2043426 PE=1 SV=1	36	14	20	1	479	54	6.3
P04179	High	Superoxide dismutase [Mn], mitochondrial OS=Homo sapiens OX=9606 GN=SOD2 PE=1 SV=3	39	8	21	8	222	24.7	8.25
P20340	High	Ras-related protein Rab-6A OS=Homo sapiens OX=9606 GN=RAB6A PE=1 SV=3	47	8	31	7	208	23.6	5.54
O60271	High	C-Jun-amino-terminal kinase-interacting protein 4 OS=Homo sapiens OX=9606 GN=SPAG9 PE=1 SV=4	21	16	21	16	1321	146.1	5.15
Q6FI13	High	Histone H2A type 2-A OS=Homo sapiens OX=9606 GN=HIST2H2AA3 PE=1 SV=3	58	9	54	4	130	14.1	10.9
A0A087WWS1	High	THO complex subunit 1 OS=Homo sapiens OX=9606 GN=THOC1 PE=1 SV=1	32	14	18	14	657	75.6	4.98
P06756	High	Integrin alpha-V OS=Homo sapiens OX=9606 GN=ITGAV PE=1 SV=2	21	15	18	15	1048	116	5.68
O75534	High	Cold shock domain-containing protein E1 OS=Homo sapiens OX=9606 GN=CSDE1 PE=1 SV=2	24	14	19	14	798	88.8	6.25
P62318	High	Small nuclear ribonucleoprotein Sm D3 OS=Homo sapiens OX=9606 GN=SNRPD3 PE=1 SV=1	52	5	20	5	126	13.9	10.32
P42224	High	Signal transducer and activator of transcription 1-alpha/beta OS=Homo sapiens OX=9606 GN=STAT1 PE=1 SV=2	25	15	23	15	750	87.3	6.05
P47985	High	Cytochrome b-c1 complex subunit Rieske, mitochondrial OS=Homo sapiens OX=9606 GN=UQCRFS1 PE=1 SV=2	48	9	24	9	274	29.6	8.32
Q14166	High	Tubulin--tyrosine ligase-like protein 12 OS=Homo sapiens OX=9606 GN=TTLL12 PE=1 SV=2	34	15	17	15	644	74.4	5.53
O15031	High	Plexin-B2 OS=Homo sapiens OX=9606 GN=PLXNB2 PE=1 SV=3	14	14	17	14	1838	205	6.24
A0A0A0MT44	High	Filamin-B OS=Homo sapiens OX=9606 GN=FLNB PE=1 SV=1	59	9	21	1	195	20.7	8.66
Q96QD8	High	Sodium-coupled neutral amino acid transporter 2 OS=Homo sapiens OX=9606 GN=SLC38A2 PE=1 SV=2	19	6	20	6	506	56	8
J3QQ67	High	60S ribosomal protein L18 (Fragment) OS=Homo sapiens OX=9606 GN=RPL18 PE=1 SV=1	49	9	26	9	190	21.8	11.72
Q9BT78	High	COP9 signalosome complex subunit 4 OS=Homo sapiens OX=9606 GN=COPS4 PE=1 SV=1	38	10	15	10	406	46.2	5.83
P99999	High	Cytochrome c OS=Homo sapiens OX=9606 GN=CYCS PE=1 SV=2	62	8	31	8	105	11.7	9.57
H3BPE7	High	RNA-binding protein FUS OS=Homo sapiens OX=9606 GN=FUS PE=1 SV=1	16	8	27	6	527	53.5	9.36
P51610	High	Host cell factor 1 OS=Homo sapiens OX=9606 GN=HCFC1 PE=1 SV=2	14	16	20	16	2035	208.6	7.46
P26373	High	60S ribosomal protein L13 OS=Homo sapiens OX=9606 GN=RPL13 PE=1 SV=4	40	10	33	10	211	24.2	11.65
Q03135	High	Caveolin-1 OS=Homo sapiens OX=9606 GN=CAV1 PE=1 SV=4	62	10	27	10	178	20.5	6.02
Q9Y697	High	Cysteine desulfurase, mitochondrial OS=Homo sapiens OX=9606 GN=NFS1 PE=1 SV=3	42	12	19	12	457	50.2	8.31
P40616	High	ADP-ribosylation factor-like protein 1 OS=Homo sapiens OX=9606 GN=ARL1 PE=1 SV=1	64	8	18	8	181	20.4	5.72
Q13177	High	Serine/threonine-protein kinase PAK 2 OS=Homo sapiens OX=9606 GN=PAK2 PE=1 SV=3	43	16	19	16	524	58	5.96
Q53H12	High	Acylglycerol kinase, mitochondrial OS=Homo sapiens OX=9606 GN=AGK PE=1 SV=2	45	14	19	14	422	47.1	8.09
P20290	High	Transcription factor BTF3 OS=Homo sapiens OX=9606 GN=BTF3 PE=1 SV=1	58	7	17	7	206	22.2	9.38
Q99873	High	Protein arginine N-methyltransferase 1 OS=Homo sapiens OX=9606 GN=PRMT1 PE=1 SV=3	38	13	21	13	371	42.4	5.35
P51114	High	Fragile X mental retardation syndrome-related protein 1 OS=Homo sapiens OX=9606 GN=FXR1 PE=1 SV=3	32	13	17	11	621	69.7	6.15
H3BQK0	High	ATP-dependent RNA helicase DDX19B OS=Homo sapiens OX=9606 GN=DDX19B PE=1 SV=1	40	14	20	1	484	54.5	7.87
D6RB85	High	Calnexin (Fragment) OS=Homo sapiens OX=9606 GN=CANX PE=1 SV=1	49	9	32	1	144	16	4.74
P52565	High	Rho GDP-dissociation inhibitor 1 OS=Homo sapiens OX=9606 GN=ARHGDIA PE=1 SV=3	57	8	19	8	204	23.2	5.11
Q12874	High	Splicing factor 3A subunit 3 OS=Homo sapiens OX=9606 GN=SF3A3 PE=1 SV=1	32	11	18	11	501	58.8	5.38
P08779	High	Keratin, type I cytoskeletal 16 OS=Homo sapiens OX=9606 GN=KRT16 PE=1 SV=4	23	11	29	3	473	51.2	5.05
Q7L1Q6	High	Basic leucine zipper and W2 domain-containing protein 1 OS=Homo sapiens OX=9606 GN=BZW1 PE=1 SV=1	39	14	24	13	419	48	5.92
A6NFX8	High	ADP-sugar pyrophosphatase OS=Homo sapiens OX=9606 GN=NUDT5 PE=1 SV=1	54	10	16	10	232	25.9	5.19
P55327	High	Tumor protein D52 OS=Homo sapiens OX=9606 GN=TPD52 PE=1 SV=2	53	8	20	8	224	24.3	4.83
J3KPP4	High	Cisplatin resistance-associated overexpressed protein, isoform CRA_b OS=Homo sapiens OX=9606 GN=LUC7L3 PE=1 SV=1	23	11	19	11	489	58.2	9.92
A0A0G2JLB3	High	Glucosylceramidase OS=Homo sapiens OX=9606 GN=GBA PE=1 SV=1	30	9	15	9	536	59.6	7.42
A0A087WYT3	High	Prostaglandin E synthase 3 OS=Homo sapiens OX=9606 GN=PTGES3 PE=1 SV=1	49	8	27	8	164	19.1	4.55
Q5JRA6	High	Transport and Golgi organization protein 1 homolog OS=Homo sapiens OX=9606 GN=MIA3 PE=1 SV=1	14	17	17	17	1907	213.6	4.84
Q96JB5	High	CDK5 regulatory subunit-associated protein 3 OS=Homo sapiens OX=9606 GN=CDK5RAP3 PE=1 SV=2	24	10	18	10	506	56.9	4.75
Q14247	High	Src substrate cortactin OS=Homo sapiens OX=9606 GN=CTTN PE=1 SV=2	31	12	17	12	550	61.5	5.4
Q9HCU5	High	Prolactin regulatory element-binding protein OS=Homo sapiens OX=9606 GN=PREB PE=1 SV=2	36	8	13	8	417	45.4	7.88
Q9NXE4	High	Sphingomyelin phosphodiesterase 4 OS=Homo sapiens OX=9606 GN=SMPD4 PE=1 SV=3	20	13	19	12	866	97.7	8.27
P52815	High	39S ribosomal protein L12, mitochondrial OS=Homo sapiens OX=9606 GN=MRPL12 PE=1 SV=2	40	6	28	6	198	21.3	8.87
P39687	High	Acidic leucine-rich nuclear phosphoprotein 32 family member A OS=Homo sapiens OX=9606 GN=ANP32A PE=1 SV=1	29	9	26	3	249	28.6	4.09
Q9UHD1	High	Cysteine and histidine-rich domain-containing protein 1 OS=Homo sapiens OX=9606 GN=CHORDC1 PE=1 SV=2	41	11	23	11	332	37.5	7.87
O15269	High	Serine palmitoyltransferase 1 OS=Homo sapiens OX=9606 GN=SPTLC1 PE=1 SV=1	41	12	16	12	473	52.7	6.01
P28070	High	Proteasome subunit beta type-4 OS=Homo sapiens OX=9606 GN=PSMB4 PE=1 SV=4	38	5	14	5	264	29.2	5.97
Q92734	High	Protein TFG OS=Homo sapiens OX=9606 GN=TFG PE=1 SV=2	27	8	22	8	400	43.4	5.1
H3BND4	High	Pyridoxal-dependent decarboxylase domain-containing protein 1 OS=Homo sapiens OX=9606 GN=PDXDC1 PE=1 SV=1	33	13	16	13	806	88.7	5.48
P30419	High	Glycylpeptide N-tetradecanoyltransferase 1 OS=Homo sapiens OX=9606 GN=NMT1 PE=1 SV=2	42	14	19	14	496	56.8	7.8
P24844	High	Myosin regulatory light polypeptide 9 OS=Homo sapiens OX=9606 GN=MYL9 PE=1 SV=4	56	9	32	2	172	19.8	4.92
Q9UHD9	High	Ubiquilin-2 OS=Homo sapiens OX=9606 GN=UBQLN2 PE=1 SV=2	28	10	16	5	624	65.7	5.22
Q9Y383	High	Putative RNA-binding protein Luc7-like 2 OS=Homo sapiens OX=9606 GN=LUC7L2 PE=1 SV=2	31	11	19	7	392	46.5	10.01
P14550	High	Aldo-keto reductase family 1 member A1 OS=Homo sapiens OX=9606 GN=AKR1A1 PE=1 SV=3	47	11	20	10	325	36.6	6.79
P42345	High	Serine/threonine-protein kinase mTOR OS=Homo sapiens OX=9606 GN=MTOR PE=1 SV=1	10	17	17	17	2549	288.7	7.17
Q8WWQ0	High	PH-interacting protein OS=Homo sapiens OX=9606 GN=PHIP PE=1 SV=2	15	14	15	14	1821	206.6	8.85
Q9UNM6	High	26S proteasome non-ATPase regulatory subunit 13 OS=Homo sapiens OX=9606 GN=PSMD13 PE=1 SV=2	37	11	17	11	376	42.9	5.81
Q08380	High	Galectin-3-binding protein OS=Homo sapiens OX=9606 GN=LGALS3BP PE=1 SV=1	25	9	17	9	585	65.3	5.27
O75477	High	Erlin-1 OS=Homo sapiens OX=9606 GN=ERLIN1 PE=1 SV=2	45	13	27	9	348	39.1	7.87
Q8NCN5	High	Pyruvate dehydrogenase phosphatase regulatory subunit, mitochondrial OS=Homo sapiens OX=9606 GN=PDPR PE=1 SV=2	21	12	14	12	879	99.3	6.35
G3V5Z7	High	Proteasome subunit alpha type OS=Homo sapiens OX=9606 GN=PSMA6 PE=1 SV=1	47	11	21	11	252	28.1	6.76
Q14C86	High	GTPase-activating protein and VPS9 domain-containing protein 1 OS=Homo sapiens OX=9606 GN=GAPVD1 PE=1 SV=2	16	14	19	14	1478	164.9	5.22
P27144	High	Adenylate kinase 4, mitochondrial OS=Homo sapiens OX=9606 GN=AK4 PE=1 SV=1	63	10	15	10	223	25.3	8.4
P08134	High	Rho-related GTP-binding protein RhoC OS=Homo sapiens OX=9606 GN=RHOC PE=1 SV=1	65	9	23	2	193	22	6.58
Q02539	High	Histone H1.1 OS=Homo sapiens OX=9606 GN=H1-1 PE=1 SV=3	21	7	37	1	215	21.8	10.99
Q16832	High	Discoidin domain-containing receptor 2 OS=Homo sapiens OX=9606 GN=DDR2 PE=1 SV=2	24	13	20	13	855	96.7	5.36
A0A3B3IRT8	High	Translocon-associated protein subunit alpha OS=Homo sapiens OX=9606 GN=SSR1 PE=1 SV=1	29	5	26	5	288	32.4	4.48
O15143	High	Actin-related protein 2/3 complex subunit 1B OS=Homo sapiens OX=9606 GN=ARPC1B PE=1 SV=3	39	10	14	9	372	40.9	8.35
P83731	High	60S ribosomal protein L24 OS=Homo sapiens OX=9606 GN=RPL24 PE=1 SV=1	46	10	27	10	157	17.8	11.25
H7BZJ3	High	Protein disulfide-isomerase A3 (Fragment) OS=Homo sapiens OX=9606 GN=PDIA3 PE=1 SV=1	72	7	24	1	123	13.5	7.3
P13674	High	Prolyl 4-hydroxylase subunit alpha-1 OS=Homo sapiens OX=9606 GN=P4HA1 PE=1 SV=2	37	14	17	14	534	61	6.01
Q13409	High	Cytoplasmic dynein 1 intermediate chain 2 OS=Homo sapiens OX=9606 GN=DYNC1I2 PE=1 SV=3	29	10	14	5	638	71.4	5.2
Q9NWT1	High	p21-activated protein kinase-interacting protein 1 OS=Homo sapiens OX=9606 GN=PAK1IP1 PE=1 SV=2	38	11	18	11	392	43.9	8.91
P07741	High	Adenine phosphoribosyltransferase OS=Homo sapiens OX=9606 GN=APRT PE=1 SV=2	70	8	15	8	180	19.6	6.02
M0QYS1	High	60S ribosomal protein L13a (Fragment) OS=Homo sapiens OX=9606 GN=RPL13A PE=1 SV=2	34	9	32	9	210	24.2	10.86
P54727	High	UV excision repair protein RAD23 homolog B OS=Homo sapiens OX=9606 GN=RAD23B PE=1 SV=1	40	10	20	9	409	43.1	4.84
A0A0A0MRJ7	High	Coagulation factor V OS=Homo sapiens OX=9606 GN=F5 PE=1 SV=1	6	10	24	10	2229	252.1	6.05
P16144	High	Integrin beta-4 OS=Homo sapiens OX=9606 GN=ITGB4 PE=1 SV=5	12	14	16	14	1822	202	6.09
O95466	High	Formin-like protein 1 OS=Homo sapiens OX=9606 GN=FMNL1 PE=1 SV=3	19	15	18	4	1100	121.8	5.72
P29966	High	Myristoylated alanine-rich C-kinase substrate OS=Homo sapiens OX=9606 GN=MARCKS PE=1 SV=4	38	6	15	6	332	31.5	4.45
Q96IR7	High	4-hydroxyphenylpyruvate dioxygenase-like protein OS=Homo sapiens OX=9606 GN=HPDL PE=1 SV=1	55	12	18	12	371	39.4	7.03
P50579	High	Methionine aminopeptidase 2 OS=Homo sapiens OX=9606 GN=METAP2 PE=1 SV=1	34	11	15	11	478	52.9	5.82
Q8NC56	High	LEM domain-containing protein 2 OS=Homo sapiens OX=9606 GN=LEMD2 PE=1 SV=1	32	13	16	13	503	56.9	9
Q5JTZ9	High	Alanine--tRNA ligase, mitochondrial OS=Homo sapiens OX=9606 GN=AARS2 PE=1 SV=1	24	14	15	14	985	107.3	6.27
Q9Y6G9	High	Cytoplasmic dynein 1 light intermediate chain 1 OS=Homo sapiens OX=9606 GN=DYNC1LI1 PE=1 SV=3	40	13	17	12	523	56.5	6.42
Q9UBE0	High	SUMO-activating enzyme subunit 1 OS=Homo sapiens OX=9606 GN=SAE1 PE=1 SV=1	49	12	14	12	346	38.4	5.3
P50502	High	Hsc70-interacting protein OS=Homo sapiens OX=9606 GN=ST13 PE=1 SV=2	28	9	23	9	369	41.3	5.27
Q9Y276	High	Mitochondrial chaperone BCS1 OS=Homo sapiens OX=9606 GN=BCS1L PE=1 SV=1	49	12	14	12	419	47.5	8.5
P61011	High	Signal recognition particle 54 kDa protein OS=Homo sapiens OX=9606 GN=SRP54 PE=1 SV=1	35	12	17	12	504	55.7	8.75
O75489	High	NADH dehydrogenase [ubiquinone] iron-sulfur protein 3, mitochondrial OS=Homo sapiens OX=9606 GN=NDUFS3 PE=1 SV=1	41	9	18	9	264	30.2	7.5
O60502	High	Protein O-GlcNAcase OS=Homo sapiens OX=9606 GN=OGA PE=1 SV=2	24	11	15	11	916	102.8	4.91
P32004	High	Neural cell adhesion molecule L1 OS=Homo sapiens OX=9606 GN=L1CAM PE=1 SV=2	16	13	18	13	1257	139.9	6.24
Q9HAV7	High	GrpE protein homolog 1, mitochondrial OS=Homo sapiens OX=9606 GN=GRPEL1 PE=1 SV=2	49	9	20	9	217	24.3	8.12
Q15050	High	Ribosome biogenesis regulatory protein homolog OS=Homo sapiens OX=9606 GN=RRS1 PE=1 SV=2	36	12	19	12	365	41.2	10.7
Q96I24	High	Far upstream element-binding protein 3 OS=Homo sapiens OX=9606 GN=FUBP3 PE=1 SV=2	26	12	19	8	572	61.6	8.38
P0DN79	High	Cystathionine beta-synthase-like protein OS=Homo sapiens OX=9606 GN=CBSL PE=1 SV=1	25	9	14	9	551	60.5	6.65
Q99733	High	Nucleosome assembly protein 1-like 4 OS=Homo sapiens OX=9606 GN=NAP1L4 PE=1 SV=1	43	11	17	10	375	42.8	4.69
P61201	High	COP9 signalosome complex subunit 2 OS=Homo sapiens OX=9606 GN=COPS2 PE=1 SV=1	31	10	17	10	443	51.6	5.53
A0A590UJN4	High	DNA-directed RNA polymerase II subunit RPB1 OS=Homo sapiens OX=9606 GN=POLR2A PE=4 SV=1	10	12	13	12	1970	217.1	7.37
Q5VV89	High	Microsomal glutathione S-transferase 3 OS=Homo sapiens OX=9606 GN=MGST3 PE=1 SV=1	36	6	21	6	166	18.4	9.96
H7BY55	High	Complement decay-accelerating factor OS=Homo sapiens OX=9606 GN=CD55 PE=1 SV=2	34	14	25	14	550	58.9	8.78
B0I1T2	High	Unconventional myosin-Ig OS=Homo sapiens OX=9606 GN=MYO1G PE=1 SV=2	21	13	14	13	1018	116.4	8.73
Q96TA1	High	Protein Niban 2 OS=Homo sapiens OX=9606 GN=NIBAN2 PE=1 SV=3	21	10	13	10	746	84.1	6.19
P53597	High	Succinate--CoA ligase [ADP/GDP-forming] subunit alpha, mitochondrial OS=Homo sapiens OX=9606 GN=SUCLG1 PE=1 SV=4	29	8	18	8	346	36.2	8.79
H0Y742	High	SUN domain-containing protein 1 (Fragment) OS=Homo sapiens OX=9606 GN=SUN1 PE=1 SV=1	23	11	15	1	710	79.5	7.09
H0Y368	High	Dolichol-phosphate mannosyltransferase subunit 1 (Fragment) OS=Homo sapiens OX=9606 GN=DPM1 PE=1 SV=1	49	11	15	11	295	33.3	9.14
O95292	High	Vesicle-associated membrane protein-associated protein B/C OS=Homo sapiens OX=9606 GN=VAPB PE=1 SV=3	49	11	22	10	243	27.2	7.3
Q07954	High	Prolow-density lipoprotein receptor-related protein 1 OS=Homo sapiens OX=9606 GN=LRP1 PE=1 SV=2	5	17	18	17	4544	504.3	5.39
Q8NBQ5	High	Estradiol 17-beta-dehydrogenase 11 OS=Homo sapiens OX=9606 GN=HSD17B11 PE=1 SV=3	43	9	13	9	300	32.9	9.07
Q9GZS3	High	WD repeat-containing protein 61 OS=Homo sapiens OX=9606 GN=WDR61 PE=1 SV=1	48	10	14	10	305	33.6	5.47
Q15287	High	RNA-binding protein with serine-rich domain 1 OS=Homo sapiens OX=9606 GN=RNPS1 PE=1 SV=1	23	5	19	5	305	34.2	11.84
Q5VZK9	High	F-actin-uncapping protein LRRC16A OS=Homo sapiens OX=9606 GN=CARMIL1 PE=1 SV=1	18	16	17	16	1371	151.5	7.85
P11234	High	Ras-related protein Ral-B OS=Homo sapiens OX=9606 GN=RALB PE=1 SV=1	43	7	13	3	206	23.4	6.62
Q6PI48	High	Aspartate--tRNA ligase, mitochondrial OS=Homo sapiens OX=9606 GN=DARS2 PE=1 SV=1	20	10	18	10	645	73.5	8.02
Q15003	High	Condensin complex subunit 2 OS=Homo sapiens OX=9606 GN=NCAPH PE=1 SV=3	32	12	14	12	741	82.5	5.06
Q7L2H7	High	Eukaryotic translation initiation factor 3 subunit M OS=Homo sapiens OX=9606 GN=EIF3M PE=1 SV=1	38	11	18	11	374	42.5	5.63
P46783	High	40S ribosomal protein S10 OS=Homo sapiens OX=9606 GN=RPS10 PE=1 SV=1	47	9	49	8	165	18.9	10.15
P02768	High	Serum albumin OS=Homo sapiens OX=9606 GN=ALB PE=1 SV=2	10	7	53	7	609	69.3	6.28
Q9HAV4	High	Exportin-5 OS=Homo sapiens OX=9606 GN=XPO5 PE=1 SV=1	21	16	16	16	1204	136.2	5.8
Q9HB71	High	Calcyclin-binding protein OS=Homo sapiens OX=9606 GN=CACYBP PE=1 SV=2	54	10	18	9	228	26.2	8.25
Q8IVT2	High	Mitotic interactor and substrate of PLK1 OS=Homo sapiens OX=9606 GN=MISP PE=1 SV=1	26	13	16	13	679	75.3	6.83
C9JRZ6	High	MICOS complex subunit OS=Homo sapiens OX=9606 GN=CHCHD3 PE=1 SV=2	45	9	22	9	232	26.7	7.75
Q9NR28	High	Diablo homolog, mitochondrial OS=Homo sapiens OX=9606 GN=DIABLO PE=1 SV=1	49	9	15	9	239	27.1	5.9
Q14789	High	Golgin subfamily B member 1 OS=Homo sapiens OX=9606 GN=GOLGB1 PE=1 SV=2	9	18	18	18	3259	375.8	5
O00469	High	Procollagen-lysine,2-oxoglutarate 5-dioxygenase 2 OS=Homo sapiens OX=9606 GN=PLOD2 PE=1 SV=2	19	11	18	11	737	84.6	6.71
O43681	High	ATPase ASNA1 OS=Homo sapiens OX=9606 GN=ASNA1 PE=1 SV=2	44	10	19	10	348	38.8	4.91
Q9HAV0	High	Guanine nucleotide-binding protein subunit beta-4 OS=Homo sapiens OX=9606 GN=GNB4 PE=1 SV=3	49	10	18	5	340	37.5	6
P43034	High	Platelet-activating factor acetylhydrolase IB subunit alpha OS=Homo sapiens OX=9606 GN=PAFAH1B1 PE=1 SV=2	36	12	19	11	410	46.6	7.37
P49755	High	Transmembrane emp24 domain-containing protein 10 OS=Homo sapiens OX=9606 GN=TMED10 PE=1 SV=2	35	7	22	7	219	25	7.44
A0A0J9YXF2	High	Paraoxonase 2, isoform CRA_a OS=Homo sapiens OX=9606 GN=PON2 PE=1 SV=1	45	8	24	8	375	41.5	5.72
P51116	High	Fragile X mental retardation syndrome-related protein 2 OS=Homo sapiens OX=9606 GN=FXR2 PE=1 SV=2	27	11	15	8	673	74.2	6.23
P48960	High	CD97 antigen OS=Homo sapiens OX=9606 GN=CD97 PE=1 SV=4	18	11	19	11	835	91.8	6.87
P06703	High	Protein S100-A6 OS=Homo sapiens OX=9606 GN=S100A6 PE=1 SV=1	66	8	22	8	90	10.2	5.48
O15213	High	WD repeat-containing protein 46 OS=Homo sapiens OX=9606 GN=WDR46 PE=1 SV=3	26	9	12	3	610	68	9.67
Q9Y4G6	High	Talin-2 OS=Homo sapiens OX=9606 GN=TLN2 PE=1 SV=4	8	14	18	7	2542	271.4	5.57
Q04760	High	Lactoylglutathione lyase OS=Homo sapiens OX=9606 GN=GLO1 PE=1 SV=4	47	7	18	7	184	20.8	5.31
Q9UL25	High	Ras-related protein Rab-21 OS=Homo sapiens OX=9606 GN=RAB21 PE=1 SV=3	47	8	17	8	225	24.3	7.94
Q15833	High	Syntaxin-binding protein 2 OS=Homo sapiens OX=9606 GN=STXBP2 PE=1 SV=2	29	12	13	12	593	66.4	6.55
Q14258	High	E3 ubiquitin/ISG15 ligase TRIM25 OS=Homo sapiens OX=9606 GN=TRIM25 PE=1 SV=2	30	14	23	14	630	70.9	8.09
P16070	High	CD44 antigen OS=Homo sapiens OX=9606 GN=CD44 PE=1 SV=3	13	8	27	8	742	81.5	5.33
P05386	High	60S acidic ribosomal protein P1 OS=Homo sapiens OX=9606 GN=RPLP1 PE=1 SV=1	72	4	22	3	114	11.5	4.32
P15586	High	N-acetylglucosamine-6-sulfatase OS=Homo sapiens OX=9606 GN=GNS PE=1 SV=3	22	9	17	9	552	62	8.31
O43684	High	Mitotic checkpoint protein BUB3 OS=Homo sapiens OX=9606 GN=BUB3 PE=1 SV=1	47	11	17	11	328	37.1	6.84
Q04837	High	Single-stranded DNA-binding protein, mitochondrial OS=Homo sapiens OX=9606 GN=SSBP1 PE=1 SV=1	57	8	26	8	148	17.2	9.6
O43865	High	S-adenosylhomocysteine hydrolase-like protein 1 OS=Homo sapiens OX=9606 GN=AHCYL1 PE=1 SV=2	25	12	22	11	530	58.9	6.89
O43747	High	AP-1 complex subunit gamma-1 OS=Homo sapiens OX=9606 GN=AP1G1 PE=1 SV=5	23	12	14	12	822	91.3	6.8
P25325	High	3-mercaptopyruvate sulfurtransferase OS=Homo sapiens OX=9606 GN=MPST PE=1 SV=3	46	8	13	8	297	33.2	6.6
O60216	High	Double-strand-break repair protein rad21 homolog OS=Homo sapiens OX=9606 GN=RAD21 PE=1 SV=2	31	12	15	12	631	71.6	4.65
Q14676	High	Mediator of DNA damage checkpoint protein 1 OS=Homo sapiens OX=9606 GN=MDC1 PE=1 SV=3	12	14	18	14	2089	226.5	5.47
Q9Y2B0	High	Protein canopy homolog 2 OS=Homo sapiens OX=9606 GN=CNPY2 PE=1 SV=1	58	8	20	8	182	20.6	4.92
P61225	High	Ras-related protein Rap-2b OS=Homo sapiens OX=9606 GN=RAP2B PE=1 SV=1	58	9	15	5	183	20.5	4.81
Q92544	High	Transmembrane 9 superfamily member 4 OS=Homo sapiens OX=9606 GN=TM9SF4 PE=1 SV=2	23	11	21	11	642	74.5	6.54
Q14192	High	Four and a half LIM domains protein 2 OS=Homo sapiens OX=9606 GN=FHL2 PE=1 SV=3	53	11	18	11	279	32.2	7.55
A0A1W2PRS1	High	Lysosome membrane protein 2 (Fragment) OS=Homo sapiens OX=9606 GN=SCARB2 PE=1 SV=1	26	11	20	11	519	58.1	5.15
P57721	High	Poly(rC)-binding protein 3 OS=Homo sapiens OX=9606 GN=PCBP3 PE=2 SV=2	20	6	26	1	371	39.4	8.07
Q8TC12	High	Retinol dehydrogenase 11 OS=Homo sapiens OX=9606 GN=RDH11 PE=1 SV=2	34	8	15	8	318	35.4	8.82
P16104	High	Histone H2AX OS=Homo sapiens OX=9606 GN=H2AFX PE=1 SV=2	38	8	37	2	143	15.1	10.74
O76094	High	Signal recognition particle subunit SRP72 OS=Homo sapiens OX=9606 GN=SRP72 PE=1 SV=3	29	13	17	13	671	74.6	9.26
P00441	High	Superoxide dismutase [Cu-Zn] OS=Homo sapiens OX=9606 GN=SOD1 PE=1 SV=2	78	8	16	8	154	15.9	6.13
A0A3B3IUB5	High	Minor histocompatibility antigen H13 OS=Homo sapiens OX=9606 GN=HM13 PE=1 SV=1	21	9	20	9	420	46.3	8.03
Q99541	High	Perilipin-2 OS=Homo sapiens OX=9606 GN=PLIN2 PE=1 SV=2	38	10	19	10	437	48	6.8
P23258	High	Tubulin gamma-1 chain OS=Homo sapiens OX=9606 GN=TUBG1 PE=1 SV=2	51	12	15	12	451	51.1	6.14
B0YIW6	High	Coatomer subunit delta OS=Homo sapiens OX=9606 GN=ARCN1 PE=1 SV=1	28	12	16	12	552	61.6	5.85
O14975	High	Very long-chain acyl-CoA synthetase OS=Homo sapiens OX=9606 GN=SLC27A2 PE=1 SV=2	32	14	15	14	620	70.3	8.51
Q7Z3B4	High	Nucleoporin p54 OS=Homo sapiens OX=9606 GN=NUP54 PE=1 SV=2	33	12	18	12	507	55.4	7.02
Q9P035	High	Very-long-chain (3R)-3-hydroxyacyl-CoA dehydratase 3 OS=Homo sapiens OX=9606 GN=HACD3 PE=1 SV=2	26	7	15	7	362	43.1	8.94
P62745	High	Rho-related GTP-binding protein RhoB OS=Homo sapiens OX=9606 GN=RHOB PE=1 SV=1	64	8	19	6	196	22.1	5.24
O75340	High	Programmed cell death protein 6 OS=Homo sapiens OX=9606 GN=PDCD6 PE=1 SV=1	50	7	28	7	191	21.9	5.4
A0A140T9S9	High	HLA class I histocompatibility antigen, B alpha chain (Fragment) OS=Homo sapiens OX=9606 GN=HLA-B PE=1 SV=1	40	6	28	1	241	26.4	6.28
P61006	High	Ras-related protein Rab-8A OS=Homo sapiens OX=9606 GN=RAB8A PE=1 SV=1	47	9	28	5	207	23.7	9.07
Q9H223	High	EH domain-containing protein 4 OS=Homo sapiens OX=9606 GN=EHD4 PE=1 SV=1	35	14	18	12	541	61.1	6.76
P60891	High	Ribose-phosphate pyrophosphokinase 1 OS=Homo sapiens OX=9606 GN=PRPS1 PE=1 SV=2	38	9	15	4	318	34.8	6.98
P60228	High	Eukaryotic translation initiation factor 3 subunit E OS=Homo sapiens OX=9606 GN=EIF3E PE=1 SV=1	29	11	17	11	445	52.2	6.04
Q5JWF2	High	Guanine nucleotide-binding protein G(s) subunit alpha isoforms XLas OS=Homo sapiens OX=9606 GN=GNAS PE=1 SV=2	11	8	16	7	1037	111	5.03
Q9H8H0	High	Nucleolar protein 11 OS=Homo sapiens OX=9606 GN=NOL11 PE=1 SV=1	26	13	17	13	719	81.1	6.07
P68036	High	Ubiquitin-conjugating enzyme E2 L3 OS=Homo sapiens OX=9606 GN=UBE2L3 PE=1 SV=1	64	6	17	6	154	17.9	8.51
P23919	High	Thymidylate kinase OS=Homo sapiens OX=9606 GN=DTYMK PE=1 SV=4	56	12	17	12	212	23.8	8.27
P25787	High	Proteasome subunit alpha type-2 OS=Homo sapiens OX=9606 GN=PSMA2 PE=1 SV=2	51	7	15	7	234	25.9	7.43
P36871	High	Phosphoglucomutase-1 OS=Homo sapiens OX=9606 GN=PGM1 PE=1 SV=3	25	13	18	13	562	61.4	6.76
E9PAV3	High	Nascent polypeptide-associated complex subunit alpha, muscle-specific form OS=Homo sapiens OX=9606 GN=NACA PE=1 SV=1	4	6	20	5	2078	205.3	9.58
Q96C36	High	Pyrroline-5-carboxylate reductase 2 OS=Homo sapiens OX=9606 GN=PYCR2 PE=1 SV=1	43	11	19	10	320	33.6	7.77
P60953	High	Cell division control protein 42 homolog OS=Homo sapiens OX=9606 GN=CDC42 PE=1 SV=2	57	8	23	8	191	21.2	6.55
Q9UHG3	High	Prenylcysteine oxidase 1 OS=Homo sapiens OX=9606 GN=PCYOX1 PE=1 SV=3	35	14	19	14	505	56.6	6.18
P52732	High	Kinesin-like protein KIF11 OS=Homo sapiens OX=9606 GN=KIF11 PE=1 SV=2	20	15	17	15	1056	119.1	5.64
O60763	High	General vesicular transport factor p115 OS=Homo sapiens OX=9606 GN=USO1 PE=1 SV=2	18	12	14	12	962	107.8	4.91
P05067	High	Amyloid-beta precursor protein OS=Homo sapiens OX=9606 GN=APP PE=1 SV=3	21	11	16	11	770	86.9	4.82
P46778	High	60S ribosomal protein L21 OS=Homo sapiens OX=9606 GN=RPL21 PE=1 SV=2	42	9	20	9	160	18.6	10.49
Q5T6V5	High	Queuosine salvage protein OS=Homo sapiens OX=9606 GN=C9orf64 PE=1 SV=1	41	12	17	12	341	39	5.88
Q14764	High	Major vault protein OS=Homo sapiens OX=9606 GN=MVP PE=1 SV=4	21	14	14	14	893	99.3	5.48
A8K878	High	Mesencephalic astrocyte-derived neurotrophic factor OS=Homo sapiens OX=9606 GN=MANF PE=1 SV=1	46	8	21	8	185	21.1	8.92
F8W727	High	60S ribosomal protein L32 OS=Homo sapiens OX=9606 GN=RPL32 PE=1 SV=1	39	7	24	7	153	18	10.59
Q13523	High	Serine/threonine-protein kinase PRP4 homolog OS=Homo sapiens OX=9606 GN=PRPF4B PE=1 SV=3	18	15	17	15	1007	116.9	10.26
Q8NE86	High	Calcium uniporter protein, mitochondrial OS=Homo sapiens OX=9606 GN=MCU PE=1 SV=1	28	10	17	10	351	39.8	8.65
Q5T0R9	High	Adenylyl cyclase-associated protein 1 (Fragment) OS=Homo sapiens OX=9606 GN=CAP1 PE=1 SV=8	33	7	19	1	262	28.6	7.49
P29590	High	Protein PML OS=Homo sapiens OX=9606 GN=PML PE=1 SV=3	22	15	20	15	882	97.5	6.21
Q96AB3	High	Isochorismatase domain-containing protein 2 OS=Homo sapiens OX=9606 GN=ISOC2 PE=1 SV=1	81	8	11	8	205	22.3	7.77
Q96AQ6	High	Pre-B-cell leukemia transcription factor-interacting protein 1 OS=Homo sapiens OX=9606 GN=PBXIP1 PE=1 SV=1	21	11	15	11	731	80.6	5.33
P09012	High	U1 small nuclear ribonucleoprotein A OS=Homo sapiens OX=9606 GN=SNRPA PE=1 SV=3	33	8	17	6	282	31.3	9.83
O60287	High	Nucleolar pre-ribosomal-associated protein 1 OS=Homo sapiens OX=9606 GN=URB1 PE=1 SV=4	11	16	16	16	2271	254.2	6.47
Q99436	High	Proteasome subunit beta type-7 OS=Homo sapiens OX=9606 GN=PSMB7 PE=1 SV=1	39	7	18	7	277	29.9	7.68
O15027	High	Protein transport protein Sec16A OS=Homo sapiens OX=9606 GN=SEC16A PE=1 SV=4	12	16	17	16	2357	251.7	5.8
Q92542	High	Nicastrin OS=Homo sapiens OX=9606 GN=NCSTN PE=1 SV=2	18	9	15	9	709	78.4	5.99
O15355	High	Protein phosphatase 1G OS=Homo sapiens OX=9606 GN=PPM1G PE=1 SV=1	27	8	15	8	546	59.2	4.36
P32320	High	Cytidine deaminase OS=Homo sapiens OX=9606 GN=CDA PE=1 SV=2	60	5	18	5	146	16.2	6.92
Q9NVI1	High	Fanconi anemia group I protein OS=Homo sapiens OX=9606 GN=FANCI PE=1 SV=4	16	15	16	15	1328	149.2	6.74
P08243	High	Asparagine synthetase [glutamine-hydrolyzing] OS=Homo sapiens OX=9606 GN=ASNS PE=1 SV=4	27	11	16	11	561	64.3	6.86
Q9UKY7	High	Protein CDV3 homolog OS=Homo sapiens OX=9606 GN=CDV3 PE=1 SV=1	69	8	18	8	258	27.3	6.4
Q92922	High	SWI/SNF complex subunit SMARCC1 OS=Homo sapiens OX=9606 GN=SMARCC1 PE=1 SV=3	17	11	14	6	1105	122.8	5.76
O60888	High	Protein CutA OS=Homo sapiens OX=9606 GN=CUTA PE=1 SV=2	49	6	14	6	179	19.1	5.5
Q13185	High	Chromobox protein homolog 3 OS=Homo sapiens OX=9606 GN=CBX3 PE=1 SV=4	58	8	16	6	183	20.8	5.33
O95340	High	Bifunctional 3'-phosphoadenosine 5'-phosphosulfate synthase 2 OS=Homo sapiens OX=9606 GN=PAPSS2 PE=1 SV=2	27	12	15	11	614	69.5	8.03
Q10570	High	Cleavage and polyadenylation specificity factor subunit 1 OS=Homo sapiens OX=9606 GN=CPSF1 PE=1 SV=2	13	12	13	12	1443	160.8	6.4
P53634	High	Dipeptidyl peptidase 1 OS=Homo sapiens OX=9606 GN=CTSC PE=1 SV=2	38	11	16	11	463	51.8	6.99
P49662	High	Caspase-4 OS=Homo sapiens OX=9606 GN=CASP4 PE=1 SV=1	43	12	17	12	377	43.2	6
Q7Z4V5	High	Hepatoma-derived growth factor-related protein 2 OS=Homo sapiens OX=9606 GN=HDGFL2 PE=1 SV=1	20	10	14	9	671	74.3	7.49
Q9Y2U8	High	Inner nuclear membrane protein Man1 OS=Homo sapiens OX=9606 GN=LEMD3 PE=1 SV=2	24	13	16	13	911	99.9	7.55
Q9H7B2	High	Ribosome production factor 2 homolog OS=Homo sapiens OX=9606 GN=RPF2 PE=1 SV=2	38	10	14	10	306	35.6	9.99
A0A2R8YD14	High	40S ribosomal protein S24 OS=Homo sapiens OX=9606 GN=RPS24 PE=1 SV=1	28	5	17	5	165	19.2	10.98
K7ELC2	High	40S ribosomal protein S15 OS=Homo sapiens OX=9606 GN=RPS15 PE=1 SV=1	36	4	17	4	152	17.7	10.39
P09543	High	2',3'-cyclic-nucleotide 3'-phosphodiesterase OS=Homo sapiens OX=9606 GN=CNP PE=1 SV=2	39	13	18	13	421	47.5	9.07
P37198	High	Nuclear pore glycoprotein p62 OS=Homo sapiens OX=9606 GN=NUP62 PE=1 SV=3	19	8	18	8	522	53.2	5.31
P26196	High	Probable ATP-dependent RNA helicase DDX6 OS=Homo sapiens OX=9606 GN=DDX6 PE=1 SV=2	37	12	15	12	483	54.4	8.66
Q8TBC4	High	NEDD8-activating enzyme E1 catalytic subunit OS=Homo sapiens OX=9606 GN=UBA3 PE=1 SV=2	33	9	14	9	463	51.8	5.45
P12532	High	Creatine kinase U-type, mitochondrial OS=Homo sapiens OX=9606 GN=CKMT1A PE=1 SV=1	38	8	14	8	417	47	8.34
Q9H078	High	Caseinolytic peptidase B protein homolog OS=Homo sapiens OX=9606 GN=CLPB PE=1 SV=1	22	12	14	5	707	78.7	9.01
Q8IWJ2	High	GRIP and coiled-coil domain-containing protein 2 OS=Homo sapiens OX=9606 GN=GCC2 PE=1 SV=4	14	14	15	14	1684	195.8	5.14
P63151	High	Serine/threonine-protein phosphatase 2A 55 kDa regulatory subunit B alpha isoform OS=Homo sapiens OX=9606 GN=PPP2R2A PE=1 SV=1	33	10	15	10	447	51.7	6.2
Q14232	High	Translation initiation factor eIF-2B subunit alpha OS=Homo sapiens OX=9606 GN=EIF2B1 PE=1 SV=1	50	11	14	11	305	33.7	7.33
P35268	High	60S ribosomal protein L22 OS=Homo sapiens OX=9606 GN=RPL22 PE=1 SV=2	55	5	16	5	128	14.8	9.19
Q7L576	High	Cytoplasmic FMR1-interacting protein 1 OS=Homo sapiens OX=9606 GN=CYFIP1 PE=1 SV=1	15	15	16	15	1253	145.1	6.9
Q08257	High	Quinone oxidoreductase OS=Homo sapiens OX=9606 GN=CRYZ PE=1 SV=1	56	12	13	12	329	35.2	8.44
P62316	High	Small nuclear ribonucleoprotein Sm D2 OS=Homo sapiens OX=9606 GN=SNRPD2 PE=1 SV=1	55	7	26	7	118	13.5	9.91
P0CG39	High	POTE ankyrin domain family member J OS=Homo sapiens OX=9606 GN=POTEJ PE=3 SV=1	5	4	40	1	1038	117.3	5.97
Q9Y2L1	High	Exosome complex exonuclease RRP44 OS=Homo sapiens OX=9606 GN=DIS3 PE=1 SV=2	18	11	16	11	958	108.9	7.14
Q6PKG0	High	La-related protein 1 OS=Homo sapiens OX=9606 GN=LARP1 PE=1 SV=2	17	11	15	11	1096	123.4	8.82
Q15654	High	Thyroid receptor-interacting protein 6 OS=Homo sapiens OX=9606 GN=TRIP6 PE=1 SV=3	46	11	15	11	476	50.3	7.37
P11908	High	Ribose-phosphate pyrophosphokinase 2 OS=Homo sapiens OX=9606 GN=PRPS2 PE=1 SV=2	36	8	14	3	318	34.7	6.61
F5GZG1	High	Ras-related protein Rap-1b (Fragment) OS=Homo sapiens OX=9606 GN=RAP1B PE=1 SV=8	47	5	12	1	121	13.8	4.94
P56182	High	Ribosomal RNA processing protein 1 homolog A OS=Homo sapiens OX=9606 GN=RRP1 PE=1 SV=1	31	13	19	13	461	52.8	9.33
Q9P2R3	High	Rabankyrin-5 OS=Homo sapiens OX=9606 GN=ANKFY1 PE=1 SV=2	18	13	15	13	1169	128.3	6.1
Q15056	High	Eukaryotic translation initiation factor 4H OS=Homo sapiens OX=9606 GN=EIF4H PE=1 SV=5	33	6	23	6	248	27.4	7.23
P61088	High	Ubiquitin-conjugating enzyme E2 N OS=Homo sapiens OX=9606 GN=UBE2N PE=1 SV=1	72	8	18	4	152	17.1	6.57
O43752	High	Syntaxin-6 OS=Homo sapiens OX=9606 GN=STX6 PE=1 SV=1	45	8	14	7	255	29.2	4.93
O75821	High	Eukaryotic translation initiation factor 3 subunit G OS=Homo sapiens OX=9606 GN=EIF3G PE=1 SV=2	31	8	19	1	320	35.6	6.13
H0Y4R4	High	Torsin-1A-interacting protein 1 (Fragment) OS=Homo sapiens OX=9606 GN=TOR1AIP1 PE=1 SV=1	44	10	15	1	296	33.7	7.97
P61163	High	Alpha-centractin OS=Homo sapiens OX=9606 GN=ACTR1A PE=1 SV=1	38	9	14	6	376	42.6	6.64
O00505	High	Importin subunit alpha-4 OS=Homo sapiens OX=9606 GN=KPNA3 PE=1 SV=2	33	10	15	7	521	57.8	4.94
Q9NZI8	High	Insulin-like growth factor 2 mRNA-binding protein 1 OS=Homo sapiens OX=9606 GN=IGF2BP1 PE=1 SV=2	29	14	17	13	577	63.4	9.2
Q02818	High	Nucleobindin-1 OS=Homo sapiens OX=9606 GN=NUCB1 PE=1 SV=4	35	12	14	12	461	53.8	5.25
Q96HS1	High	Serine/threonine-protein phosphatase PGAM5, mitochondrial OS=Homo sapiens OX=9606 GN=PGAM5 PE=1 SV=2	40	10	16	10	289	32	8.68
Q5UIP0	High	Telomere-associated protein RIF1 OS=Homo sapiens OX=9606 GN=RIF1 PE=1 SV=2	7	11	15	11	2472	274.3	5.52
P31937	High	3-hydroxyisobutyrate dehydrogenase, mitochondrial OS=Homo sapiens OX=9606 GN=HIBADH PE=1 SV=2	28	6	15	6	336	35.3	8.13
Q9HD20	High	Manganese-transporting ATPase 13A1 OS=Homo sapiens OX=9606 GN=ATP13A1 PE=1 SV=2	16	12	14	12	1204	132.9	8.13
Q7Z417	High	Nuclear fragile X mental retardation-interacting protein 2 OS=Homo sapiens OX=9606 GN=NUFIP2 PE=1 SV=1	29	12	13	12	695	76.1	8.7
Q9UBV2	High	Protein sel-1 homolog 1 OS=Homo sapiens OX=9606 GN=SEL1L PE=1 SV=3	18	8	12	8	794	88.7	5.39
Q9NNW7	High	Thioredoxin reductase 2, mitochondrial OS=Homo sapiens OX=9606 GN=TXNRD2 PE=1 SV=3	39	11	16	10	524	56.5	7.5
P04908	High	Histone H2A type 1-B/E OS=Homo sapiens OX=9606 GN=H2AC4 PE=1 SV=2	35	7	52	2	130	14.1	11.05
Q9H7Z7	High	Prostaglandin E synthase 2 OS=Homo sapiens OX=9606 GN=PTGES2 PE=1 SV=1	33	9	15	9	377	41.9	9.16
P55735	High	Protein SEC13 homolog OS=Homo sapiens OX=9606 GN=SEC13 PE=1 SV=3	41	8	16	8	322	35.5	5.48
Q9NPJ3	High	Acyl-coenzyme A thioesterase 13 OS=Homo sapiens OX=9606 GN=ACOT13 PE=1 SV=1	62	5	14	5	140	15	9.14
O00425	High	Insulin-like growth factor 2 mRNA-binding protein 3 OS=Homo sapiens OX=9606 GN=IGF2BP3 PE=1 SV=2	30	14	15	13	579	63.7	8.87
Q9P265	High	Disco-interacting protein 2 homolog B OS=Homo sapiens OX=9606 GN=DIP2B PE=1 SV=3	11	12	13	12	1576	171.4	8.09
H7C1M2	High	Protein SON (Fragment) OS=Homo sapiens OX=9606 GN=SON PE=1 SV=1	17	13	16	1	1454	159.9	9.13
P20674	High	Cytochrome c oxidase subunit 5A, mitochondrial OS=Homo sapiens OX=9606 GN=COX5A PE=1 SV=2	52	7	17	7	150	16.8	6.79
Q9Y3Y2	High	Chromatin target of PRMT1 protein OS=Homo sapiens OX=9606 GN=CHTOP PE=1 SV=2	29	5	16	5	248	26.4	12.23
H3BP20	High	Beta-hexosaminidase OS=Homo sapiens OX=9606 GN=HEXA PE=1 SV=1	25	11	17	10	540	62	5.21
E9PL71	High	Elongation factor 1-delta (Fragment) OS=Homo sapiens OX=9606 GN=EEF1D PE=1 SV=1	58	8	19	1	187	20.8	5.01
Q9UBB4	High	Ataxin-10 OS=Homo sapiens OX=9606 GN=ATXN10 PE=1 SV=1	34	12	16	12	475	53.5	5.25
O94973	High	AP-2 complex subunit alpha-2 OS=Homo sapiens OX=9606 GN=AP2A2 PE=1 SV=2	18	10	12	8	939	103.9	6.96
Q13637	High	Ras-related protein Rab-32 OS=Homo sapiens OX=9606 GN=RAB32 PE=1 SV=3	51	10	17	9	225	25	6.54
P30043	High	Flavin reductase (NADPH) OS=Homo sapiens OX=9606 GN=BLVRB PE=1 SV=3	54	7	17	7	206	22.1	7.65
H0Y626	High	Uncharacterized protein OS=Homo sapiens OX=9606 PE=4 SV=2	18	12	16	12	953	107.9	7.25
A0A0A0MRM8	High	Unconventional myosin-VI OS=Homo sapiens OX=9606 GN=MYO6 PE=1 SV=1	15	14	15	14	1253	144.9	8.56
Q9H5Q4	High	Dimethyladenosine transferase 2, mitochondrial OS=Homo sapiens OX=9606 GN=TFB2M PE=1 SV=1	32	12	17	12	396	45.3	9.19
Q8WUD1	High	Ras-related protein Rab-2B OS=Homo sapiens OX=9606 GN=RAB2B PE=1 SV=1	47	8	15	1	216	24.2	7.83
P55036	High	26S proteasome non-ATPase regulatory subunit 4 OS=Homo sapiens OX=9606 GN=PSMD4 PE=1 SV=1	31	7	14	1	377	40.7	4.79
P30405	High	Peptidyl-prolyl cis-trans isomerase F, mitochondrial OS=Homo sapiens OX=9606 GN=PPIF PE=1 SV=1	38	9	21	8	207	22	9.38
Q13769	High	THO complex subunit 5 homolog OS=Homo sapiens OX=9606 GN=THOC5 PE=1 SV=2	26	12	14	12	683	78.5	6.87
Q3ZCQ8	High	Mitochondrial import inner membrane translocase subunit TIM50 OS=Homo sapiens OX=9606 GN=TIMM50 PE=1 SV=2	27	8	17	8	353	39.6	8.37
Q29RF7	High	Sister chromatid cohesion protein PDS5 homolog A OS=Homo sapiens OX=9606 GN=PDS5A PE=1 SV=1	14	12	16	10	1337	150.7	7.91
Q70UQ0	High	Inhibitor of nuclear factor kappa-B kinase-interacting protein OS=Homo sapiens OX=9606 GN=IKBIP PE=1 SV=1	31	10	15	10	350	39.3	9.17
Q16795	High	NADH dehydrogenase [ubiquinone] 1 alpha subcomplex subunit 9, mitochondrial OS=Homo sapiens OX=9606 GN=NDUFA9 PE=1 SV=2	32	9	17	9	377	42.5	9.8
A0A1W2PNP0	High	GPI transamidase component PIG-T (Fragment) OS=Homo sapiens OX=9606 GN=PIGT PE=1 SV=1	23	9	15	9	580	65.9	8.65
O00330	High	Pyruvate dehydrogenase protein X component, mitochondrial OS=Homo sapiens OX=9606 GN=PDHX PE=1 SV=3	29	11	16	11	501	54.1	8.66
Q15645	High	Pachytene checkpoint protein 2 homolog OS=Homo sapiens OX=9606 GN=TRIP13 PE=1 SV=2	34	12	16	12	432	48.5	6.09
B5MBZ0	High	Echinoderm microtubule-associated protein-like 4 OS=Homo sapiens OX=9606 GN=EML4 PE=1 SV=3	22	15	17	14	992	110.1	6.49
Q9UHB9	High	Signal recognition particle subunit SRP68 OS=Homo sapiens OX=9606 GN=SRP68 PE=1 SV=2	19	10	14	10	627	70.7	8.56
Q15437	High	Protein transport protein Sec23B OS=Homo sapiens OX=9606 GN=SEC23B PE=1 SV=2	23	10	13	8	767	86.4	6.89
Q5QJE6	High	Deoxynucleotidyltransferase terminal-interacting protein 2 OS=Homo sapiens OX=9606 GN=DNTTIP2 PE=1 SV=2	28	12	12	12	756	84.4	6.16
E7EWR4	High	Cleavage stimulation factor subunit 2 OS=Homo sapiens OX=9606 GN=CSTF2 PE=1 SV=1	20	8	16	4	597	62.9	6.87
B8ZZC5	High	Glutaminase kidney isoform, mitochondrial OS=Homo sapiens OX=9606 GN=GLS PE=1 SV=1	66	5	15	4	103	11.9	6.67
Q9BVK6	High	Transmembrane emp24 domain-containing protein 9 OS=Homo sapiens OX=9606 GN=TMED9 PE=1 SV=2	33	10	22	8	235	27.3	8.02
Q13561	High	Dynactin subunit 2 OS=Homo sapiens OX=9606 GN=DCTN2 PE=1 SV=4	45	11	13	11	401	44.2	5.21
P23634	High	Plasma membrane calcium-transporting ATPase 4 OS=Homo sapiens OX=9606 GN=ATP2B4 PE=1 SV=2	11	9	12	3	1241	137.8	6.6
O94776	High	Metastasis-associated protein MTA2 OS=Homo sapiens OX=9606 GN=MTA2 PE=1 SV=1	28	13	16	11	668	75	9.66
P82650	High	28S ribosomal protein S22, mitochondrial OS=Homo sapiens OX=9606 GN=MRPS22 PE=1 SV=1	31	9	13	9	360	41.3	7.9
P16949	High	Stathmin OS=Homo sapiens OX=9606 GN=STMN1 PE=1 SV=3	51	9	22	9	149	17.3	5.97
C9JQN7	High	Eukaryotic translation initiation factor 3 subunit B (Fragment) OS=Homo sapiens OX=9606 GN=EIF3B PE=1 SV=1	68	8	14	1	153	18.1	5.57
O95336	High	6-phosphogluconolactonase OS=Homo sapiens OX=9606 GN=PGLS PE=1 SV=2	59	8	15	8	258	27.5	6.05
O00458	High	Interferon-related developmental regulator 1 OS=Homo sapiens OX=9606 GN=IFRD1 PE=1 SV=4	31	8	10	8	451	50.2	7.18
Q92522	High	Histone H1x OS=Homo sapiens OX=9606 GN=H1FX PE=1 SV=1	30	6	16	6	213	22.5	10.76
P49773	High	Histidine triad nucleotide-binding protein 1 OS=Homo sapiens OX=9606 GN=HINT1 PE=1 SV=2	73	8	13	8	126	13.8	6.95
Q8IUE6	High	Histone H2A type 2-B OS=Homo sapiens OX=9606 GN=HIST2H2AB PE=1 SV=3	42	6	30	2	130	14	10.89
Q8NFH3	High	Nucleoporin Nup43 OS=Homo sapiens OX=9606 GN=NUP43 PE=1 SV=1	27	7	13	7	380	42.1	5.63
Q99961	High	Endophilin-A2 OS=Homo sapiens OX=9606 GN=SH3GL1 PE=1 SV=1	42	12	17	12	368	41.5	5.43
Q9UNF1	High	Melanoma-associated antigen D2 OS=Homo sapiens OX=9606 GN=MAGED2 PE=1 SV=2	29	10	14	10	606	64.9	9.32
Q9Y6D5	High	Brefeldin A-inhibited guanine nucleotide-exchange protein 2 OS=Homo sapiens OX=9606 GN=ARFGEF2 PE=1 SV=3	13	16	17	8	1785	201.9	6.33
O43464	High	Serine protease HTRA2, mitochondrial OS=Homo sapiens OX=9606 GN=HTRA2 PE=1 SV=2	25	7	11	7	458	48.8	10.07
Q15067	High	Peroxisomal acyl-coenzyme A oxidase 1 OS=Homo sapiens OX=9606 GN=ACOX1 PE=1 SV=3	22	9	12	9	660	74.4	8.16
P36915	High	Guanine nucleotide-binding protein-like 1 OS=Homo sapiens OX=9606 GN=GNL1 PE=1 SV=2	26	11	13	11	607	68.6	5.8
Q9UBU9	High	Nuclear RNA export factor 1 OS=Homo sapiens OX=9606 GN=NXF1 PE=1 SV=1	28	11	16	11	619	70.1	8.51
Q9NZ08	High	Endoplasmic reticulum aminopeptidase 1 OS=Homo sapiens OX=9606 GN=ERAP1 PE=1 SV=3	19	15	17	15	941	107.2	6.46
P09661	High	U2 small nuclear ribonucleoprotein A' OS=Homo sapiens OX=9606 GN=SNRPA1 PE=1 SV=2	46	9	14	9	255	28.4	8.62
Q9BYT8	High	Neurolysin, mitochondrial OS=Homo sapiens OX=9606 GN=NLN PE=1 SV=1	23	12	13	12	704	80.6	6.64
Q5TEC6	High	Histone H3 OS=Homo sapiens OX=9606 GN=HIST2H3PS2 PE=1 SV=1	54	9	33	2	136	15.4	11.27
Q4G0N4	High	NAD kinase 2, mitochondrial OS=Homo sapiens OX=9606 GN=NADK2 PE=1 SV=2	33	10	14	10	442	49.4	8.18
Q9UM00	High	Calcium load-activated calcium channel OS=Homo sapiens OX=9606 GN=TMCO1 PE=1 SV=2	23	7	20	7	239	27.1	10.26
P50914	High	60S ribosomal protein L14 OS=Homo sapiens OX=9606 GN=RPL14 PE=1 SV=4	24	5	20	5	215	23.4	10.93
Q6PJT7	High	Zinc finger CCCH domain-containing protein 14 OS=Homo sapiens OX=9606 GN=ZC3H14 PE=1 SV=1	25	10	12	5	736	82.8	7.31
Q16576	High	Histone-binding protein RBBP7 OS=Homo sapiens OX=9606 GN=RBBP7 PE=1 SV=1	35	9	17	6	425	47.8	5.05
Q96DB5	High	Regulator of microtubule dynamics protein 1 OS=Homo sapiens OX=9606 GN=RMDN1 PE=1 SV=1	29	8	15	8	314	35.8	8.5
Q99661	High	Kinesin-like protein KIF2C OS=Homo sapiens OX=9606 GN=KIF2C PE=1 SV=2	25	12	13	12	725	81.3	7.83
F6VRR5	High	Polymerase delta-interacting protein 3 OS=Homo sapiens OX=9606 GN=POLDIP3 PE=1 SV=1	31	9	13	9	438	48.1	9.92
Q9BUQ8	High	Probable ATP-dependent RNA helicase DDX23 OS=Homo sapiens OX=9606 GN=DDX23 PE=1 SV=3	21	14	14	14	820	95.5	9.55
Q9Y6D6	High	Brefeldin A-inhibited guanine nucleotide-exchange protein 1 OS=Homo sapiens OX=9606 GN=ARFGEF1 PE=1 SV=2	11	13	15	5	1849	208.6	5.85
Q13823	High	Nucleolar GTP-binding protein 2 OS=Homo sapiens OX=9606 GN=GNL2 PE=1 SV=1	26	14	16	14	731	83.6	9.25
Q9UBX3	High	Mitochondrial dicarboxylate carrier OS=Homo sapiens OX=9606 GN=SLC25A10 PE=1 SV=2	39	9	14	9	287	31.3	9.54
A6NDG6	High	Glycerol-3-phosphate phosphatase OS=Homo sapiens OX=9606 GN=PGP PE=1 SV=1	45	8	12	8	321	34	6.14
P04920	High	Anion exchange protein 2 OS=Homo sapiens OX=9606 GN=SLC4A2 PE=1 SV=4	16	12	15	12	1241	136.9	6.29
P11166	High	Solute carrier family 2, facilitated glucose transporter member 1 OS=Homo sapiens OX=9606 GN=SLC2A1 PE=1 SV=2	13	8	16	7	492	54	8.72
P51812	High	Ribosomal protein S6 kinase alpha-3 OS=Homo sapiens OX=9606 GN=RPS6KA3 PE=1 SV=1	25	14	15	10	740	83.7	6.89
Q6NUQ4	High	Transmembrane protein 214 OS=Homo sapiens OX=9606 GN=TMEM214 PE=1 SV=2	24	13	15	13	689	77.1	9.14
J3QK89	High	Calcium homeostasis endoplasmic reticulum protein OS=Homo sapiens OX=9606 GN=CHERP PE=1 SV=1	19	10	12	10	927	104.9	9.19
Q01780	High	Exosome component 10 OS=Homo sapiens OX=9606 GN=EXOSC10 PE=1 SV=2	25	14	15	14	885	100.8	8.46
Q9UI12	High	V-type proton ATPase subunit H OS=Homo sapiens OX=9606 GN=ATP6V1H PE=1 SV=1	34	10	12	10	483	55.8	6.48
P62899	High	60S ribosomal protein L31 OS=Homo sapiens OX=9606 GN=RPL31 PE=1 SV=1	45	6	18	6	125	14.5	10.54
P30876	High	DNA-directed RNA polymerase II subunit RPB2 OS=Homo sapiens OX=9606 GN=POLR2B PE=1 SV=1	16	14	15	14	1174	133.8	6.87
Q92979	High	Ribosomal RNA small subunit methyltransferase NEP1 OS=Homo sapiens OX=9606 GN=EMG1 PE=1 SV=4	57	9	14	9	244	26.7	9.17
P84098	High	60S ribosomal protein L19 OS=Homo sapiens OX=9606 GN=RPL19 PE=1 SV=1	38	10	22	9	196	23.5	11.47
Q6NUM9	High	All-trans-retinol 13,14-reductase OS=Homo sapiens OX=9606 GN=RETSAT PE=1 SV=2	20	9	11	9	610	66.8	8.28
O14656	High	Torsin-1A OS=Homo sapiens OX=9606 GN=TOR1A PE=1 SV=1	41	11	13	10	332	37.8	6.99
Q8TCJ2	High	Dolichyl-diphosphooligosaccharide--protein glycosyltransferase subunit STT3B OS=Homo sapiens OX=9606 GN=STT3B PE=1 SV=1	11	10	18	8	826	93.6	8.91
P63173	High	60S ribosomal protein L38 OS=Homo sapiens OX=9606 GN=RPL38 PE=1 SV=2	50	7	27	6	70	8.2	10.1
P11766	High	Alcohol dehydrogenase class-3 OS=Homo sapiens OX=9606 GN=ADH5 PE=1 SV=4	34	11	17	11	374	39.7	7.49
P17931	High	Galectin-3 OS=Homo sapiens OX=9606 GN=LGALS3 PE=1 SV=5	31	7	16	7	250	26.1	8.56
P63000	High	Ras-related C3 botulinum toxin substrate 1 OS=Homo sapiens OX=9606 GN=RAC1 PE=1 SV=1	33	7	17	4	192	21.4	8.5
D6RER5	High	Septin-11 OS=Homo sapiens OX=9606 GN=SEPTIN11 PE=1 SV=1	35	11	18	5	432	49.8	6.68
P68400	High	Casein kinase II subunit alpha OS=Homo sapiens OX=9606 GN=CSNK2A1 PE=1 SV=1	34	9	14	8	391	45.1	7.74
P19525	High	Interferon-induced, double-stranded RNA-activated protein kinase OS=Homo sapiens OX=9606 GN=EIF2AK2 PE=1 SV=2	28	11	14	11	551	62.1	8.4
Q9UKD2	High	mRNA turnover protein 4 homolog OS=Homo sapiens OX=9606 GN=MRTO4 PE=1 SV=2	41	9	16	9	239	27.5	8.29
P10768	High	S-formylglutathione hydrolase OS=Homo sapiens OX=9606 GN=ESD PE=1 SV=2	63	9	11	9	282	31.4	7.02
Q14571	High	Inositol 1,4,5-trisphosphate receptor type 2 OS=Homo sapiens OX=9606 GN=ITPR2 PE=1 SV=2	6	14	17	7	2701	307.9	6.43
Q96S52	High	GPI transamidase component PIG-S OS=Homo sapiens OX=9606 GN=PIGS PE=1 SV=3	30	11	13	11	555	61.6	6.49
P26006	High	Integrin alpha-3 OS=Homo sapiens OX=9606 GN=ITGA3 PE=1 SV=5	12	10	14	10	1051	116.5	6.77
O75844	High	CAAX prenyl protease 1 homolog OS=Homo sapiens OX=9606 GN=ZMPSTE24 PE=1 SV=2	30	13	21	13	475	54.8	7.49
Q9Y2A7	High	Nck-associated protein 1 OS=Homo sapiens OX=9606 GN=NCKAP1 PE=1 SV=1	16	12	14	12	1128	128.7	6.62
Q9Y3U8	High	60S ribosomal protein L36 OS=Homo sapiens OX=9606 GN=RPL36 PE=1 SV=3	30	5	16	5	105	12.2	11.59
O43252	High	Bifunctional 3'-phosphoadenosine 5'-phosphosulfate synthase 1 OS=Homo sapiens OX=9606 GN=PAPSS1 PE=1 SV=2	24	9	12	8	624	70.8	6.86
P07203	High	Glutathione peroxidase 1 OS=Homo sapiens OX=9606 GN=GPX1 PE=1 SV=4	57	10	14	10	203	22.1	6.55
Q9BZE1	High	39S ribosomal protein L37, mitochondrial OS=Homo sapiens OX=9606 GN=MRPL37 PE=1 SV=2	24	8	14	8	423	48.1	8.59
B4E2Q0	High	Calcium-transporting ATPase OS=Homo sapiens OX=9606 GN=ATP2C1 PE=1 SV=1	19	11	14	11	953	104.6	7.2
Q8TAT6	High	Nuclear protein localization protein 4 homolog OS=Homo sapiens OX=9606 GN=NPLOC4 PE=1 SV=3	21	9	11	9	608	68.1	6.38
O75718	High	Cartilage-associated protein OS=Homo sapiens OX=9606 GN=CRTAP PE=1 SV=1	30	10	14	10	401	46.5	5.73
O95817	High	BAG family molecular chaperone regulator 3 OS=Homo sapiens OX=9606 GN=BAG3 PE=1 SV=3	27	9	15	9	575	61.6	6.95
Q6P587	High	Acylpyruvase FAHD1, mitochondrial OS=Homo sapiens OX=9606 GN=FAHD1 PE=1 SV=2	58	8	12	8	224	24.8	7.39
P10253	High	Lysosomal alpha-glucosidase OS=Homo sapiens OX=9606 GN=GAA PE=1 SV=4	16	10	13	10	952	105.3	6
P07686	High	Beta-hexosaminidase subunit beta OS=Homo sapiens OX=9606 GN=HEXB PE=1 SV=3	28	12	19	11	556	63.1	6.76
Q9Y2S7	High	Polymerase delta-interacting protein 2 OS=Homo sapiens OX=9606 GN=POLDIP2 PE=1 SV=1	35	9	15	9	368	42	8.63
P52306	High	Rap1 GTPase-GDP dissociation stimulator 1 OS=Homo sapiens OX=9606 GN=RAP1GDS1 PE=1 SV=3	25	9	11	9	607	66.3	5.31
Q9NQR4	High	Omega-amidase NIT2 OS=Homo sapiens OX=9606 GN=NIT2 PE=1 SV=1	44	9	16	9	276	30.6	7.21
K7EL20	High	Eukaryotic translation initiation factor 3 subunit G (Fragment) OS=Homo sapiens OX=9606 GN=EIF3G PE=1 SV=8	35	8	19	1	262	29.3	5.41
Q9BQ67	High	Glutamate-rich WD repeat-containing protein 1 OS=Homo sapiens OX=9606 GN=GRWD1 PE=1 SV=1	36	8	14	8	446	49.4	4.92
Q16543	High	Hsp90 co-chaperone Cdc37 OS=Homo sapiens OX=9606 GN=CDC37 PE=1 SV=1	25	8	14	8	378	44.4	5.25
P01111	High	GTPase NRas OS=Homo sapiens OX=9606 GN=NRAS PE=1 SV=1	58	7	12	7	189	21.2	5.17
P28074	High	Proteasome subunit beta type-5 OS=Homo sapiens OX=9606 GN=PSMB5 PE=1 SV=3	37	8	11	8	263	28.5	6.92
O43169	High	Cytochrome b5 type B OS=Homo sapiens OX=9606 GN=CYB5B PE=1 SV=3	53	5	21	5	150	16.7	4.97
Q9NS69	High	Mitochondrial import receptor subunit TOM22 homolog OS=Homo sapiens OX=9606 GN=TOMM22 PE=1 SV=3	45	5	15	5	142	15.5	4.34
Q9UIJ7	High	GTP:AMP phosphotransferase AK3, mitochondrial OS=Homo sapiens OX=9606 GN=AK3 PE=1 SV=4	48	9	15	9	227	25.6	9.16
P02794	High	Ferritin heavy chain OS=Homo sapiens OX=9606 GN=FTH1 PE=1 SV=2	52	7	15	7	183	21.2	5.55
O95302	High	Peptidyl-prolyl cis-trans isomerase FKBP9 OS=Homo sapiens OX=9606 GN=FKBP9 PE=1 SV=2	21	9	15	8	570	63	5.08
P17661	High	Desmin OS=Homo sapiens OX=9606 GN=DES PE=1 SV=3	8	6	27	1	470	53.5	5.27
P35250	High	Replication factor C subunit 2 OS=Homo sapiens OX=9606 GN=RFC2 PE=1 SV=3	43	11	15	11	354	39.1	6.44
P19971	High	Thymidine phosphorylase OS=Homo sapiens OX=9606 GN=TYMP PE=1 SV=2	24	8	11	8	482	49.9	5.53
P61353	High	60S ribosomal protein L27 OS=Homo sapiens OX=9606 GN=RPL27 PE=1 SV=2	53	8	25	8	136	15.8	10.56
O75475	High	PC4 and SFRS1-interacting protein OS=Homo sapiens OX=9606 GN=PSIP1 PE=1 SV=1	27	11	16	10	530	60.1	9.13
Q14847	High	LIM and SH3 domain protein 1 OS=Homo sapiens OX=9606 GN=LASP1 PE=1 SV=2	41	10	17	10	261	29.7	7.05
J3KR44	High	Ubiquitin thioesterase OS=Homo sapiens OX=9606 GN=OTUB1 PE=1 SV=2	46	9	11	9	272	31.4	5
P45973	High	Chromobox protein homolog 5 OS=Homo sapiens OX=9606 GN=CBX5 PE=1 SV=1	52	8	16	7	191	22.2	5.86
O94808	High	Glutamine--fructose-6-phosphate aminotransferase [isomerizing] 2 OS=Homo sapiens OX=9606 GN=GFPT2 PE=1 SV=3	15	7	11	1	682	76.9	7.37
H7BY58	High	Protein-L-isoaspartate O-methyltransferase OS=Homo sapiens OX=9606 GN=PCMT1 PE=1 SV=1	43	8	15	8	286	30.3	6.73
Q15477	High	Helicase SKI2W OS=Homo sapiens OX=9606 GN=SKIV2L PE=1 SV=3	14	10	11	10	1246	137.7	6.06
P14678	High	Small nuclear ribonucleoprotein-associated proteins B and B' OS=Homo sapiens OX=9606 GN=SNRPB PE=1 SV=2	21	6	17	6	240	24.6	11.19
O00566	High	U3 small nucleolar ribonucleoprotein protein MPP10 OS=Homo sapiens OX=9606 GN=MPHOSPH10 PE=1 SV=2	23	10	13	10	681	78.8	4.86
P34896	High	Serine hydroxymethyltransferase, cytosolic OS=Homo sapiens OX=9606 GN=SHMT1 PE=1 SV=1	20	7	18	6	483	53	7.71
O43237	High	Cytoplasmic dynein 1 light intermediate chain 2 OS=Homo sapiens OX=9606 GN=DYNC1LI2 PE=1 SV=1	33	11	13	10	492	54.1	6.38
Q969X5	High	Endoplasmic reticulum-Golgi intermediate compartment protein 1 OS=Homo sapiens OX=9606 GN=ERGIC1 PE=1 SV=1	29	7	18	7	290	32.6	7.06
A0A2R8Y5A3	High	Catenin beta-1 OS=Homo sapiens OX=9606 GN=CTNNB1 PE=1 SV=1	20	10	11	6	783	85.6	5.97
A0A0A0MSV9	High	Tapasin OS=Homo sapiens OX=9606 GN=TAPBP PE=1 SV=1	28	7	14	7	504	53.9	7.08
Q8N684	High	Cleavage and polyadenylation specificity factor subunit 7 OS=Homo sapiens OX=9606 GN=CPSF7 PE=1 SV=1	21	7	12	7	471	52	8
P14324	High	Farnesyl pyrophosphate synthase OS=Homo sapiens OX=9606 GN=FDPS PE=1 SV=4	20	8	15	8	419	48.2	6.15
F8WCF6	High	Actin-related protein 2/3 complex subunit 4 OS=Homo sapiens OX=9606 GN=ARPC4-TTLL3 PE=3 SV=1	52	8	20	8	181	21	8.76
Q96C19	High	EF-hand domain-containing protein D2 OS=Homo sapiens OX=9606 GN=EFHD2 PE=1 SV=1	39	9	16	8	240	26.7	5.2
P51665	High	26S proteasome non-ATPase regulatory subunit 7 OS=Homo sapiens OX=9606 GN=PSMD7 PE=1 SV=2	40	10	14	10	324	37	6.77
Q8NF37	High	Lysophosphatidylcholine acyltransferase 1 OS=Homo sapiens OX=9606 GN=LPCAT1 PE=1 SV=2	26	9	12	9	534	59.1	6.02
P20645	High	Cation-dependent mannose-6-phosphate receptor OS=Homo sapiens OX=9606 GN=M6PR PE=1 SV=1	29	6	20	6	277	31	5.83
Q9H2W6	High	39S ribosomal protein L46, mitochondrial OS=Homo sapiens OX=9606 GN=MRPL46 PE=1 SV=1	33	8	13	8	279	31.7	7.05
Q5LJA5	High	Ubiquitin carboxyl-terminal hydrolase OS=Homo sapiens OX=9606 GN=UCHL5 PE=1 SV=1	45	9	14	1	355	40.4	5.34
Q13618	High	Cullin-3 OS=Homo sapiens OX=9606 GN=CUL3 PE=1 SV=2	20	13	17	12	768	88.9	8.48
O75436	High	Vacuolar protein sorting-associated protein 26A OS=Homo sapiens OX=9606 GN=VPS26A PE=1 SV=2	44	11	16	10	327	38.1	6.57
A0AVT1	High	Ubiquitin-like modifier-activating enzyme 6 OS=Homo sapiens OX=9606 GN=UBA6 PE=1 SV=1	14	12	13	12	1052	117.9	6.14
Q13242	High	Serine/arginine-rich splicing factor 9 OS=Homo sapiens OX=9606 GN=SRSF9 PE=1 SV=1	39	10	17	10	221	25.5	8.65
O43660	High	Pleiotropic regulator 1 OS=Homo sapiens OX=9606 GN=PLRG1 PE=1 SV=1	37	10	15	10	514	57.2	9.17
Q13439	High	Golgin subfamily A member 4 OS=Homo sapiens OX=9606 GN=GOLGA4 PE=1 SV=1	9	13	14	13	2230	261	5.39
Q5LJA9	High	Ubiquitin carboxyl-terminal hydrolase (Fragment) OS=Homo sapiens OX=9606 GN=UCHL5 PE=1 SV=1	43	9	14	1	368	41.7	5.53
Q5SY16	High	Polynucleotide 5'-hydroxyl-kinase NOL9 OS=Homo sapiens OX=9606 GN=NOL9 PE=1 SV=1	25	11	12	11	702	79.3	9.13
Q7Z2K6	High	Endoplasmic reticulum metallopeptidase 1 OS=Homo sapiens OX=9606 GN=ERMP1 PE=1 SV=2	17	9	14	9	904	100.2	7.52
A0A494C1N0	High	Peptidylprolyl isomerase OS=Homo sapiens OX=9606 GN=FKBP2 PE=1 SV=1	46	6	16	6	171	18.6	8.88
P21589	High	5'-nucleotidase OS=Homo sapiens OX=9606 GN=NT5E PE=1 SV=1	26	9	12	9	574	63.3	7.03
Q99805	High	Transmembrane 9 superfamily member 2 OS=Homo sapiens OX=9606 GN=TM9SF2 PE=1 SV=1	17	7	14	7	663	75.7	7.44
Q9BYD3	High	39S ribosomal protein L4, mitochondrial OS=Homo sapiens OX=9606 GN=MRPL4 PE=1 SV=1	45	8	10	8	311	34.9	9.72
Q9Y6D9	High	Mitotic spindle assembly checkpoint protein MAD1 OS=Homo sapiens OX=9606 GN=MAD1L1 PE=1 SV=2	19	10	14	10	718	83	5.92
Q13148	High	TAR DNA-binding protein 43 OS=Homo sapiens OX=9606 GN=TARDBP PE=1 SV=1	37	9	14	9	414	44.7	6.19
Q9Y2Q3	High	Glutathione S-transferase kappa 1 OS=Homo sapiens OX=9606 GN=GSTK1 PE=1 SV=3	53	9	15	9	226	25.5	8.41
P43007	High	Neutral amino acid transporter A OS=Homo sapiens OX=9606 GN=SLC1A4 PE=1 SV=1	21	6	12	6	532	55.7	6.25
P62995	High	Transformer-2 protein homolog beta OS=Homo sapiens OX=9606 GN=TRA2B PE=1 SV=1	27	6	15	6	288	33.6	11.25
P21127	High	Cyclin-dependent kinase 11B OS=Homo sapiens OX=9606 GN=CDK11B PE=1 SV=4	26	15	16	15	795	92.6	5.54
Q13505	High	Metaxin-1 OS=Homo sapiens OX=9606 GN=MTX1 PE=1 SV=3	26	12	14	12	466	51.4	9.79
Q02750	High	Dual specificity mitogen-activated protein kinase kinase 1 OS=Homo sapiens OX=9606 GN=MAP2K1 PE=1 SV=2	34	10	12	5	393	43.4	6.62
Q9BSH4	High	Translational activator of cytochrome c oxidase 1 OS=Homo sapiens OX=9606 GN=TACO1 PE=1 SV=1	42	8	15	8	297	32.5	8.13
Q9BZG1	High	Ras-related protein Rab-34 OS=Homo sapiens OX=9606 GN=RAB34 PE=1 SV=1	46	9	12	9	259	29	7.88
Q9ULV4	High	Coronin-1C OS=Homo sapiens OX=9606 GN=CORO1C PE=1 SV=1	26	10	15	10	474	53.2	7.08
O15042	High	U2 snRNP-associated SURP motif-containing protein OS=Homo sapiens OX=9606 GN=U2SURP PE=1 SV=2	14	10	12	1	1029	118.2	8.47
K7ER90	High	Eukaryotic translation initiation factor 3 subunit G (Fragment) OS=Homo sapiens OX=9606 GN=EIF3G PE=1 SV=1	36	7	18	1	227	25.4	5.49
P78417	High	Glutathione S-transferase omega-1 OS=Homo sapiens OX=9606 GN=GSTO1 PE=1 SV=2	51	10	18	10	241	27.5	6.6
Q16718	High	NADH dehydrogenase [ubiquinone] 1 alpha subcomplex subunit 5 OS=Homo sapiens OX=9606 GN=NDUFA5 PE=1 SV=3	67	6	11	6	116	13.5	5.99
Q96EY7	High	Pentatricopeptide repeat domain-containing protein 3, mitochondrial OS=Homo sapiens OX=9606 GN=PTCD3 PE=1 SV=3	27	11	14	11	689	78.5	6.42
Q9Y394	High	Dehydrogenase/reductase SDR family member 7 OS=Homo sapiens OX=9606 GN=DHRS7 PE=1 SV=1	34	8	12	8	339	38.3	8.32
Q96HC4	High	PDZ and LIM domain protein 5 OS=Homo sapiens OX=9606 GN=PDLIM5 PE=1 SV=5	21	10	14	10	596	63.9	8.21
Q96Q11	High	CCA tRNA nucleotidyltransferase 1, mitochondrial OS=Homo sapiens OX=9606 GN=TRNT1 PE=1 SV=2	31	11	17	11	434	50.1	8.1
Q9BQA1	High	Methylosome protein 50 OS=Homo sapiens OX=9606 GN=WDR77 PE=1 SV=1	35	7	13	7	342	36.7	5.17
A9Z1X7	High	Serine/arginine repetitive matrix protein 1 OS=Homo sapiens OX=9606 GN=SRRM1 PE=1 SV=1	11	6	11	6	913	103.3	11.85
Q86W42	High	THO complex subunit 6 homolog OS=Homo sapiens OX=9606 GN=THOC6 PE=1 SV=1	45	9	12	9	341	37.5	7.43
Q14596	High	Next to BRCA1 gene 1 protein OS=Homo sapiens OX=9606 GN=NBR1 PE=1 SV=3	25	12	12	12	966	107.3	5.12
P57088	High	Transmembrane protein 33 OS=Homo sapiens OX=9606 GN=TMEM33 PE=1 SV=2	34	8	18	8	247	28	9.7
Q14444	High	Caprin-1 OS=Homo sapiens OX=9606 GN=CAPRIN1 PE=1 SV=2	19	9	15	9	709	78.3	5.25
P51571	High	Translocon-associated protein subunit delta OS=Homo sapiens OX=9606 GN=SSR4 PE=1 SV=1	31	4	12	4	173	19	6.15
P48634	High	Protein PRRC2A OS=Homo sapiens OX=9606 GN=PRRC2A PE=1 SV=3	11	13	14	13	2157	228.7	9.45
O95140	High	Mitofusin-2 OS=Homo sapiens OX=9606 GN=MFN2 PE=1 SV=3	18	11	12	11	757	86.3	6.98
E9PKP7	High	Nucleolar transcription factor 1 OS=Homo sapiens OX=9606 GN=UBTF PE=1 SV=1	17	12	16	12	745	87.4	9.89
O00487	High	26S proteasome non-ATPase regulatory subunit 14 OS=Homo sapiens OX=9606 GN=PSMD14 PE=1 SV=1	36	5	12	5	310	34.6	6.52
Q9NX58	High	Cell growth-regulating nucleolar protein OS=Homo sapiens OX=9606 GN=LYAR PE=1 SV=2	31	8	12	8	379	43.6	9.54
Q9H2M9	High	Rab3 GTPase-activating protein non-catalytic subunit OS=Homo sapiens OX=9606 GN=RAB3GAP2 PE=1 SV=1	12	13	15	12	1393	155.9	5.62
Q5VZU9	High	Tripeptidyl-peptidase 2 OS=Homo sapiens OX=9606 GN=TPP2 PE=1 SV=1	15	13	13	13	1262	139.7	6.52
Q9NZ01	High	Very-long-chain enoyl-CoA reductase OS=Homo sapiens OX=9606 GN=TECR PE=1 SV=1	25	9	19	9	308	36	9.45
Q9HD23	High	Magnesium transporter MRS2 homolog, mitochondrial OS=Homo sapiens OX=9606 GN=MRS2 PE=1 SV=1	27	7	9	7	443	50.3	6.87
Q96ER9	High	Mitochondrial potassium channel OS=Homo sapiens OX=9606 GN=CCDC51 PE=1 SV=2	33	9	11	9	411	45.8	8.19
Q13867	High	Bleomycin hydrolase OS=Homo sapiens OX=9606 GN=BLMH PE=1 SV=1	35	12	14	12	455	52.5	6.27
Q9H9J2	High	39S ribosomal protein L44, mitochondrial OS=Homo sapiens OX=9606 GN=MRPL44 PE=1 SV=1	38	9	13	9	332	37.5	8.4
Q12873	High	Chromodomain-helicase-DNA-binding protein 3 OS=Homo sapiens OX=9606 GN=CHD3 PE=1 SV=3	9	12	13	6	2000	226.5	7.3
Q5VT52	High	Regulation of nuclear pre-mRNA domain-containing protein 2 OS=Homo sapiens OX=9606 GN=RPRD2 PE=1 SV=1	10	8	11	8	1461	155.9	7.42
Q9BY44	High	Eukaryotic translation initiation factor 2A OS=Homo sapiens OX=9606 GN=EIF2A PE=1 SV=3	26	11	12	11	585	64.9	8.87
J3KR97	High	Tubulin-specific chaperone D OS=Homo sapiens OX=9606 GN=TBCD PE=1 SV=1	11	7	9	7	1230	136.5	6.34
A0A087WYF7	High	MICOS complex subunit OS=Homo sapiens OX=9606 GN=APOOL PE=1 SV=1	52	9	12	9	268	29.2	9.45
J3KQ48	High	Peptidyl-tRNA hydrolase 2, mitochondrial OS=Homo sapiens OX=9606 GN=PTRH2 PE=1 SV=1	46	6	11	6	180	19.3	8.73
Q92905	High	COP9 signalosome complex subunit 5 OS=Homo sapiens OX=9606 GN=COPS5 PE=1 SV=4	39	8	10	8	334	37.6	6.54
P62851	High	40S ribosomal protein S25 OS=Homo sapiens OX=9606 GN=RPS25 PE=1 SV=1	30	5	22	5	125	13.7	10.11
G3V5T9	High	Cyclin-dependent kinase 2 OS=Homo sapiens OX=9606 GN=CDK2 PE=1 SV=1	44	12	15	9	346	39.2	8.62
P51153	High	Ras-related protein Rab-13 OS=Homo sapiens OX=9606 GN=RAB13 PE=1 SV=1	43	7	19	5	203	22.8	9.19
O15118	High	NPC intracellular cholesterol transporter 1 OS=Homo sapiens OX=9606 GN=NPC1 PE=1 SV=2	13	13	15	13	1278	142.1	5.36
P26440	High	Isovaleryl-CoA dehydrogenase, mitochondrial OS=Homo sapiens OX=9606 GN=IVD PE=1 SV=2	29	8	12	8	426	46.6	8.05
G3V2S9	High	SRA stem-loop-interacting RNA-binding protein, mitochondrial OS=Homo sapiens OX=9606 GN=SLIRP PE=1 SV=1	54	7	15	7	124	13.9	11.09
P22059	High	Oxysterol-binding protein 1 OS=Homo sapiens OX=9606 GN=OSBP PE=1 SV=1	18	9	12	9	807	89.4	7.3
Q9NR12	High	PDZ and LIM domain protein 7 OS=Homo sapiens OX=9606 GN=PDLIM7 PE=1 SV=1	35	10	15	10	457	49.8	8.41
Q8NB90	High	ATPase family protein 2 homolog OS=Homo sapiens OX=9606 GN=SPATA5 PE=1 SV=3	18	9	15	8	893	97.8	5.66
C9JIF9	High	Acylamino-acid-releasing enzyme OS=Homo sapiens OX=9606 GN=APEH PE=1 SV=1	29	12	14	12	737	81.6	5.54
Q9NZJ7	High	Mitochondrial carrier homolog 1 OS=Homo sapiens OX=9606 GN=MTCH1 PE=1 SV=1	35	9	14	9	389	41.5	9.32
O75607	High	Nucleoplasmin-3 OS=Homo sapiens OX=9606 GN=NPM3 PE=1 SV=3	51	6	12	6	178	19.3	4.63
Q9Y5Y2	High	Cytosolic Fe-S cluster assembly factor NUBP2 OS=Homo sapiens OX=9606 GN=NUBP2 PE=1 SV=1	42	7	11	7	271	28.8	5.83
J3KQY1	High	39S ribosomal protein L22, mitochondrial OS=Homo sapiens OX=9606 GN=MRPL22 PE=1 SV=1	31	6	12	5	232	26.5	9.74
Q9Y2T2	High	AP-3 complex subunit mu-1 OS=Homo sapiens OX=9606 GN=AP3M1 PE=1 SV=1	28	7	10	7	418	46.9	6.93
Q5VT79	High	Annexin A8-like protein 1 OS=Homo sapiens OX=9606 GN=ANXA8L1 PE=2 SV=2	31	6	9	6	327	36.9	5.78
S4R3N1	High	HSPE1-MOB4 readthrough OS=Homo sapiens OX=9606 GN=HSPE1-MOB4 PE=3 SV=1	26	6	35	2	261	29.7	6.16
A0A3B3ISG5	High	Insulin-degrading enzyme OS=Homo sapiens OX=9606 GN=IDE PE=1 SV=1	18	13	14	13	1019	117.9	6.92
P35270	High	Sepiapterin reductase OS=Homo sapiens OX=9606 GN=SPR PE=1 SV=1	35	7	12	7	261	28	8.05
Q9P0I2	High	ER membrane protein complex subunit 3 OS=Homo sapiens OX=9606 GN=EMC3 PE=1 SV=3	44	7	11	7	261	29.9	6.81
P10155	High	60 kDa SS-A/Ro ribonucleoprotein OS=Homo sapiens OX=9606 GN=RO60 PE=1 SV=2	27	11	14	11	538	60.6	8.03
Q9Y221	High	60S ribosome subunit biogenesis protein NIP7 homolog OS=Homo sapiens OX=9606 GN=NIP7 PE=1 SV=1	41	6	9	6	180	20.4	8.51
Q8NFH5	High	Nucleoporin NUP35 OS=Homo sapiens OX=9606 GN=NUP35 PE=1 SV=1	28	7	13	7	326	34.8	9.09
P40937	High	Replication factor C subunit 5 OS=Homo sapiens OX=9606 GN=RFC5 PE=1 SV=1	33	7	10	7	340	38.5	7.2
Q07960	High	Rho GTPase-activating protein 1 OS=Homo sapiens OX=9606 GN=ARHGAP1 PE=1 SV=1	33	9	11	9	439	50.4	6.29
Q01831	High	DNA repair protein complementing XP-C cells OS=Homo sapiens OX=9606 GN=XPC PE=1 SV=4	18	10	13	10	940	105.9	8.9
Q8NC42	High	E3 ubiquitin-protein ligase RNF149 OS=Homo sapiens OX=9606 GN=RNF149 PE=2 SV=2	25	6	12	6	400	43.1	6.54
P49720	High	Proteasome subunit beta type-3 OS=Homo sapiens OX=9606 GN=PSMB3 PE=1 SV=2	39	6	12	6	205	22.9	6.55
Q9NRG9	High	Aladin OS=Homo sapiens OX=9606 GN=AAAS PE=1 SV=1	28	10	16	10	546	59.5	7.5
A0A1B0GUA3	High	KIF-binding protein OS=Homo sapiens OX=9606 GN=KIFBP PE=1 SV=1	29	9	11	9	646	74.7	5.76
Q13636	High	Ras-related protein Rab-31 OS=Homo sapiens OX=9606 GN=RAB31 PE=1 SV=1	59	9	15	7	194	21.6	7.06
P07919	High	Cytochrome b-c1 complex subunit 6, mitochondrial OS=Homo sapiens OX=9606 GN=UQCRH PE=1 SV=2	67	5	14	5	91	10.7	4.44
Q8NBN3	High	Transmembrane protein 87A OS=Homo sapiens OX=9606 GN=TMEM87A PE=1 SV=3	19	8	12	8	555	63.4	6.74
J3QRU1	High	Tyrosine-protein kinase OS=Homo sapiens OX=9606 GN=YES1 PE=1 SV=1	32	11	12	7	548	61.3	6.57
O00264	High	Membrane-associated progesterone receptor component 1 OS=Homo sapiens OX=9606 GN=PGRMC1 PE=1 SV=3	47	8	18	7	195	21.7	4.7
Q14165	High	Malectin OS=Homo sapiens OX=9606 GN=MLEC PE=1 SV=1	32	7	11	7	292	32.2	5.41
Q15418	High	Ribosomal protein S6 kinase alpha-1 OS=Homo sapiens OX=9606 GN=RPS6KA1 PE=1 SV=2	23	13	14	9	735	82.7	7.83
Q9P0S9	High	Transmembrane protein 14C OS=Homo sapiens OX=9606 GN=TMEM14C PE=1 SV=1	41	2	6	2	112	11.6	9.88
Q13596	High	Sorting nexin-1 OS=Homo sapiens OX=9606 GN=SNX1 PE=1 SV=3	26	12	13	10	522	59	5.15
Q99615	High	DnaJ homolog subfamily C member 7 OS=Homo sapiens OX=9606 GN=DNAJC7 PE=1 SV=2	31	13	14	13	494	56.4	6.96
Q9Y3L5	High	Ras-related protein Rap-2c OS=Homo sapiens OX=9606 GN=RAP2C PE=1 SV=1	38	6	11	1	183	20.7	4.94
A0A0B4J2C3	High	Translationally-controlled tumor protein OS=Homo sapiens OX=9606 GN=TPT1 PE=1 SV=1	44	7	14	7	197	22.6	5.24
P63208	High	S-phase kinase-associated protein 1 OS=Homo sapiens OX=9606 GN=SKP1 PE=1 SV=2	53	6	11	6	163	18.6	4.54
Q5SRQ6	High	Casein kinase II subunit beta OS=Homo sapiens OX=9606 GN=CSNK2B PE=1 SV=2	35	6	14	6	234	26.9	5.96
P35249	High	Replication factor C subunit 4 OS=Homo sapiens OX=9606 GN=RFC4 PE=1 SV=2	38	10	14	10	363	39.7	8.02
Q6P2I3	High	Fumarylacetoacetate hydrolase domain-containing protein 2B OS=Homo sapiens OX=9606 GN=FAHD2B PE=1 SV=1	36	8	11	1	314	34.6	7.75
Q96BW9	High	Phosphatidate cytidylyltransferase, mitochondrial OS=Homo sapiens OX=9606 GN=TAMM41 PE=1 SV=2	13	4	9	4	452	51	7.94
P46776	High	60S ribosomal protein L27a OS=Homo sapiens OX=9606 GN=RPL27A PE=1 SV=2	39	7	20	7	148	16.6	11
A3KMH1	High	von Willebrand factor A domain-containing protein 8 OS=Homo sapiens OX=9606 GN=VWA8 PE=1 SV=2	9	11	11	11	1905	214.7	7.4
Q9UPQ0	High	LIM and calponin homology domains-containing protein 1 OS=Homo sapiens OX=9606 GN=LIMCH1 PE=1 SV=4	11	9	11	9	1083	121.8	6.47
Q96DG6	High	Carboxymethylenebutenolidase homolog OS=Homo sapiens OX=9606 GN=CMBL PE=1 SV=1	35	10	14	10	245	28	7.18
E9PLP8	High	Cleavage stimulation factor subunit 3 OS=Homo sapiens OX=9606 GN=CSTF3 PE=1 SV=2	19	11	13	11	749	86.2	7.65
P42696	High	RNA-binding protein 34 OS=Homo sapiens OX=9606 GN=RBM34 PE=1 SV=2	28	9	11	9	430	48.5	10.11
Q9NP92	High	39S ribosomal protein S30, mitochondrial OS=Homo sapiens OX=9606 GN=MRPS30 PE=1 SV=2	28	8	13	8	439	50.3	7.97
Q13098	High	COP9 signalosome complex subunit 1 OS=Homo sapiens OX=9606 GN=GPS1 PE=1 SV=4	23	8	12	8	491	55.5	6.74
Q9Y613	High	FH1/FH2 domain-containing protein 1 OS=Homo sapiens OX=9606 GN=FHOD1 PE=1 SV=3	16	10	11	10	1164	126.5	6.39
P61289	High	Proteasome activator complex subunit 3 OS=Homo sapiens OX=9606 GN=PSME3 PE=1 SV=1	39	9	14	9	254	29.5	5.95
E7ESZ7	High	NADH dehydrogenase [ubiquinone] 1 alpha subcomplex subunit 10, mitochondrial OS=Homo sapiens OX=9606 GN=NDUFA10 PE=1 SV=1	26	9	14	9	390	44.7	8.34
M0QWZ7	High	Serine--tRNA ligase, mitochondrial OS=Homo sapiens OX=9606 GN=SARS2 PE=1 SV=1	31	10	12	10	518	58.1	8.28
Q9BR76	High	Coronin-1B OS=Homo sapiens OX=9606 GN=CORO1B PE=1 SV=1	27	9	10	9	489	54.2	5.88
Q13868	High	Exosome complex component RRP4 OS=Homo sapiens OX=9606 GN=EXOSC2 PE=1 SV=2	40	8	9	8	293	32.8	7.5
P00492	High	Hypoxanthine-guanine phosphoribosyltransferase OS=Homo sapiens OX=9606 GN=HPRT1 PE=1 SV=2	62	11	14	11	218	24.6	6.68
Q13492	High	Phosphatidylinositol-binding clathrin assembly protein OS=Homo sapiens OX=9606 GN=PICALM PE=1 SV=2	23	8	10	8	652	70.7	7.9
O43809	High	Cleavage and polyadenylation specificity factor subunit 5 OS=Homo sapiens OX=9606 GN=NUDT21 PE=1 SV=1	38	6	10	6	227	26.2	8.82
P61769	High	Beta-2-microglobulin OS=Homo sapiens OX=9606 GN=B2M PE=1 SV=1	60	6	17	6	119	13.7	6.52
O75822	High	Eukaryotic translation initiation factor 3 subunit J OS=Homo sapiens OX=9606 GN=EIF3J PE=1 SV=2	34	10	16	10	258	29	4.83
O95571	High	Persulfide dioxygenase ETHE1, mitochondrial OS=Homo sapiens OX=9606 GN=ETHE1 PE=1 SV=2	51	8	12	8	254	27.9	6.83
Q12792	High	Twinfilin-1 OS=Homo sapiens OX=9606 GN=TWF1 PE=1 SV=3	40	9	12	9	350	40.3	6.96
Q7Z4H8	High	Protein O-glucosyltransferase 3 OS=Homo sapiens OX=9606 GN=POGLUT3 PE=1 SV=2	32	11	13	11	507	58.5	8.24
Q9UNS2	High	COP9 signalosome complex subunit 3 OS=Homo sapiens OX=9606 GN=COPS3 PE=1 SV=3	30	8	11	8	423	47.8	6.65
Q6DKI1	High	60S ribosomal protein L7-like 1 OS=Homo sapiens OX=9606 GN=RPL7L1 PE=1 SV=2	33	8	12	8	255	29.7	10.52
Q04721	High	Neurogenic locus notch homolog protein 2 OS=Homo sapiens OX=9606 GN=NOTCH2 PE=1 SV=3	8	13	13	12	2471	265.2	5.14
Q15637	High	Splicing factor 1 OS=Homo sapiens OX=9606 GN=SF1 PE=1 SV=4	23	10	16	8	639	68.3	8.98
Q9NR31	High	GTP-binding protein SAR1a OS=Homo sapiens OX=9606 GN=SAR1A PE=1 SV=1	35	6	16	3	198	22.4	6.68
Q00059	High	Transcription factor A, mitochondrial OS=Homo sapiens OX=9606 GN=TFAM PE=1 SV=1	30	9	14	9	246	29.1	9.72
Q8WUY1	High	Protein THEM6 OS=Homo sapiens OX=9606 GN=THEM6 PE=1 SV=2	41	8	12	8	208	23.9	9.55
O43172	High	U4/U6 small nuclear ribonucleoprotein Prp4 OS=Homo sapiens OX=9606 GN=PRPF4 PE=1 SV=2	29	10	12	10	522	58.4	7.42
Q86W92	High	Liprin-beta-1 OS=Homo sapiens OX=9606 GN=PPFIBP1 PE=1 SV=2	20	12	13	12	1011	114	5.55
P31153	High	S-adenosylmethionine synthase isoform type-2 OS=Homo sapiens OX=9606 GN=MAT2A PE=1 SV=1	30	9	13	9	395	43.6	6.48
Q99598	High	Translin-associated protein X OS=Homo sapiens OX=9606 GN=TSNAX PE=1 SV=1	37	7	10	7	290	33.1	6.55
Q16706	High	Alpha-mannosidase 2 OS=Homo sapiens OX=9606 GN=MAN2A1 PE=1 SV=2	13	11	13	11	1144	131.1	7.58
P48556	High	26S proteasome non-ATPase regulatory subunit 8 OS=Homo sapiens OX=9606 GN=PSMD8 PE=1 SV=2	31	8	11	8	350	39.6	9.7
P37235	High	Hippocalcin-like protein 1 OS=Homo sapiens OX=9606 GN=HPCAL1 PE=1 SV=3	58	10	17	10	193	22.3	5.35
Q86Y56	High	Dynein assembly factor 5, axonemal OS=Homo sapiens OX=9606 GN=DNAAF5 PE=1 SV=4	17	9	11	9	855	93.5	6.42
Q92947	High	Glutaryl-CoA dehydrogenase, mitochondrial OS=Homo sapiens OX=9606 GN=GCDH PE=1 SV=1	34	7	10	7	438	48.1	8.06
P61221	High	ATP-binding cassette sub-family E member 1 OS=Homo sapiens OX=9606 GN=ABCE1 PE=1 SV=1	18	9	13	9	599	67.3	8.34
Q6NZY4	High	Zinc finger CCHC domain-containing protein 8 OS=Homo sapiens OX=9606 GN=ZCCHC8 PE=1 SV=2	22	9	11	9	707	78.5	4.87
Q8TED0	High	U3 small nucleolar RNA-associated protein 15 homolog OS=Homo sapiens OX=9606 GN=UTP15 PE=1 SV=3	32	11	13	11	518	58.4	9.11
P10644	High	cAMP-dependent protein kinase type I-alpha regulatory subunit OS=Homo sapiens OX=9606 GN=PRKAR1A PE=1 SV=1	27	8	11	7	381	43	5.35
Q9NP72	High	Ras-related protein Rab-18 OS=Homo sapiens OX=9606 GN=RAB18 PE=1 SV=1	42	6	10	6	206	23	5.24
Q9UNE7	High	E3 ubiquitin-protein ligase CHIP OS=Homo sapiens OX=9606 GN=STUB1 PE=1 SV=2	39	9	12	9	303	34.8	5.87
Q9NRX1	High	RNA-binding protein PNO1 OS=Homo sapiens OX=9606 GN=PNO1 PE=1 SV=1	42	8	12	7	252	27.9	9.73
P51151	High	Ras-related protein Rab-9A OS=Homo sapiens OX=9606 GN=RAB9A PE=1 SV=1	58	8	15	8	201	22.8	5.47
P35914	High	Hydroxymethylglutaryl-CoA lyase, mitochondrial OS=Homo sapiens OX=9606 GN=HMGCL PE=1 SV=2	26	6	9	6	325	34.3	8.54
H3BMF4	High	Protein spinster homolog 1 OS=Homo sapiens OX=9606 GN=SPNS1 PE=1 SV=1	15	5	7	5	573	61.1	7.84
P46779	High	60S ribosomal protein L28 OS=Homo sapiens OX=9606 GN=RPL28 PE=1 SV=3	39	7	17	7	137	15.7	12.02
Q9BW92	High	Threonine--tRNA ligase, mitochondrial OS=Homo sapiens OX=9606 GN=TARS2 PE=1 SV=1	18	10	13	10	718	81	7.3
Q6NVY1	High	3-hydroxyisobutyryl-CoA hydrolase, mitochondrial OS=Homo sapiens OX=9606 GN=HIBCH PE=1 SV=2	28	8	12	8	386	43.5	8.19
O00422	High	Histone deacetylase complex subunit SAP18 OS=Homo sapiens OX=9606 GN=SAP18 PE=1 SV=1	50	7	14	7	153	17.6	9.35
P46926	High	Glucosamine-6-phosphate isomerase 1 OS=Homo sapiens OX=9606 GN=GNPDA1 PE=1 SV=1	52	9	11	6	289	32.6	6.92
P32929	High	Cystathionine gamma-lyase OS=Homo sapiens OX=9606 GN=CTH PE=1 SV=3	34	9	11	9	405	44.5	6.7
E9PB61	High	THO complex subunit 4 OS=Homo sapiens OX=9606 GN=ALYREF PE=1 SV=1	34	6	11	6	264	27.5	11.05
Q9NQ50	High	39S ribosomal protein L40, mitochondrial OS=Homo sapiens OX=9606 GN=MRPL40 PE=1 SV=1	41	7	11	7	206	24.5	9.63
P49821	High	NADH dehydrogenase [ubiquinone] flavoprotein 1, mitochondrial OS=Homo sapiens OX=9606 GN=NDUFV1 PE=1 SV=4	40	11	13	11	464	50.8	8.21
Q9Y3B7	High	39S ribosomal protein L11, mitochondrial OS=Homo sapiens OX=9606 GN=MRPL11 PE=1 SV=1	54	9	12	9	192	20.7	9.91
Q92626	High	Peroxidasin homolog OS=Homo sapiens OX=9606 GN=PXDN PE=1 SV=2	14	12	13	12	1479	165.2	7.17
Q96TA2	High	ATP-dependent zinc metalloprotease YME1L1 OS=Homo sapiens OX=9606 GN=YME1L1 PE=1 SV=2	19	9	10	9	773	86.4	8.76
Q9H4B7	High	Tubulin beta-1 chain OS=Homo sapiens OX=9606 GN=TUBB1 PE=1 SV=1	10	5	26	1	451	50.3	5.17
Q92769	High	Histone deacetylase 2 OS=Homo sapiens OX=9606 GN=HDAC2 PE=1 SV=2	31	9	11	6	488	55.3	5.91
Q9Y6B6	High	GTP-binding protein SAR1b OS=Homo sapiens OX=9606 GN=SAR1B PE=1 SV=1	39	7	14	4	198	22.4	6.11
Q9UKN8	High	General transcription factor 3C polypeptide 4 OS=Homo sapiens OX=9606 GN=GTF3C4 PE=1 SV=2	21	9	12	9	822	91.9	6.65
O75915	High	PRA1 family protein 3 OS=Homo sapiens OX=9606 GN=ARL6IP5 PE=1 SV=1	24	5	16	5	188	21.6	9.77
Q9BXY0	High	Protein MAK16 homolog OS=Homo sapiens OX=9606 GN=MAK16 PE=1 SV=2	24	6	13	6	300	35.3	5.38
Q9Y315	High	Deoxyribose-phosphate aldolase OS=Homo sapiens OX=9606 GN=DERA PE=1 SV=2	46	10	10	10	318	35.2	8.94
Q7Z3C6	High	Autophagy-related protein 9A OS=Homo sapiens OX=9606 GN=ATG9A PE=1 SV=3	18	11	11	11	839	94.4	6.67
Q08170	High	Serine/arginine-rich splicing factor 4 OS=Homo sapiens OX=9606 GN=SRSF4 PE=1 SV=2	17	8	12	4	494	56.6	11.52
P10586	High	Receptor-type tyrosine-protein phosphatase F OS=Homo sapiens OX=9606 GN=PTPRF PE=1 SV=2	11	11	13	7	1907	212.7	6.3
O15438	High	Canalicular multispecific organic anion transporter 2 OS=Homo sapiens OX=9606 GN=ABCC3 PE=1 SV=3	11	10	13	9	1527	169.2	7.2
P35052	High	Glypican-1 OS=Homo sapiens OX=9606 GN=GPC1 PE=1 SV=2	23	9	11	9	558	61.6	7.3
A0A0G2JNW7	High	Solute carrier family 12 member 7 OS=Homo sapiens OX=9606 GN=SLC12A7 PE=1 SV=1	13	9	11	8	1083	119.1	6.71
P10606	High	Cytochrome c oxidase subunit 5B, mitochondrial OS=Homo sapiens OX=9606 GN=COX5B PE=1 SV=2	55	6	14	6	129	13.7	8.81
A0A087WUB9	High	Beta-catenin-like protein 1 OS=Homo sapiens OX=9606 GN=CTNNBL1 PE=1 SV=1	29	10	10	10	568	65.7	5.02
O14776	High	Transcription elongation regulator 1 OS=Homo sapiens OX=9606 GN=TCERG1 PE=1 SV=2	11	9	12	9	1098	123.8	8.65
Q9BQ39	High	ATP-dependent RNA helicase DDX50 OS=Homo sapiens OX=9606 GN=DDX50 PE=1 SV=1	20	10	13	7	737	82.5	9.17
Q9NY61	High	Protein AATF OS=Homo sapiens OX=9606 GN=AATF PE=1 SV=1	23	8	11	8	560	63.1	4.94
Q9BUP3	High	Oxidoreductase HTATIP2 OS=Homo sapiens OX=9606 GN=HTATIP2 PE=1 SV=2	41	8	11	8	242	27	8.38
Q9NY93	High	Probable ATP-dependent RNA helicase DDX56 OS=Homo sapiens OX=9606 GN=DDX56 PE=1 SV=1	24	12	13	12	547	61.6	9.26
O43719	High	HIV Tat-specific factor 1 OS=Homo sapiens OX=9606 GN=HTATSF1 PE=1 SV=1	18	10	13	10	755	85.8	4.4
P04114	High	Apolipoprotein B-100 OS=Homo sapiens OX=9606 GN=APOB PE=1 SV=2	2	8	18	7	4563	515.3	7.05
O95861	High	3'(2'),5'-bisphosphate nucleotidase 1 OS=Homo sapiens OX=9606 GN=BPNT1 PE=1 SV=1	49	9	11	9	308	33.4	5.69
A0A0G2JPP5	High	Protein scribble homolog OS=Homo sapiens OX=9606 GN=SCRIB PE=1 SV=1	9	8	10	7	1655	177.6	5.1
P20839	High	Inosine-5'-monophosphate dehydrogenase 1 OS=Homo sapiens OX=9606 GN=IMPDH1 PE=1 SV=2	24	9	11	7	514	55.4	6.9
P40121	High	Macrophage-capping protein OS=Homo sapiens OX=9606 GN=CAPG PE=1 SV=2	32	8	11	8	348	38.5	6.19
Q9P0J1	High	[Pyruvate dehydrogenase [acetyl-transferring]]-phosphatase 1, mitochondrial OS=Homo sapiens OX=9606 GN=PDP1 PE=1 SV=3	29	8	9	8	537	61	6.67
Q08752	High	Peptidyl-prolyl cis-trans isomerase D OS=Homo sapiens OX=9606 GN=PPID PE=1 SV=3	31	10	13	10	370	40.7	7.21
O75683	High	Surfeit locus protein 6 OS=Homo sapiens OX=9606 GN=SURF6 PE=1 SV=3	29	8	13	8	361	41.4	10.64
O60784	High	Target of Myb protein 1 OS=Homo sapiens OX=9606 GN=TOM1 PE=1 SV=2	40	9	10	9	492	53.8	4.7
Q5VWC4	High	26S proteasome non-ATPase regulatory subunit 4 OS=Homo sapiens OX=9606 GN=PSMD4 PE=1 SV=1	30	7	12	1	380	41.1	4.81
J3KS54	High	Protein flightless-1 homolog OS=Homo sapiens OX=9606 GN=FLII PE=1 SV=1	21	8	9	1	700	78	6.32
P30085	High	UMP-CMP kinase OS=Homo sapiens OX=9606 GN=CMPK1 PE=1 SV=3	49	8	10	8	196	22.2	5.57
Q99797	High	Mitochondrial intermediate peptidase OS=Homo sapiens OX=9606 GN=MIPEP PE=1 SV=2	23	10	13	10	713	80.6	7.05
Q16762	High	Thiosulfate sulfurtransferase OS=Homo sapiens OX=9606 GN=TST PE=1 SV=4	34	6	12	6	297	33.4	7.25
O75531	High	Barrier-to-autointegration factor OS=Homo sapiens OX=9606 GN=BANF1 PE=1 SV=1	48	3	15	3	89	10.1	6.09
Q15642	High	Cdc42-interacting protein 4 OS=Homo sapiens OX=9606 GN=TRIP10 PE=1 SV=3	20	8	12	8	601	68.3	5.73
Q16222	High	UDP-N-acetylhexosamine pyrophosphorylase OS=Homo sapiens OX=9606 GN=UAP1 PE=1 SV=3	22	8	12	8	522	58.7	6.33
Q93096	High	Protein tyrosine phosphatase type IVA 1 OS=Homo sapiens OX=9606 GN=PTP4A1 PE=1 SV=2	45	7	11	4	173	19.8	8.97
Q9NQW7	High	Xaa-Pro aminopeptidase 1 OS=Homo sapiens OX=9606 GN=XPNPEP1 PE=1 SV=3	19	8	12	8	623	69.9	5.67
Q15836	High	Vesicle-associated membrane protein 3 OS=Homo sapiens OX=9606 GN=VAMP3 PE=1 SV=3	40	3	14	1	100	11.3	8.79
P51798	High	H(+)/Cl(-) exchange transporter 7 OS=Homo sapiens OX=9606 GN=CLCN7 PE=1 SV=2	14	9	13	9	805	88.6	8.43
F6TLX2	High	Glyoxalase domain-containing protein 4 OS=Homo sapiens OX=9606 GN=GLOD4 PE=1 SV=1	24	10	13	10	502	54.7	8.7
P61254	High	60S ribosomal protein L26 OS=Homo sapiens OX=9606 GN=RPL26 PE=1 SV=1	37	10	23	10	145	17.2	10.55
A0A0G2JJL1	High	WD repeat-containing protein 46 (Fragment) OS=Homo sapiens OX=9606 GN=WDR46 PE=1 SV=1	39	7	9	1	322	35.8	8.88
Q9UNF0	High	Protein kinase C and casein kinase substrate in neurons protein 2 OS=Homo sapiens OX=9606 GN=PACSIN2 PE=1 SV=2	26	10	12	10	486	55.7	5.2
Q9UBQ5	High	Eukaryotic translation initiation factor 3 subunit K OS=Homo sapiens OX=9606 GN=EIF3K PE=1 SV=1	52	8	12	8	218	25	4.93
Q15427	High	Splicing factor 3B subunit 4 OS=Homo sapiens OX=9606 GN=SF3B4 PE=1 SV=1	23	5	9	5	424	44.4	8.56
Q7Z2Z2	High	Elongation factor-like GTPase 1 OS=Homo sapiens OX=9606 GN=EFL1 PE=1 SV=2	14	8	10	8	1120	125.4	5.91
Q9UJX3	High	Anaphase-promoting complex subunit 7 OS=Homo sapiens OX=9606 GN=ANAPC7 PE=1 SV=4	26	9	11	9	599	66.8	5.64
Q5T9B7	High	Adenylate kinase isoenzyme 1 OS=Homo sapiens OX=9606 GN=AK1 PE=1 SV=1	49	9	11	9	210	23.4	8.6
Q9BXW7	High	Haloacid dehalogenase-like hydrolase domain-containing 5 OS=Homo sapiens OX=9606 GN=HDHD5 PE=1 SV=1	30	7	9	7	423	46.3	8.13
E7EVH7	High	Uncharacterized protein OS=Homo sapiens OX=9606 PE=4 SV=1	20	11	12	8	732	83.6	7.31
Q96GK7	High	Fumarylacetoacetate hydrolase domain-containing protein 2A OS=Homo sapiens OX=9606 GN=FAHD2A PE=1 SV=1	32	8	11	1	314	34.6	8.24
Q9Y5Q0	High	Fatty acid desaturase 3 OS=Homo sapiens OX=9606 GN=FADS3 PE=1 SV=1	19	5	8	5	445	51.1	7.77
P78386	High	Keratin, type II cuticular Hb5 OS=Homo sapiens OX=9606 GN=KRT85 PE=1 SV=1	17	10	19	2	507	55.8	6.55
Q9Y6M5	High	Zinc transporter 1 OS=Homo sapiens OX=9606 GN=SLC30A1 PE=1 SV=3	30	9	12	9	507	55.3	6.48
P07858	High	Cathepsin B OS=Homo sapiens OX=9606 GN=CTSB PE=1 SV=3	24	6	13	6	339	37.8	6.3
P19387	High	DNA-directed RNA polymerase II subunit RPB3 OS=Homo sapiens OX=9606 GN=POLR2C PE=1 SV=2	53	9	11	9	275	31.4	4.92
O95478	High	Ribosome biogenesis protein NSA2 homolog OS=Homo sapiens OX=9606 GN=NSA2 PE=1 SV=1	35	7	13	7	260	30	10.27
O75934	High	Pre-mRNA-splicing factor SPF27 OS=Homo sapiens OX=9606 GN=BCAS2 PE=1 SV=1	44	8	11	8	225	26.1	5.66
H0Y5K5	High	Endoplasmic reticulum-Golgi intermediate compartment protein 3 (Fragment) OS=Homo sapiens OX=9606 GN=ERGIC3 PE=1 SV=1	23	9	14	9	397	44.6	6.47
P49959	High	Double-strand break repair protein MRE11 OS=Homo sapiens OX=9606 GN=MRE11 PE=1 SV=3	18	12	14	12	708	80.5	5.9
A6NHL2	High	Tubulin alpha chain-like 3 OS=Homo sapiens OX=9606 GN=TUBAL3 PE=1 SV=2	10	5	14	1	446	49.9	6.05
Q16864	High	V-type proton ATPase subunit F OS=Homo sapiens OX=9606 GN=ATP6V1F PE=1 SV=2	82	7	10	7	119	13.4	5.52
Q9HCS7	High	Pre-mRNA-splicing factor SYF1 OS=Homo sapiens OX=9606 GN=XAB2 PE=1 SV=2	15	9	11	9	855	99.9	6.23
Q96T37	High	RNA-binding protein 15 OS=Homo sapiens OX=9606 GN=RBM15 PE=1 SV=2	17	10	11	10	977	107.1	10.08
Q9BV38	High	WD repeat-containing protein 18 OS=Homo sapiens OX=9606 GN=WDR18 PE=1 SV=2	20	8	11	8	432	47.4	6.7
P54709	High	Sodium/potassium-transporting ATPase subunit beta-3 OS=Homo sapiens OX=9606 GN=ATP1B3 PE=1 SV=1	34	7	11	7	279	31.5	8.35
O43772	High	Mitochondrial carnitine/acylcarnitine carrier protein OS=Homo sapiens OX=9606 GN=SLC25A20 PE=1 SV=1	44	9	12	9	301	32.9	9.41
Q01970	High	1-phosphatidylinositol 4,5-bisphosphate phosphodiesterase beta-3 OS=Homo sapiens OX=9606 GN=PLCB3 PE=1 SV=2	12	9	10	9	1234	138.7	5.9
P78330	High	Phosphoserine phosphatase OS=Homo sapiens OX=9606 GN=PSPH PE=1 SV=2	44	8	12	8	225	25	5.69
O95433	High	Activator of 90 kDa heat shock protein ATPase homolog 1 OS=Homo sapiens OX=9606 GN=AHSA1 PE=1 SV=1	34	7	12	7	338	38.3	5.53
O15260	High	Surfeit locus protein 4 OS=Homo sapiens OX=9606 GN=SURF4 PE=1 SV=3	21	5	16	5	269	30.4	7.78
Q15006	High	ER membrane protein complex subunit 2 OS=Homo sapiens OX=9606 GN=EMC2 PE=1 SV=1	32	7	11	7	297	34.8	6.57
Q06787	High	Synaptic functional regulator FMR1 OS=Homo sapiens OX=9606 GN=FMR1 PE=1 SV=1	16	8	11	6	632	71.1	7.42
Q9UEW8	High	STE20/SPS1-related proline-alanine-rich protein kinase OS=Homo sapiens OX=9606 GN=STK39 PE=1 SV=3	22	7	9	5	545	59.4	6.29
P13807	High	Glycogen [starch] synthase, muscle OS=Homo sapiens OX=9606 GN=GYS1 PE=1 SV=2	16	7	9	7	737	83.7	6.18
Q9NQT5	High	Exosome complex component RRP40 OS=Homo sapiens OX=9606 GN=EXOSC3 PE=1 SV=3	54	8	11	8	275	29.6	8.1
Q6P1M0	High	Long-chain fatty acid transport protein 4 OS=Homo sapiens OX=9606 GN=SLC27A4 PE=1 SV=1	19	8	11	8	643	72	8.47
Q15382	High	GTP-binding protein Rheb OS=Homo sapiens OX=9606 GN=RHEB PE=1 SV=1	39	5	9	5	184	20.5	5.92
Q15785	High	Mitochondrial import receptor subunit TOM34 OS=Homo sapiens OX=9606 GN=TOMM34 PE=1 SV=2	35	8	9	8	309	34.5	8.98
Q92597	High	Protein NDRG1 OS=Homo sapiens OX=9606 GN=NDRG1 PE=1 SV=1	33	7	9	7	394	42.8	5.82
Q96C86	High	m7GpppX diphosphatase OS=Homo sapiens OX=9606 GN=DCPS PE=1 SV=2	29	6	11	6	337	38.6	6.38
Q9H936	High	Mitochondrial glutamate carrier 1 OS=Homo sapiens OX=9606 GN=SLC25A22 PE=1 SV=1	41	8	9	8	323	34.4	9.29
E9PFW3	High	AP-2 complex subunit mu OS=Homo sapiens OX=9606 GN=AP2M1 PE=1 SV=1	30	11	13	11	460	52.3	9.5
P78346	High	Ribonuclease P protein subunit p30 OS=Homo sapiens OX=9606 GN=RPP30 PE=1 SV=1	34	6	9	6	268	29.3	8.91
Q7Z4Q2	High	HEAT repeat-containing protein 3 OS=Homo sapiens OX=9606 GN=HEATR3 PE=1 SV=2	18	8	9	8	680	74.5	5.11
Q9UDY4	High	DnaJ homolog subfamily B member 4 OS=Homo sapiens OX=9606 GN=DNAJB4 PE=1 SV=1	38	10	11	8	337	37.8	8.5
P46108	High	Adapter molecule crk OS=Homo sapiens OX=9606 GN=CRK PE=1 SV=2	34	8	10	8	304	33.8	5.55
Q9P2I0	High	Cleavage and polyadenylation specificity factor subunit 2 OS=Homo sapiens OX=9606 GN=CPSF2 PE=1 SV=2	18	9	10	9	782	88.4	5.11
Q9BT22	High	Chitobiosyldiphosphodolichol beta-mannosyltransferase OS=Homo sapiens OX=9606 GN=ALG1 PE=1 SV=2	23	7	8	7	464	52.5	7.23
P25815	High	Protein S100-P OS=Homo sapiens OX=9606 GN=S100P PE=1 SV=2	79	5	13	5	95	10.4	4.88
Q9Y6Y8	High	SEC23-interacting protein OS=Homo sapiens OX=9606 GN=SEC23IP PE=1 SV=1	17	11	13	10	1000	111	5.54
A0A0A0MT49	High	Transcription activator BRG1 OS=Homo sapiens OX=9606 GN=SMARCA4 PE=1 SV=1	8	8	9	7	1681	188.7	8.12
E7ETB3	High	Aspartyl aminopeptidase OS=Homo sapiens OX=9606 GN=DNPEP PE=1 SV=2	27	8	9	8	493	54.5	7.74
Q8N5N7	High	39S ribosomal protein L50, mitochondrial OS=Homo sapiens OX=9606 GN=MRPL50 PE=1 SV=2	55	6	10	6	158	18.3	7.88
P32970	High	CD70 antigen OS=Homo sapiens OX=9606 GN=CD70 PE=1 SV=2	35	6	12	6	193	21.1	8.53
D6RF35	High	Vitamin D-binding protein OS=Homo sapiens OX=9606 GN=GC PE=1 SV=1	10	3	15	3	476	53	5.52
A0A2R8Y602	High	Caseinolytic peptidase B protein homolog (Fragment) OS=Homo sapiens OX=9606 GN=CLPB PE=1 SV=1	27	8	10	1	382	43.3	6.96
Q86V48	High	Leucine zipper protein 1 OS=Homo sapiens OX=9606 GN=LUZP1 PE=1 SV=2	14	12	13	12	1076	120.2	8.5
Q16134	High	Electron transfer flavoprotein-ubiquinone oxidoreductase, mitochondrial OS=Homo sapiens OX=9606 GN=ETFDH PE=1 SV=2	17	6	8	6	617	68.5	7.55
B4DUT8	High	Calponin OS=Homo sapiens OX=9606 GN=CNN2 PE=1 SV=1	24	6	10	5	330	35.9	7.3
A0A494BZV2	High	Myosin phosphatase Rho-interacting protein OS=Homo sapiens OX=9606 GN=MPRIP PE=1 SV=1	7	11	11	11	2425	274.2	5.6
Q9ULG6	High	Cell cycle progression protein 1 OS=Homo sapiens OX=9606 GN=CCPG1 PE=1 SV=3	15	9	10	9	757	87.3	5.95
A0A286YFF7	High	Palmitoyl-protein thioesterase 1 OS=Homo sapiens OX=9606 GN=PPT1 PE=1 SV=1	33	6	10	6	335	37.1	6.52
Q9HB90	High	Ras-related GTP-binding protein C OS=Homo sapiens OX=9606 GN=RRAGC PE=1 SV=1	23	7	9	7	399	44.2	5.1
Q5JXI8	High	Four and a half LIM domains protein 1 (Fragment) OS=Homo sapiens OX=9606 GN=FHL1 PE=1 SV=1	34	7	15	7	257	29.1	8.27
P82933	High	28S ribosomal protein S9, mitochondrial OS=Homo sapiens OX=9606 GN=MRPS9 PE=1 SV=2	32	9	11	9	396	45.8	9.51
O76003	High	Glutaredoxin-3 OS=Homo sapiens OX=9606 GN=GLRX3 PE=1 SV=2	30	8	13	8	335	37.4	5.39
Q15631	High	Translin OS=Homo sapiens OX=9606 GN=TSN PE=1 SV=1	33	7	14	7	228	26.2	6.44
P25788	High	Proteasome subunit alpha type-3 OS=Homo sapiens OX=9606 GN=PSMA3 PE=1 SV=2	34	9	14	9	255	28.4	5.33
Q86Y82	High	Syntaxin-12 OS=Homo sapiens OX=9606 GN=STX12 PE=1 SV=1	48	9	10	9	276	31.6	5.59
A0A087X1Z3	High	Proteasome activator complex subunit 2 OS=Homo sapiens OX=9606 GN=PSME2 PE=1 SV=1	42	7	9	7	254	29.1	6.71
Q7Z7K6	High	Centromere protein V OS=Homo sapiens OX=9606 GN=CENPV PE=1 SV=1	46	6	9	3	275	29.9	9.73
P23786	High	Carnitine O-palmitoyltransferase 2, mitochondrial OS=Homo sapiens OX=9606 GN=CPT2 PE=1 SV=2	20	11	14	11	658	73.7	8.18
Q8WVM8	High	Sec1 family domain-containing protein 1 OS=Homo sapiens OX=9606 GN=SCFD1 PE=1 SV=4	23	8	10	8	642	72.3	6.27
Q9NX24	High	H/ACA ribonucleoprotein complex subunit 2 OS=Homo sapiens OX=9606 GN=NHP2 PE=1 SV=1	35	3	13	3	153	17.2	8.22
E7ESC6	High	Exportin-7 OS=Homo sapiens OX=9606 GN=XPO7 PE=1 SV=1	13	10	11	10	1088	124	6.48
O15511	High	Actin-related protein 2/3 complex subunit 5 OS=Homo sapiens OX=9606 GN=ARPC5 PE=1 SV=3	62	7	10	7	151	16.3	5.67
Q8WWI1	High	LIM domain only protein 7 OS=Homo sapiens OX=9606 GN=LMO7 PE=1 SV=3	10	10	11	10	1683	192.6	8.09
Q96LD4	High	E3 ubiquitin-protein ligase TRIM47 OS=Homo sapiens OX=9606 GN=TRIM47 PE=1 SV=2	21	8	9	8	638	69.5	6.44
Q92614	High	Unconventional myosin-XVIIIa OS=Homo sapiens OX=9606 GN=MYO18A PE=1 SV=3	7	10	12	10	2054	233	6.3
A0A0G2JHC2	High	PPP1R18 OS=Homo sapiens OX=9606 GN=PPP1R18 PE=1 SV=1	26	8	10	8	613	68	5.45
Q8IX12	High	Cell division cycle and apoptosis regulator protein 1 OS=Homo sapiens OX=9606 GN=CCAR1 PE=1 SV=2	12	11	12	11	1150	132.7	5.76
Q9Y3C1	High	Nucleolar protein 16 OS=Homo sapiens OX=9606 GN=NOP16 PE=1 SV=2	51	8	10	8	178	21.2	9.94
Q8NHH9	High	Atlastin-2 OS=Homo sapiens OX=9606 GN=ATL2 PE=1 SV=2	20	7	13	7	583	66.2	5.48
Q9Y2R4	High	Probable ATP-dependent RNA helicase DDX52 OS=Homo sapiens OX=9606 GN=DDX52 PE=1 SV=3	25	8	8	8	599	67.5	9.67
Q96N66	High	Lysophospholipid acyltransferase 7 OS=Homo sapiens OX=9606 GN=MBOAT7 PE=1 SV=2	18	6	12	6	472	52.7	8.97
B4DUC8	High	S-methyl-5'-thioadenosine phosphorylase OS=Homo sapiens OX=9606 GN=MTAP PE=1 SV=1	42	7	11	6	300	33.2	7.46
O00411	High	DNA-directed RNA polymerase, mitochondrial OS=Homo sapiens OX=9606 GN=POLRMT PE=1 SV=2	13	9	9	9	1230	138.5	8.98
P50479	High	PDZ and LIM domain protein 4 OS=Homo sapiens OX=9606 GN=PDLIM4 PE=1 SV=2	35	8	11	8	330	35.4	7.91
P48147	High	Prolyl endopeptidase OS=Homo sapiens OX=9606 GN=PREP PE=1 SV=2	24	11	12	11	710	80.6	5.86
A0A087X0R6	High	Sorting nexin-12 OS=Homo sapiens OX=9606 GN=SNX12 PE=1 SV=1	56	7	10	5	172	19.8	7.78
Q13488	High	V-type proton ATPase 116 kDa subunit a isoform 3 OS=Homo sapiens OX=9606 GN=TCIRG1 PE=1 SV=3	13	8	12	7	830	92.9	7.12
O00303	High	Eukaryotic translation initiation factor 3 subunit F OS=Homo sapiens OX=9606 GN=EIF3F PE=1 SV=1	28	7	15	7	357	37.5	5.45
O76031	High	ATP-dependent Clp protease ATP-binding subunit clpX-like, mitochondrial OS=Homo sapiens OX=9606 GN=CLPX PE=1 SV=2	20	9	9	9	633	69.2	7.58
O75616	High	GTPase Era, mitochondrial OS=Homo sapiens OX=9606 GN=ERAL1 PE=1 SV=2	25	8	10	8	437	48.3	8.84
Q13057	High	Bifunctional coenzyme A synthase OS=Homo sapiens OX=9606 GN=COASY PE=1 SV=4	25	8	11	7	564	62.3	6.99
Q9NQG5	High	Regulation of nuclear pre-mRNA domain-containing protein 1B OS=Homo sapiens OX=9606 GN=RPRD1B PE=1 SV=1	30	6	11	6	326	36.9	5.97
Q7L5N1	High	COP9 signalosome complex subunit 6 OS=Homo sapiens OX=9606 GN=COPS6 PE=1 SV=1	35	7	9	7	327	36.1	5.73
P30626	High	Sorcin OS=Homo sapiens OX=9606 GN=SRI PE=1 SV=1	42	7	13	7	198	21.7	5.59
P11182	High	Lipoamide acyltransferase component of branched-chain alpha-keto acid dehydrogenase complex, mitochondrial OS=Homo sapiens OX=9606 GN=DBT PE=1 SV=3	25	8	10	8	482	53.5	8.51
Q641Q2	High	WASH complex subunit 2A OS=Homo sapiens OX=9606 GN=WASHC2A PE=1 SV=3	13	10	10	10	1341	147.1	4.81
O43488	High	Aflatoxin B1 aldehyde reductase member 2 OS=Homo sapiens OX=9606 GN=AKR7A2 PE=1 SV=3	43	8	11	8	359	39.6	7.17
P55039	High	Developmentally-regulated GTP-binding protein 2 OS=Homo sapiens OX=9606 GN=DRG2 PE=1 SV=1	31	9	10	8	364	40.7	8.88
K7EK60	High	Formin-like protein 1 OS=Homo sapiens OX=9606 GN=FMNL1 PE=1 SV=1	22	11	12	2	682	74.6	6.28
P13073	High	Cytochrome c oxidase subunit 4 isoform 1, mitochondrial OS=Homo sapiens OX=9606 GN=COX4I1 PE=1 SV=1	31	5	12	5	169	19.6	9.51
G5E9Z2	High	Cisplatin resistance related protein CRR9p, isoform CRA_c OS=Homo sapiens OX=9606 GN=CLPTM1L PE=1 SV=1	30	7	11	1	369	43.3	8.79
O00442	High	RNA 3'-terminal phosphate cyclase OS=Homo sapiens OX=9606 GN=RTCA PE=1 SV=1	29	7	9	7	366	39.3	7.85
Q8NCW5	High	NAD(P)H-hydrate epimerase OS=Homo sapiens OX=9606 GN=NAXE PE=1 SV=2	35	8	15	8	288	31.7	7.66
Q86XL3	High	Ankyrin repeat and LEM domain-containing protein 2 OS=Homo sapiens OX=9606 GN=ANKLE2 PE=1 SV=4	17	9	9	9	938	104.1	7.09
P14927	High	Cytochrome b-c1 complex subunit 7 OS=Homo sapiens OX=9606 GN=UQCRB PE=1 SV=2	58	7	12	7	111	13.5	8.78
Q9BRQ8	High	Apoptosis-inducing factor 2 OS=Homo sapiens OX=9606 GN=AIFM2 PE=1 SV=1	24	6	9	6	373	40.5	9.11
P23458	High	Tyrosine-protein kinase JAK1 OS=Homo sapiens OX=9606 GN=JAK1 PE=1 SV=2	11	9	11	9	1154	133.2	7.55
P16671	High	Platelet glycoprotein 4 OS=Homo sapiens OX=9606 GN=CD36 PE=1 SV=2	18	8	9	8	472	53	7.96
O95602	High	DNA-directed RNA polymerase I subunit RPA1 OS=Homo sapiens OX=9606 GN=POLR1A PE=1 SV=2	8	9	9	9	1720	194.7	7.03
Q14376	High	UDP-glucose 4-epimerase OS=Homo sapiens OX=9606 GN=GALE PE=1 SV=2	32	6	11	6	348	38.3	6.73
Q9HC36	High	rRNA methyltransferase 3, mitochondrial OS=Homo sapiens OX=9606 GN=MRM3 PE=1 SV=2	31	9	13	9	420	47	8.73
O75828	High	Carbonyl reductase [NADPH] 3 OS=Homo sapiens OX=9606 GN=CBR3 PE=1 SV=3	32	6	12	2	277	30.8	6.18
P23368	High	NAD-dependent malic enzyme, mitochondrial OS=Homo sapiens OX=9606 GN=ME2 PE=1 SV=1	24	8	11	7	584	65.4	7.61
Q06323	High	Proteasome activator complex subunit 1 OS=Homo sapiens OX=9606 GN=PSME1 PE=1 SV=1	41	10	11	10	249	28.7	6.02
Q9H4A6	High	Golgi phosphoprotein 3 OS=Homo sapiens OX=9606 GN=GOLPH3 PE=1 SV=1	39	8	13	8	298	33.8	6.44
P51398	High	28S ribosomal protein S29, mitochondrial OS=Homo sapiens OX=9606 GN=DAP3 PE=1 SV=1	26	7	12	7	398	45.5	8.88
Q86SQ0	High	Pleckstrin homology-like domain family B member 2 OS=Homo sapiens OX=9606 GN=PHLDB2 PE=1 SV=2	12	10	11	10	1253	142.1	7.43
K7EM18	High	Eukaryotic translation initiation factor 1 OS=Homo sapiens OX=9606 GN=EIF1 PE=1 SV=1	38	6	9	2	121	13.6	7.9
Q9H0S4	High	Probable ATP-dependent RNA helicase DDX47 OS=Homo sapiens OX=9606 GN=DDX47 PE=1 SV=1	25	8	9	8	455	50.6	9.1
Q9UP95	High	Solute carrier family 12 member 4 OS=Homo sapiens OX=9606 GN=SLC12A4 PE=1 SV=2	12	10	12	4	1085	120.6	6.44
Q9BT67	High	NEDD4 family-interacting protein 1 OS=Homo sapiens OX=9606 GN=NDFIP1 PE=1 SV=1	46	8	11	8	221	24.9	4.68
Q14558	High	Phosphoribosyl pyrophosphate synthase-associated protein 1 OS=Homo sapiens OX=9606 GN=PRPSAP1 PE=1 SV=2	29	7	12	5	356	39.4	7.2
P78316	High	Nucleolar protein 14 OS=Homo sapiens OX=9606 GN=NOP14 PE=1 SV=3	14	11	12	11	857	97.6	7.58
Q96G03	High	Phosphoglucomutase-2 OS=Homo sapiens OX=9606 GN=PGM2 PE=1 SV=4	20	9	12	9	612	68.2	6.73
O14929	High	Histone acetyltransferase type B catalytic subunit OS=Homo sapiens OX=9606 GN=HAT1 PE=1 SV=1	35	8	11	8	419	49.5	5.69
P26447	High	Protein S100-A4 OS=Homo sapiens OX=9606 GN=S100A4 PE=1 SV=1	37	5	18	5	101	11.7	6.11
G0XQ39	High	STIM1L OS=Homo sapiens OX=9606 GN=STIM1 PE=1 SV=1	19	11	11	11	791	88.6	6.64
Q96PC5	High	Melanoma inhibitory activity protein 2 OS=Homo sapiens OX=9606 GN=MIA2 PE=1 SV=4	12	11	11	11	1412	159.7	4.69
P36507	High	Dual specificity mitogen-activated protein kinase kinase 2 OS=Homo sapiens OX=9606 GN=MAP2K2 PE=1 SV=1	30	9	9	4	400	44.4	6.55
Q13123	High	Protein Red OS=Homo sapiens OX=9606 GN=IK PE=1 SV=3	25	10	11	10	557	65.6	6.64
P23141	High	Liver carboxylesterase 1 OS=Homo sapiens OX=9606 GN=CES1 PE=1 SV=2	22	10	13	10	567	62.5	6.6
P10620	High	Microsomal glutathione S-transferase 1 OS=Homo sapiens OX=9606 GN=MGST1 PE=1 SV=1	27	4	12	4	155	17.6	9.39
Q15024	High	Exosome complex component RRP42 OS=Homo sapiens OX=9606 GN=EXOSC7 PE=1 SV=3	50	8	9	8	291	31.8	5.19
Q687X5	High	Metalloreductase STEAP4 OS=Homo sapiens OX=9606 GN=STEAP4 PE=1 SV=1	24	8	12	8	459	51.9	9.29
P61513	High	60S ribosomal protein L37a OS=Homo sapiens OX=9606 GN=RPL37A PE=1 SV=2	59	6	14	6	92	10.3	10.43
P46199	High	Translation initiation factor IF-2, mitochondrial OS=Homo sapiens OX=9606 GN=MTIF2 PE=1 SV=2	13	7	10	7	727	81.3	7.15
Q13616	High	Cullin-1 OS=Homo sapiens OX=9606 GN=CUL1 PE=1 SV=2	15	7	10	7	776	89.6	8
A0A0B4J1V8	High	HCG2039996 OS=Homo sapiens OX=9606 GN=PPAN-P2RY11 PE=3 SV=1	19	9	12	9	794	87.9	9.51
P19784	High	Casein kinase II subunit alpha' OS=Homo sapiens OX=9606 GN=CSNK2A2 PE=1 SV=1	38	9	9	8	350	41.2	8.56
P49721	High	Proteasome subunit beta type-2 OS=Homo sapiens OX=9606 GN=PSMB2 PE=1 SV=1	49	6	8	6	201	22.8	7.02
Q6IAN0	High	Dehydrogenase/reductase SDR family member 7B OS=Homo sapiens OX=9606 GN=DHRS7B PE=1 SV=2	30	7	10	7	325	35.1	9.55
P35573	High	Glycogen debranching enzyme OS=Homo sapiens OX=9606 GN=AGL PE=1 SV=3	12	9	9	9	1532	174.7	6.76
Q12765	High	Secernin-1 OS=Homo sapiens OX=9606 GN=SCRN1 PE=1 SV=2	26	7	12	7	414	46.4	4.75
J3KMZ9	High	Low-density lipoprotein receptor (Fragment) OS=Homo sapiens OX=9606 GN=LDLR PE=1 SV=1	17	9	9	9	945	104.6	5.27
Q7Z7H5	High	Transmembrane emp24 domain-containing protein 4 OS=Homo sapiens OX=9606 GN=TMED4 PE=1 SV=1	30	6	12	4	227	25.9	8.28
Q02388	High	Collagen alpha-1(VII) chain OS=Homo sapiens OX=9606 GN=COL7A1 PE=1 SV=2	7	10	10	10	2944	295	6.27
Q8WW59	High	SPRY domain-containing protein 4 OS=Homo sapiens OX=9606 GN=SPRYD4 PE=1 SV=2	49	7	12	7	207	23.1	6.93
Q96J84	High	Kin of IRRE-like protein 1 OS=Homo sapiens OX=9606 GN=KIRREL1 PE=1 SV=2	21	8	9	8	757	83.5	5.73
G5EA09	High	Syndecan binding protein (Syntenin), isoform CRA_a OS=Homo sapiens OX=9606 GN=SDCBP PE=1 SV=1	32	6	9	6	318	34.8	8.51
P61081	High	NEDD8-conjugating enzyme Ubc12 OS=Homo sapiens OX=9606 GN=UBE2M PE=1 SV=1	37	6	11	6	183	20.9	7.69
Q13217	High	DnaJ homolog subfamily C member 3 OS=Homo sapiens OX=9606 GN=DNAJC3 PE=1 SV=1	21	7	12	7	504	57.5	6.15
P29353	High	SHC-transforming protein 1 OS=Homo sapiens OX=9606 GN=SHC1 PE=1 SV=4	17	6	8	6	583	62.8	6.44
Q92643	High	GPI-anchor transamidase OS=Homo sapiens OX=9606 GN=PIGK PE=1 SV=2	27	7	10	7	395	45.2	6.16
Q9NYH9	High	U3 small nucleolar RNA-associated protein 6 homolog OS=Homo sapiens OX=9606 GN=UTP6 PE=2 SV=2	16	8	13	8	597	70.1	7.28
Q8N5K1	High	CDGSH iron-sulfur domain-containing protein 2 OS=Homo sapiens OX=9606 GN=CISD2 PE=1 SV=1	45	6	9	6	135	15.3	9.61
P04080	High	Cystatin-B OS=Homo sapiens OX=9606 GN=CSTB PE=1 SV=2	55	4	13	4	98	11.1	7.56
O14908	High	PDZ domain-containing protein GIPC1 OS=Homo sapiens OX=9606 GN=GIPC1 PE=1 SV=2	36	8	11	7	333	36	6.28
Q9Y673	High	Dolichyl-phosphate beta-glucosyltransferase OS=Homo sapiens OX=9606 GN=ALG5 PE=1 SV=1	28	8	13	8	324	36.9	9.28
Q8NFW8	High	N-acylneuraminate cytidylyltransferase OS=Homo sapiens OX=9606 GN=CMAS PE=1 SV=2	28	10	11	10	434	48.3	7.93
O95372	High	Acyl-protein thioesterase 2 OS=Homo sapiens OX=9606 GN=LYPLA2 PE=1 SV=1	37	6	10	6	231	24.7	7.23
Q9HC07	High	Transmembrane protein 165 OS=Homo sapiens OX=9606 GN=TMEM165 PE=1 SV=1	21	4	10	4	324	34.9	7.02
Q06033	High	Inter-alpha-trypsin inhibitor heavy chain H3 OS=Homo sapiens OX=9606 GN=ITIH3 PE=1 SV=2	6	6	14	6	890	99.8	5.74
Q9NR45	High	Sialic acid synthase OS=Homo sapiens OX=9606 GN=NANS PE=1 SV=2	26	5	10	5	359	40.3	6.74
H7C3W8	High	Leucine-rich PPR motif-containing protein, mitochondrial (Fragment) OS=Homo sapiens OX=9606 GN=LRPPRC PE=1 SV=1	66	4	12	1	77	8.7	6.65
Q92930	High	Ras-related protein Rab-8B OS=Homo sapiens OX=9606 GN=RAB8B PE=1 SV=2	28	5	22	1	207	23.6	9.07
P08962	High	CD63 antigen OS=Homo sapiens OX=9606 GN=CD63 PE=1 SV=2	19	5	18	5	238	25.6	7.81
Q6UN15	High	Pre-mRNA 3'-end-processing factor FIP1 OS=Homo sapiens OX=9606 GN=FIP1L1 PE=1 SV=1	24	7	9	1	594	66.5	5.59
Q9UBV8	High	Peflin OS=Homo sapiens OX=9606 GN=PEF1 PE=1 SV=1	32	5	8	5	284	30.4	6.54
P50336	High	Protoporphyrinogen oxidase OS=Homo sapiens OX=9606 GN=PPOX PE=1 SV=1	24	6	8	6	477	50.7	8.16
P50552	High	Vasodilator-stimulated phosphoprotein OS=Homo sapiens OX=9606 GN=VASP PE=1 SV=3	23	7	10	7	380	39.8	8.94
Q9NYK5	High	39S ribosomal protein L39, mitochondrial OS=Homo sapiens OX=9606 GN=MRPL39 PE=1 SV=3	30	6	12	6	338	38.7	7.65
Q9HD26	High	Golgi-associated PDZ and coiled-coil motif-containing protein OS=Homo sapiens OX=9606 GN=GOPC PE=1 SV=1	26	8	9	8	462	50.5	5.92
Q8N0X7	High	Spartin OS=Homo sapiens OX=9606 GN=SPART PE=1 SV=1	17	7	9	7	666	72.8	5.91
O60524	High	Nuclear export mediator factor NEMF OS=Homo sapiens OX=9606 GN=NEMF PE=1 SV=4	11	10	12	10	1076	122.9	6.35
Q96B97	High	SH3 domain-containing kinase-binding protein 1 OS=Homo sapiens OX=9606 GN=SH3KBP1 PE=1 SV=2	15	8	11	8	665	73.1	6.62
Q6IAA8	High	Ragulator complex protein LAMTOR1 OS=Homo sapiens OX=9606 GN=LAMTOR1 PE=1 SV=2	50	6	9	6	161	17.7	5.15
P28290	High	Protein ITPRID2 OS=Homo sapiens OX=9606 GN=ITPRID2 PE=1 SV=3	12	11	11	11	1259	138.3	5.19
Q9GZR2	High	RNA exonuclease 4 OS=Homo sapiens OX=9606 GN=REXO4 PE=1 SV=2	33	10	14	10	422	46.6	9.77
Q15526	High	Surfeit locus protein 1 OS=Homo sapiens OX=9606 GN=SURF1 PE=1 SV=1	29	6	11	6	300	33.3	9.6
Q96QR8	High	Transcriptional activator protein Pur-beta OS=Homo sapiens OX=9606 GN=PURB PE=1 SV=3	32	5	7	5	312	33.2	5.43
Q9HA77	High	Probable cysteine--tRNA ligase, mitochondrial OS=Homo sapiens OX=9606 GN=CARS2 PE=1 SV=1	17	9	12	9	564	62.2	8.34
P40763	High	Signal transducer and activator of transcription 3 OS=Homo sapiens OX=9606 GN=STAT3 PE=1 SV=2	15	7	10	7	770	88	6.3
Q96A26	High	Protein FAM162A OS=Homo sapiens OX=9606 GN=FAM162A PE=1 SV=2	31	5	12	5	154	17.3	9.77
P49711	High	Transcriptional repressor CTCF OS=Homo sapiens OX=9606 GN=CTCF PE=1 SV=1	16	7	8	7	727	82.7	6.96
O43264	High	Centromere/kinetochore protein zw10 homolog OS=Homo sapiens OX=9606 GN=ZW10 PE=1 SV=3	18	9	11	9	779	88.8	6.27
Q9Y2T3	High	Guanine deaminase OS=Homo sapiens OX=9606 GN=GDA PE=1 SV=1	25	6	9	6	454	51	5.68
O00743	High	Serine/threonine-protein phosphatase 6 catalytic subunit OS=Homo sapiens OX=9606 GN=PPP6C PE=1 SV=1	33	7	8	7	305	35.1	5.69
Q53GS7	High	Nucleoporin GLE1 OS=Homo sapiens OX=9606 GN=GLE1 PE=1 SV=2	19	8	10	8	698	79.8	7.43
Q9H074	High	Polyadenylate-binding protein-interacting protein 1 OS=Homo sapiens OX=9606 GN=PAIP1 PE=1 SV=1	24	8	12	8	479	53.5	4.81
A0A087WX97	High	Bcl-2-like protein 13 OS=Homo sapiens OX=9606 GN=BCL2L13 PE=1 SV=1	20	6	10	6	509	54.4	4.54
O00273	High	DNA fragmentation factor subunit alpha OS=Homo sapiens OX=9606 GN=DFFA PE=1 SV=1	21	5	7	5	331	36.5	4.79
Q96A72	High	Protein mago nashi homolog 2 OS=Homo sapiens OX=9606 GN=MAGOHB PE=1 SV=1	49	6	12	6	148	17.3	6.39
O15228	High	Dihydroxyacetone phosphate acyltransferase OS=Homo sapiens OX=9606 GN=GNPAT PE=1 SV=1	13	6	9	6	680	77.1	6.57
Q8NEZ5	High	F-box only protein 22 OS=Homo sapiens OX=9606 GN=FBXO22 PE=1 SV=1	24	7	10	7	403	44.5	7.03
H7C2K6	High	Band 4.1-like protein 1 (Fragment) OS=Homo sapiens OX=9606 GN=EPB41L1 PE=1 SV=1	44	9	14	1	268	29.1	5.63
P26583	High	High mobility group protein B2 OS=Homo sapiens OX=9606 GN=HMGB2 PE=1 SV=2	30	8	15	6	209	24	7.81
Q8WWY3	High	U4/U6 small nuclear ribonucleoprotein Prp31 OS=Homo sapiens OX=9606 GN=PRPF31 PE=1 SV=2	22	7	10	7	499	55.4	5.78
Q9UBM7	High	7-dehydrocholesterol reductase OS=Homo sapiens OX=9606 GN=DHCR7 PE=1 SV=1	14	6	11	6	475	54.5	8.7
P24666	High	Low molecular weight phosphotyrosine protein phosphatase OS=Homo sapiens OX=9606 GN=ACP1 PE=1 SV=3	66	7	13	7	158	18	6.74
O60499	High	Syntaxin-10 OS=Homo sapiens OX=9606 GN=STX10 PE=1 SV=1	41	5	10	4	249	28.1	4.89
A0A0D9SFE4	High	Dynamin-1 OS=Homo sapiens OX=9606 GN=DNM1 PE=1 SV=1	11	8	10	1	864	97.2	7.74
D6W592	High	Heterogeneous nuclear ribonucleoprotein L-like OS=Homo sapiens OX=9606 GN=HNRNPLL PE=1 SV=1	23	9	9	8	542	60.1	7.85
O95470	High	Sphingosine-1-phosphate lyase 1 OS=Homo sapiens OX=9606 GN=SGPL1 PE=1 SV=3	25	9	10	9	568	63.5	9.16
Q09028	High	Histone-binding protein RBBP4 OS=Homo sapiens OX=9606 GN=RBBP4 PE=1 SV=3	22	7	12	4	425	47.6	4.89
Q9Y4E8	High	Ubiquitin carboxyl-terminal hydrolase 15 OS=Homo sapiens OX=9606 GN=USP15 PE=1 SV=3	12	8	11	8	981	112.3	5.22
Q53H82	High	Endoribonuclease LACTB2 OS=Homo sapiens OX=9606 GN=LACTB2 PE=1 SV=2	28	6	9	6	288	32.8	6.8
O96019	High	Actin-like protein 6A OS=Homo sapiens OX=9606 GN=ACTL6A PE=1 SV=1	25	6	8	6	429	47.4	5.6
Q16629	High	Serine/arginine-rich splicing factor 7 OS=Homo sapiens OX=9606 GN=SRSF7 PE=1 SV=1	21	5	14	4	238	27.4	11.82
P01024	High	Complement C3 OS=Homo sapiens OX=9606 GN=C3 PE=1 SV=2	6	7	10	7	1663	187	6.4
E9PI68	High	Signal peptidase complex subunit 2 OS=Homo sapiens OX=9606 GN=SPCS2 PE=1 SV=1	22	5	11	5	257	28.5	8.79
O43290	High	U4/U6.U5 tri-snRNP-associated protein 1 OS=Homo sapiens OX=9606 GN=SART1 PE=1 SV=1	19	9	9	9	800	90.2	6.13
A0A590UK80	High	Uncharacterized protein (Fragment) OS=Homo sapiens OX=9606 PE=4 SV=1	8	7	10	3	1090	121	6.84
Q49A26	High	Putative oxidoreductase GLYR1 OS=Homo sapiens OX=9606 GN=GLYR1 PE=1 SV=4	20	6	7	6	553	60.5	9.17
Q04323	High	UBX domain-containing protein 1 OS=Homo sapiens OX=9606 GN=UBXN1 PE=1 SV=2	41	6	9	6	297	33.3	5.25
P16083	High	Ribosyldihydronicotinamide dehydrogenase [quinone] OS=Homo sapiens OX=9606 GN=NQO2 PE=1 SV=5	46	7	9	7	231	25.9	6.29
Q9P0K7	High	Ankycorbin OS=Homo sapiens OX=9606 GN=RAI14 PE=1 SV=2	11	8	9	8	980	110	6.21
Q01844	High	RNA-binding protein EWS OS=Homo sapiens OX=9606 GN=EWSR1 PE=1 SV=1	12	5	15	5	656	68.4	9.33
Q5H9R7	High	Serine/threonine-protein phosphatase 6 regulatory subunit 3 OS=Homo sapiens OX=9606 GN=PPP6R3 PE=1 SV=2	13	8	10	8	873	97.6	4.6
O00622	High	CCN family member 1 OS=Homo sapiens OX=9606 GN=CCN1 PE=1 SV=1	30	7	10	7	381	42	8.21
Q13564	High	NEDD8-activating enzyme E1 regulatory subunit OS=Homo sapiens OX=9606 GN=NAE1 PE=1 SV=1	33	10	11	10	534	60.2	5.4
Q9UI30	High	Multifunctional methyltransferase subunit TRM112-like protein OS=Homo sapiens OX=9606 GN=TRMT112 PE=1 SV=1	68	6	12	6	125	14.2	5.26
P0C0S5	High	Histone H2A.Z OS=Homo sapiens OX=9606 GN=H2AZ1 PE=1 SV=2	31	4	34	2	128	13.5	10.58
O00233	High	26S proteasome non-ATPase regulatory subunit 9 OS=Homo sapiens OX=9606 GN=PSMD9 PE=1 SV=3	39	8	10	8	223	24.7	6.95
Q6RW13	High	Type-1 angiotensin II receptor-associated protein OS=Homo sapiens OX=9606 GN=AGTRAP PE=1 SV=1	35	4	8	4	159	17.4	6.14
Q00577	High	Transcriptional activator protein Pur-alpha OS=Homo sapiens OX=9606 GN=PURA PE=1 SV=2	37	6	8	6	322	34.9	6.44
Q9UQ90	High	Paraplegin OS=Homo sapiens OX=9606 GN=SPG7 PE=1 SV=2	21	7	7	7	795	88.2	8.69
E7EQL5	High	Cytoplasmic dynein 1 intermediate chain 2 (Fragment) OS=Homo sapiens OX=9606 GN=DYNC1I2 PE=1 SV=1	32	6	9	1	305	34.9	5.03
O95163	High	Elongator complex protein 1 OS=Homo sapiens OX=9606 GN=ELP1 PE=1 SV=3	11	9	9	9	1332	150.2	5.94
Q13547	High	Histone deacetylase 1 OS=Homo sapiens OX=9606 GN=HDAC1 PE=1 SV=1	24	7	9	4	482	55.1	5.48
A0A0A0MTJ9	High	Neutral cholesterol ester hydrolase 1 OS=Homo sapiens OX=9606 GN=NCEH1 PE=1 SV=1	20	6	9	6	448	49.9	7.21
O15446	High	DNA-directed RNA polymerase I subunit RPA34 OS=Homo sapiens OX=9606 GN=CD3EAP PE=1 SV=1	33	7	11	7	510	55	8.51
P49750	High	YLP motif-containing protein 1 OS=Homo sapiens OX=9606 GN=YLPM1 PE=1 SV=4	7	10	11	10	2146	241.5	6.55
Q8IVS2	High	Malonyl-CoA-acyl carrier protein transacylase, mitochondrial OS=Homo sapiens OX=9606 GN=MCAT PE=1 SV=2	35	9	11	9	390	42.9	8.72
P33897	High	ATP-binding cassette sub-family D member 1 OS=Homo sapiens OX=9606 GN=ABCD1 PE=1 SV=2	13	6	9	6	745	82.9	8.95
Q15904	High	V-type proton ATPase subunit S1 OS=Homo sapiens OX=9606 GN=ATP6AP1 PE=1 SV=2	19	8	9	8	470	52	6.14
Q9NQH7	High	Xaa-Pro aminopeptidase 3 OS=Homo sapiens OX=9606 GN=XPNPEP3 PE=1 SV=1	20	7	8	6	507	57	6.83
P63167	High	Dynein light chain 1, cytoplasmic OS=Homo sapiens OX=9606 GN=DYNLL1 PE=1 SV=1	38	3	15	1	89	10.4	7.4
Q96HY6	High	DDRGK domain-containing protein 1 OS=Homo sapiens OX=9606 GN=DDRGK1 PE=1 SV=2	36	6	8	6	314	35.6	5.12
O43493	High	Trans-Golgi network integral membrane protein 2 OS=Homo sapiens OX=9606 GN=TGOLN2 PE=1 SV=4	19	8	10	8	437	45.9	5.63
Q9BXW9	High	Fanconi anemia group D2 protein OS=Homo sapiens OX=9606 GN=FANCD2 PE=1 SV=2	13	10	11	10	1451	164	5.88
P30566	High	Adenylosuccinate lyase OS=Homo sapiens OX=9606 GN=ADSL PE=1 SV=2	32	9	10	9	484	54.9	7.11
Q9NZ45	High	CDGSH iron-sulfur domain-containing protein 1 OS=Homo sapiens OX=9606 GN=CISD1 PE=1 SV=1	44	5	13	5	108	12.2	9.09
Q53EP0	High	Fibronectin type III domain-containing protein 3B OS=Homo sapiens OX=9606 GN=FNDC3B PE=1 SV=2	15	10	11	10	1204	132.8	5.95
Q9HB07	High	UPF0160 protein MYG1, mitochondrial OS=Homo sapiens OX=9606 GN=C12orf10 PE=1 SV=2	18	5	11	5	376	42.4	6.67
Q96S55	High	ATPase WRNIP1 OS=Homo sapiens OX=9606 GN=WRNIP1 PE=1 SV=2	15	7	8	7	665	72.1	6.1
Q9H1A4	High	Anaphase-promoting complex subunit 1 OS=Homo sapiens OX=9606 GN=ANAPC1 PE=1 SV=1	9	9	9	9	1944	216.4	6.3
Q15031	High	Probable leucine--tRNA ligase, mitochondrial OS=Homo sapiens OX=9606 GN=LARS2 PE=1 SV=2	17	8	8	8	903	101.9	8.22
Q6RFH5	High	WD repeat-containing protein 74 OS=Homo sapiens OX=9606 GN=WDR74 PE=1 SV=1	34	8	11	8	385	42.4	8.32
Q96SI9	High	Spermatid perinuclear RNA-binding protein OS=Homo sapiens OX=9606 GN=STRBP PE=1 SV=1	12	7	19	2	672	73.6	8.72
P18859	High	ATP synthase-coupling factor 6, mitochondrial OS=Homo sapiens OX=9606 GN=ATP5PF PE=1 SV=1	46	4	15	4	108	12.6	9.52
P42677	High	40S ribosomal protein S27 OS=Homo sapiens OX=9606 GN=RPS27 PE=1 SV=3	39	4	14	2	84	9.5	9.45
Q13425	High	Beta-2-syntrophin OS=Homo sapiens OX=9606 GN=SNTB2 PE=1 SV=1	17	7	9	7	540	57.9	8.82
Q9UBK8	High	Methionine synthase reductase OS=Homo sapiens OX=9606 GN=MTRR PE=1 SV=4	12	5	8	5	698	77.6	6.49
Q9Y570	High	Protein phosphatase methylesterase 1 OS=Homo sapiens OX=9606 GN=PPME1 PE=1 SV=3	31	7	10	7	386	42.3	5.97
A0A1B0GTL5	High	Rab11 family-interacting protein 5 OS=Homo sapiens OX=9606 GN=RAB11FIP5 PE=1 SV=1	12	8	9	8	1324	138.3	5.21
Q68EM7	High	Rho GTPase-activating protein 17 OS=Homo sapiens OX=9606 GN=ARHGAP17 PE=1 SV=1	9	5	7	5	881	95.4	7.62
Q9NX40	High	OCIA domain-containing protein 1 OS=Homo sapiens OX=9606 GN=OCIAD1 PE=1 SV=1	20	5	12	5	245	27.6	7.49
P40222	High	Alpha-taxilin OS=Homo sapiens OX=9606 GN=TXLNA PE=1 SV=3	26	8	9	8	546	61.9	6.52
H3BSH7	High	U3 small nucleolar RNA-associated protein 4 homolog (Fragment) OS=Homo sapiens OX=9606 GN=UTP4 PE=1 SV=1	19	8	9	8	700	77.9	8.72
Q7Z7H8	High	39S ribosomal protein L10, mitochondrial OS=Homo sapiens OX=9606 GN=MRPL10 PE=1 SV=3	44	6	8	6	261	29.3	9.58
P53985	High	Monocarboxylate transporter 1 OS=Homo sapiens OX=9606 GN=SLC16A1 PE=1 SV=3	13	6	8	6	500	53.9	8.66
A0A3B3IUB1	High	Translation initiation factor eIF-2B subunit epsilon OS=Homo sapiens OX=9606 GN=EIF2B5 PE=1 SV=1	19	7	8	7	729	81.2	5.08
Q9H2D1	High	Mitochondrial folate transporter/carrier OS=Homo sapiens OX=9606 GN=SLC25A32 PE=1 SV=2	26	5	7	5	315	35.4	9.45
P02649	High	Apolipoprotein E OS=Homo sapiens OX=9606 GN=APOE PE=1 SV=1	12	4	13	4	317	36.1	5.73
Q9H0B6	High	Kinesin light chain 2 OS=Homo sapiens OX=9606 GN=KLC2 PE=1 SV=1	19	8	10	5	622	68.9	7.15
Q9NZD8	High	Maspardin OS=Homo sapiens OX=9606 GN=SPG21 PE=1 SV=1	40	7	10	7	308	34.9	6.28
O60437	High	Periplakin OS=Homo sapiens OX=9606 GN=PPL PE=1 SV=4	8	9	9	9	1756	204.6	5.6
P09496	High	Clathrin light chain A OS=Homo sapiens OX=9606 GN=CLTA PE=1 SV=1	19	6	15	6	248	27.1	4.51
Q13442	High	28 kDa heat- and acid-stable phosphoprotein OS=Homo sapiens OX=9606 GN=PDAP1 PE=1 SV=1	38	7	10	7	181	20.6	8.87
Q14669	High	E3 ubiquitin-protein ligase TRIP12 OS=Homo sapiens OX=9606 GN=TRIP12 PE=1 SV=1	6	8	9	8	1992	220.3	8.48
Q14651	High	Plastin-1 OS=Homo sapiens OX=9606 GN=PLS1 PE=1 SV=2	8	5	11	1	629	70.2	5.41
Q8TAE8	High	Growth arrest and DNA damage-inducible proteins-interacting protein 1 OS=Homo sapiens OX=9606 GN=GADD45GIP1 PE=1 SV=1	40	6	10	6	222	25.4	10.02
Q9NTZ6	High	RNA-binding protein 12 OS=Homo sapiens OX=9606 GN=RBM12 PE=1 SV=1	11	9	10	9	932	97.3	8.63
Q9UIQ6	High	Leucyl-cystinyl aminopeptidase OS=Homo sapiens OX=9606 GN=LNPEP PE=1 SV=3	14	10	11	10	1025	117.3	5.73
Q9BY32	High	Inosine triphosphate pyrophosphatase OS=Homo sapiens OX=9606 GN=ITPA PE=1 SV=2	43	5	11	5	194	21.4	5.66
Q08378	High	Golgin subfamily A member 3 OS=Homo sapiens OX=9606 GN=GOLGA3 PE=1 SV=2	11	10	10	10	1498	167.3	5.44
A0A087WTA5	High	Translation initiation factor eIF-2B subunit delta OS=Homo sapiens OX=9606 GN=EIF2B4 PE=1 SV=1	21	7	8	1	520	57.5	9.38
Q9UKM7	High	Endoplasmic reticulum mannosyl-oligosaccharide 1,2-alpha-mannosidase OS=Homo sapiens OX=9606 GN=MAN1B1 PE=1 SV=2	13	6	9	6	699	79.5	7.72
O14734	High	Acyl-coenzyme A thioesterase 8 OS=Homo sapiens OX=9606 GN=ACOT8 PE=1 SV=1	25	6	10	6	319	35.9	7.56
P00403	High	Cytochrome c oxidase subunit 2 OS=Homo sapiens OX=9606 GN=MT-CO2 PE=1 SV=1	31	6	13	6	227	25.5	4.82
P55010	High	Eukaryotic translation initiation factor 5 OS=Homo sapiens OX=9606 GN=EIF5 PE=1 SV=2	28	9	11	9	431	49.2	5.58
Q8NFQ8	High	Torsin-1A-interacting protein 2 OS=Homo sapiens OX=9606 GN=TOR1AIP2 PE=1 SV=1	20	6	9	5	470	51.2	4.96
Q03405	High	Urokinase plasminogen activator surface receptor OS=Homo sapiens OX=9606 GN=PLAUR PE=1 SV=1	29	6	9	6	335	37	6.65
Q99988	High	Growth/differentiation factor 15 OS=Homo sapiens OX=9606 GN=GDF15 PE=1 SV=3	32	6	9	6	308	34.1	9.66
Q9UHV9	High	Prefoldin subunit 2 OS=Homo sapiens OX=9606 GN=PFDN2 PE=1 SV=1	43	5	9	5	154	16.6	6.58
Q86X55	High	Histone-arginine methyltransferase CARM1 OS=Homo sapiens OX=9606 GN=CARM1 PE=1 SV=3	19	9	10	9	608	65.8	6.73
Q9H8Y8	High	Golgi reassembly-stacking protein 2 OS=Homo sapiens OX=9606 GN=GORASP2 PE=1 SV=3	19	5	12	5	452	47.1	4.82
Q6KB66	High	Keratin, type II cytoskeletal 80 OS=Homo sapiens OX=9606 GN=KRT80 PE=1 SV=2	9	4	14	3	452	50.5	5.67
Q8WU90	High	Zinc finger CCCH domain-containing protein 15 OS=Homo sapiens OX=9606 GN=ZC3H15 PE=1 SV=1	25	8	10	8	426	48.6	5.31
Q5ZPR3	High	CD276 antigen OS=Homo sapiens OX=9606 GN=CD276 PE=1 SV=1	27	6	9	6	534	57.2	4.91
Q9H0L4	High	Cleavage stimulation factor subunit 2 tau variant OS=Homo sapiens OX=9606 GN=CSTF2T PE=1 SV=1	16	6	10	2	616	64.4	7.25
M0R165	High	Epidermal growth factor receptor substrate 15-like 1 OS=Homo sapiens OX=9606 GN=EPS15L1 PE=1 SV=1	21	8	8	8	756	83.4	5.11
E7EQY1	High	Protein FAM136A OS=Homo sapiens OX=9606 GN=FAM136A PE=1 SV=1	33	7	9	7	245	26.8	8.24
Q9NZL9	High	Methionine adenosyltransferase 2 subunit beta OS=Homo sapiens OX=9606 GN=MAT2B PE=1 SV=1	31	8	10	8	334	37.5	7.36
Q7Z2T5	High	TRMT1-like protein OS=Homo sapiens OX=9606 GN=TRMT1L PE=1 SV=2	20	10	11	10	733	81.7	7.88
A0A140TA86	High	MICOS complex subunit MIC13 OS=Homo sapiens OX=9606 GN=MICOS13 PE=1 SV=1	53	3	7	3	140	15.4	9.03
Q01130	High	Serine/arginine-rich splicing factor 2 OS=Homo sapiens OX=9606 GN=SRSF2 PE=1 SV=4	14	3	13	3	221	25.5	11.85
Q9UL26	High	Ras-related protein Rab-22A OS=Homo sapiens OX=9606 GN=RAB22A PE=1 SV=2	52	7	11	5	194	21.8	8.15
P61970	High	Nuclear transport factor 2 OS=Homo sapiens OX=9606 GN=NUTF2 PE=1 SV=1	69	5	9	5	127	14.5	5.38
P84095	High	Rho-related GTP-binding protein RhoG OS=Homo sapiens OX=9606 GN=RHOG PE=1 SV=1	45	7	10	7	191	21.3	8.12
Q9C0J8	High	pre-mRNA 3' end processing protein WDR33 OS=Homo sapiens OX=9606 GN=WDR33 PE=1 SV=2	11	9	10	9	1336	145.8	9.17
Q8WXX5	High	DnaJ homolog subfamily C member 9 OS=Homo sapiens OX=9606 GN=DNAJC9 PE=1 SV=1	41	7	9	7	260	29.9	5.73
Q12972	High	Nuclear inhibitor of protein phosphatase 1 OS=Homo sapiens OX=9606 GN=PPP1R8 PE=1 SV=2	36	8	8	8	351	38.5	7.37
O75116	High	Rho-associated protein kinase 2 OS=Homo sapiens OX=9606 GN=ROCK2 PE=1 SV=4	10	9	10	9	1388	160.8	6.02
Q5VV41	High	Rho guanine nucleotide exchange factor 16 OS=Homo sapiens OX=9606 GN=ARHGEF16 PE=1 SV=1	19	8	10	8	709	80.1	7.36
E7ERS3	High	Zinc finger CCCH domain-containing protein 18 OS=Homo sapiens OX=9606 GN=ZC3H18 PE=1 SV=1	13	8	12	8	977	108.9	8.44
P17301	High	Integrin alpha-2 OS=Homo sapiens OX=9606 GN=ITGA2 PE=1 SV=1	10	8	10	8	1181	129.2	5.31
Q4V328	High	GRIP1-associated protein 1 OS=Homo sapiens OX=9606 GN=GRIPAP1 PE=1 SV=2	16	10	10	10	841	95.9	5.11
Q9H089	High	Large subunit GTPase 1 homolog OS=Homo sapiens OX=9606 GN=LSG1 PE=1 SV=2	23	10	11	10	658	75.2	6.38
Q5T1M5	High	FK506-binding protein 15 OS=Homo sapiens OX=9606 GN=FKBP15 PE=1 SV=2	13	9	10	9	1219	133.5	5.2
P20742	High	Pregnancy zone protein OS=Homo sapiens OX=9606 GN=PZP PE=1 SV=4	2	3	18	1	1482	163.8	6.38
Q14554	High	Protein disulfide-isomerase A5 OS=Homo sapiens OX=9606 GN=PDIA5 PE=1 SV=1	27	9	12	9	519	59.6	7.91
[truncated: 3,086 more rows]
